# Supplementary material for: A double-blind randomised controlled trial on the effect of Tocovid, a tocotrienol-rich capsule on postoperative atrial fibrillation at the National Heart Institute, Kuala Lumpur: an interim blinded analysis
Source: Springer Nature journal article supplement (doi:10.1186/s13019-021-01721-6), 2021-11-24
Supplement: MOESM2 [file 19897696]

```

EXAMINE VARIABLES=AGE BY AF
/PLOT BOXPLOT STEMLEAF NPLOT
/COMPARE GROUPS
/STATISTICS DESCRIPTIVES
/CINTERVAL 95
/MISSING LISTWISE
/NOTOTAL.

```

## Explore

### Notes

|                        |                                   |                                                                                                                                                                  |
|------------------------|-----------------------------------|------------------------------------------------------------------------------------------------------------------------------------------------------------------|
| Output Created         |                                   | 01-MAR-2021 14:30:58                                                                                                                                             |
| Comments               |                                   |                                                                                                                                                                  |
| Input                  | Data                              | C:\Users\user\Downloads\ImAnisah<br>Statistic & SPSS\TOCO T3\Data<br>toco.sav                                                                                    |
|                        | Active Dataset                    | DataSet1                                                                                                                                                         |
|                        | Filter                            | <none>                                                                                                                                                           |
|                        | Weight                            | <none>                                                                                                                                                           |
|                        | Split File                        | <none>                                                                                                                                                           |
|                        | N of Rows in Working Data<br>File | 156                                                                                                                                                              |
| Missing Value Handling | Definition of Missing             | User-defined missing values for<br>dependent variables are treated as<br>missing.                                                                                |
|                        | Cases Used                        | Statistics are based on cases with<br>no missing values for any dependent<br>variable or factor used.                                                            |
| Syntax                 |                                   | EXAMINE VARIABLES=AGE BY AF<br>/PLOT BOXPLOT STEMLEAF<br>NPLOT<br>/COMPARE GROUPS<br>/STATISTICS DESCRIPTIVES<br>/CINTERVAL 95<br>/MISSING LISTWISE<br>/NOTOTAL. |
| Resources              | Processor Time                    | 00:00:02.95                                                                                                                                                      |
|                        | Elapsed Time                      | 00:00:07.96                                                                                                                                                      |

**AF**

**Case Processing Summary**

|     |     | Cases |         |         |         |       |         |
|-----|-----|-------|---------|---------|---------|-------|---------|
|     |     | Valid |         | Missing |         | Total |         |
|     |     | N     | Percent | N       | Percent | N     | Percent |
| AGE | No  | 118   | 100.0%  | 0       | 0.0%    | 118   | 100.0%  |
|     | Yes | 38    | 100.0%  | 0       | 0.0%    | 38    | 100.0%  |

**Descriptives**

| AF                               |             | Statistic                        | Std. Error  |       |       |
|----------------------------------|-------------|----------------------------------|-------------|-------|-------|
| AGE                              | No          | Mean                             | 61.30       | .702  |       |
|                                  |             | 95% Confidence Interval for Mean | Lower Bound | 59.91 |       |
|                                  |             |                                  | Upper Bound | 62.69 |       |
|                                  |             | 5% Trimmed Mean                  | 61.32       |       |       |
|                                  |             | Median                           | 61.00       |       |       |
|                                  |             | Variance                         | 58.125      |       |       |
|                                  |             | Std. Deviation                   | 7.624       |       |       |
|                                  |             | Minimum                          | 39          |       |       |
|                                  |             | Maximum                          | 85          |       |       |
|                                  |             | Range                            | 46          |       |       |
|                                  |             | Interquartile Range              | 11          |       |       |
|                                  |             | Skewness                         | -.029       | .223  |       |
|                                  |             | Kurtosis                         | .224        | .442  |       |
|                                  |             | Yes                              | Yes         | Mean  | 61.87 |
| 95% Confidence Interval for Mean | Lower Bound |                                  |             | 59.82 |       |
|                                  | Upper Bound |                                  |             | 63.92 |       |
| 5% Trimmed Mean                  | 62.07       |                                  |             |       |       |
| Median                           | 61.50       |                                  |             |       |       |
| Variance                         | 38.928      |                                  |             |       |       |
| Std. Deviation                   | 6.239       |                                  |             |       |       |
| Minimum                          | 49          |                                  |             |       |       |
| Maximum                          | 72          |                                  |             |       |       |
| Range                            | 23          |                                  |             |       |       |
| Interquartile Range              | 9           |                                  |             |       |       |
| Skewness                         | -.488       |                                  |             | .383  |       |
| Kurtosis                         | -.634       |                                  |             | .750  |       |

**Tests of Normality**

| AF  |     | Kolmogorov-Smirnov <sup>a</sup> |     |       | Shapiro-Wilk |     |      |
|-----|-----|---------------------------------|-----|-------|--------------|-----|------|
|     |     | Statistic                       | df  | Sig.  | Statistic    | df  | Sig. |
| AGE | No  | .062                            | 118 | .200* | .993         | 118 | .832 |
|     | Yes | .140                            | 38  | .060  | .950         | 38  | .086 |

\*. This is a lower bound of the true significance.

a. Lilliefors Significance Correction

# AGE

## Stem-and-Leaf Plots

AGE Stem-and-Leaf Plot for  
AF= No

| Frequency | Stem &   | Leaf          |
|-----------|----------|---------------|
| 1.00      | Extremes | (=<39)        |
| .00       | 4 .      |               |
| 2.00      | 4 .      | 45            |
| .00       | 4 .      |               |
| 5.00      | 4 .      | 99999         |
| 3.00      | 5 .      | 011           |
| 6.00      | 5 .      | 222233        |
| 10.00     | 5 .      | 4444455555    |
| 9.00      | 5 .      | 666777777     |
| 13.00     | 5 .      | 8888888999999 |
| 13.00     | 6 .      | 0000000111111 |
| 12.00     | 6 .      | 222223333333  |
| 5.00      | 6 .      | 44555         |
| 12.00     | 6 .      | 666666677777  |
| 11.00     | 6 .      | 88888999999   |
| 7.00      | 7 .      | 0000111       |
| 4.00      | 7 .      | 2233          |
| 3.00      | 7 .      | 455           |
| 1.00      | 7 .      | 6             |
| 1.00      | Extremes | (>=85)        |

Stem width: 10  
Each leaf: 1 case(s)

AGE Stem-and-Leaf Plot for  
AF= Yes

| Frequency | Stem & | Leaf           |
|-----------|--------|----------------|
| 2.00      | 4 .    | 99             |
| 3.00      | 5 .    | 114            |
| 7.00      | 5 .    | 5567899        |
| 9.00      | 6 .    | 000111124      |
| 14.00     | 6 .    | 55566677788899 |

3.00            7 . 002

Stem width:        10  
Each leaf:         1 case(s)

## Normal Q-Q Plots

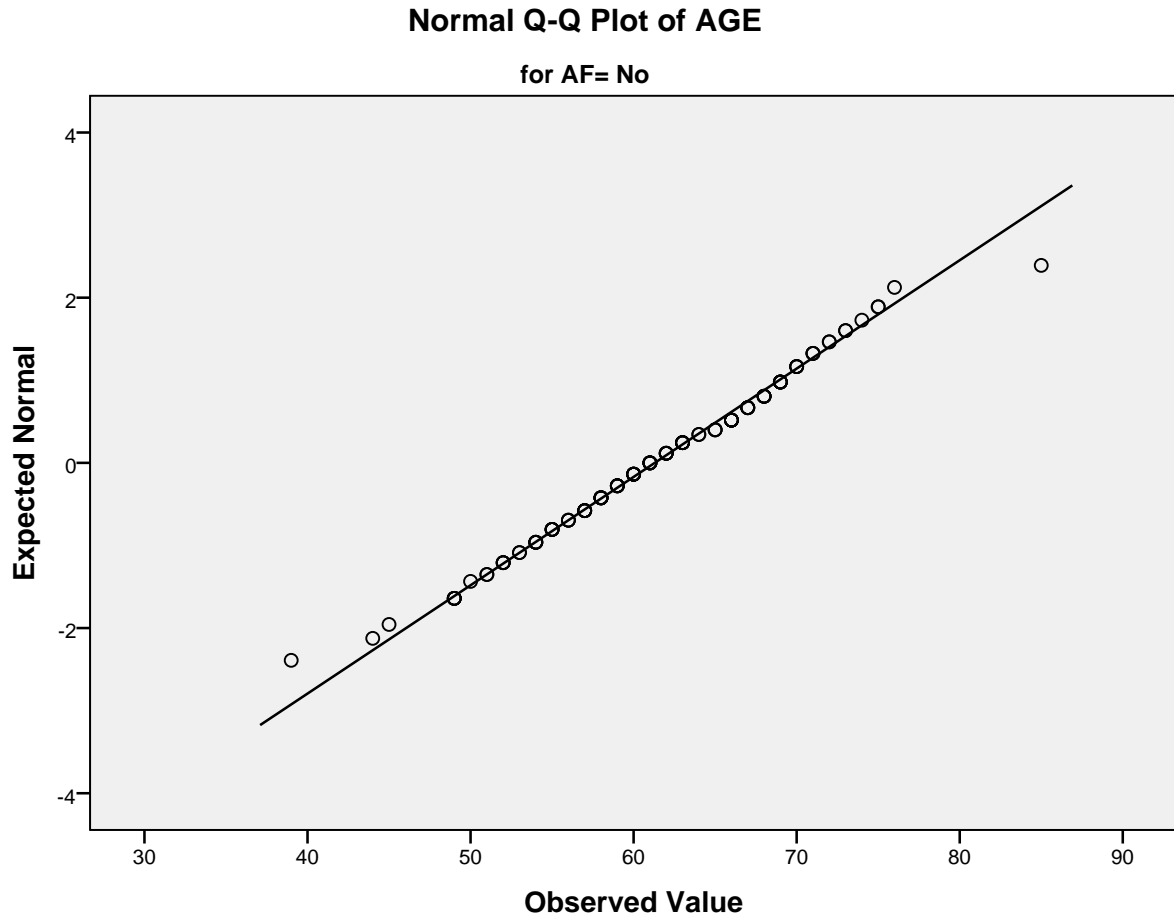

### Normal Q-Q Plot of AGE

for AF= Yes

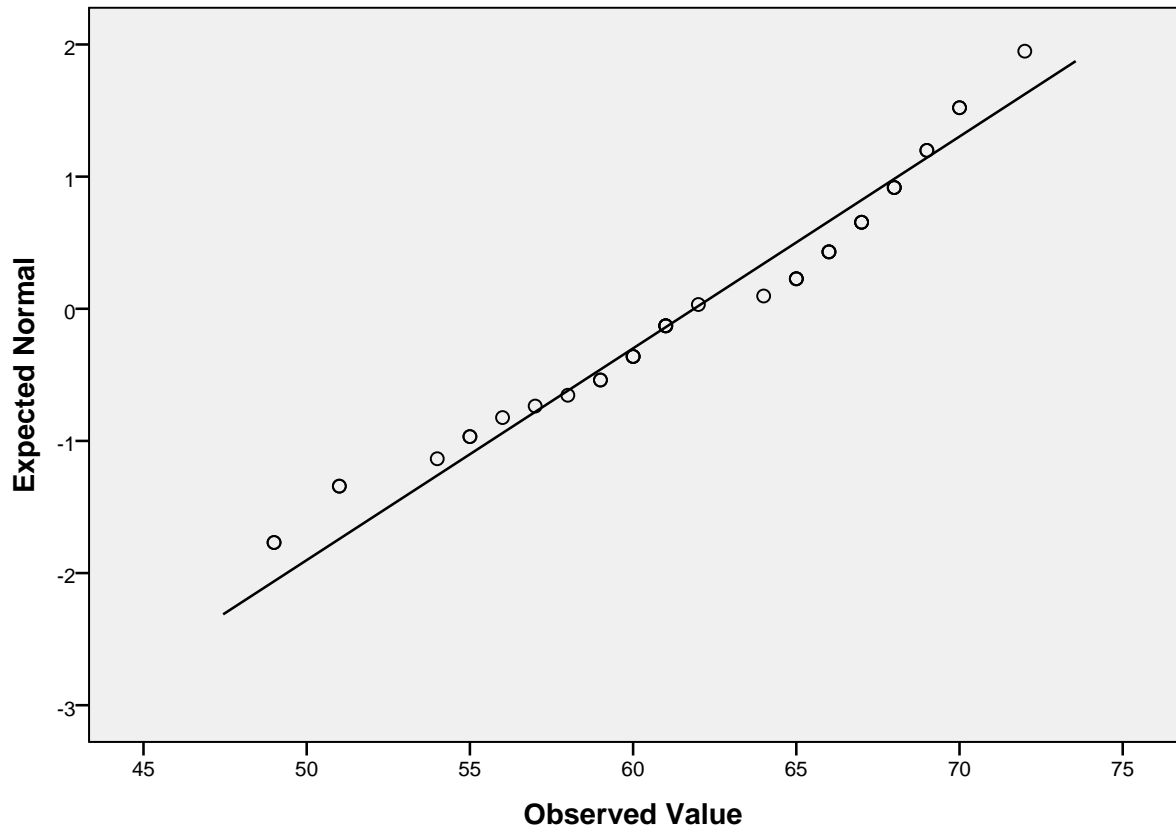

### Detrended Normal Q-Q Plots

### Detrended Normal Q-Q Plot of AGE

for AF= No

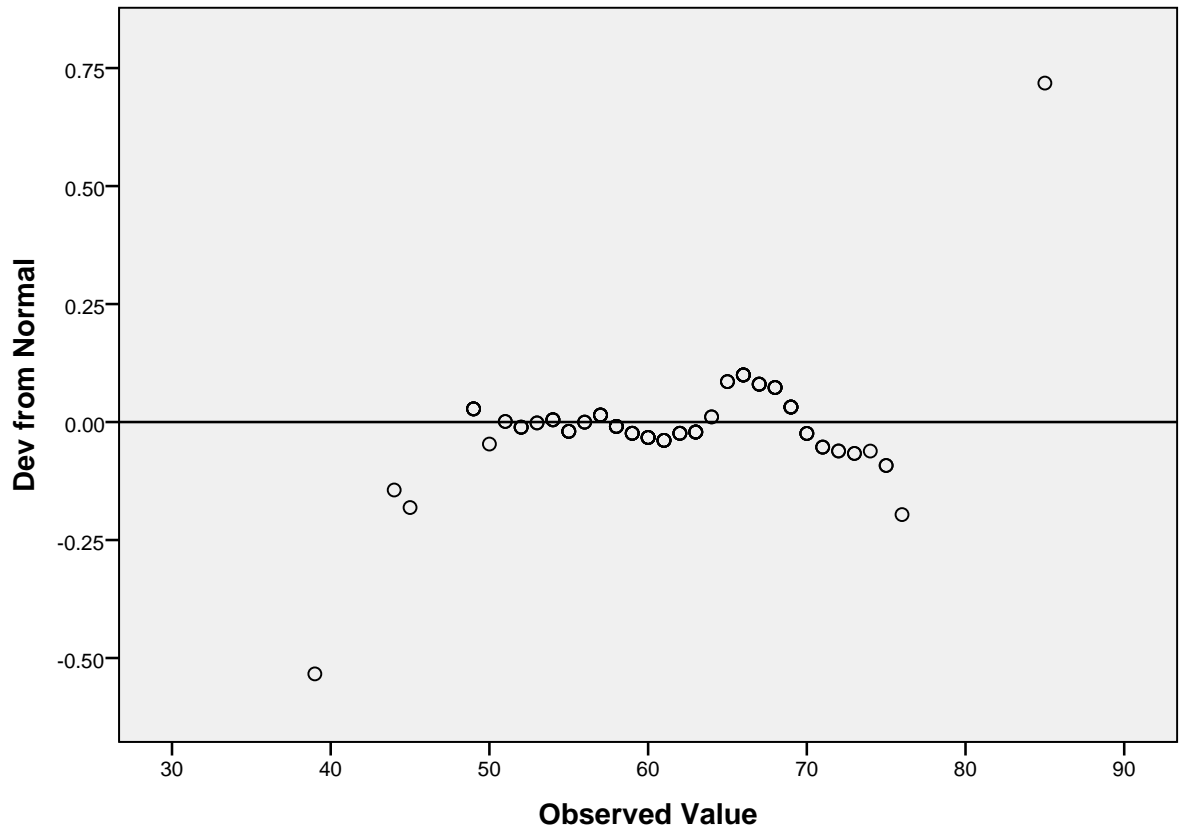

### Detrended Normal Q-Q Plot of AGE

for AF= Yes

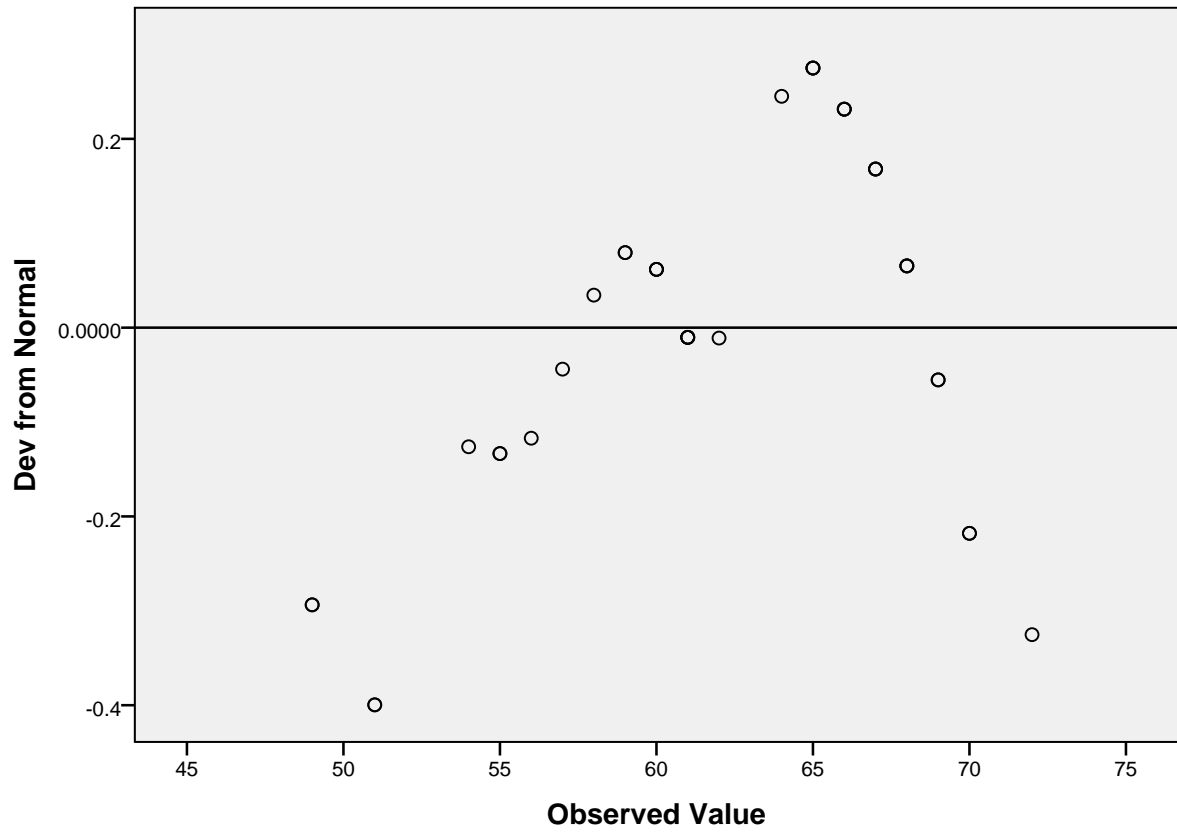

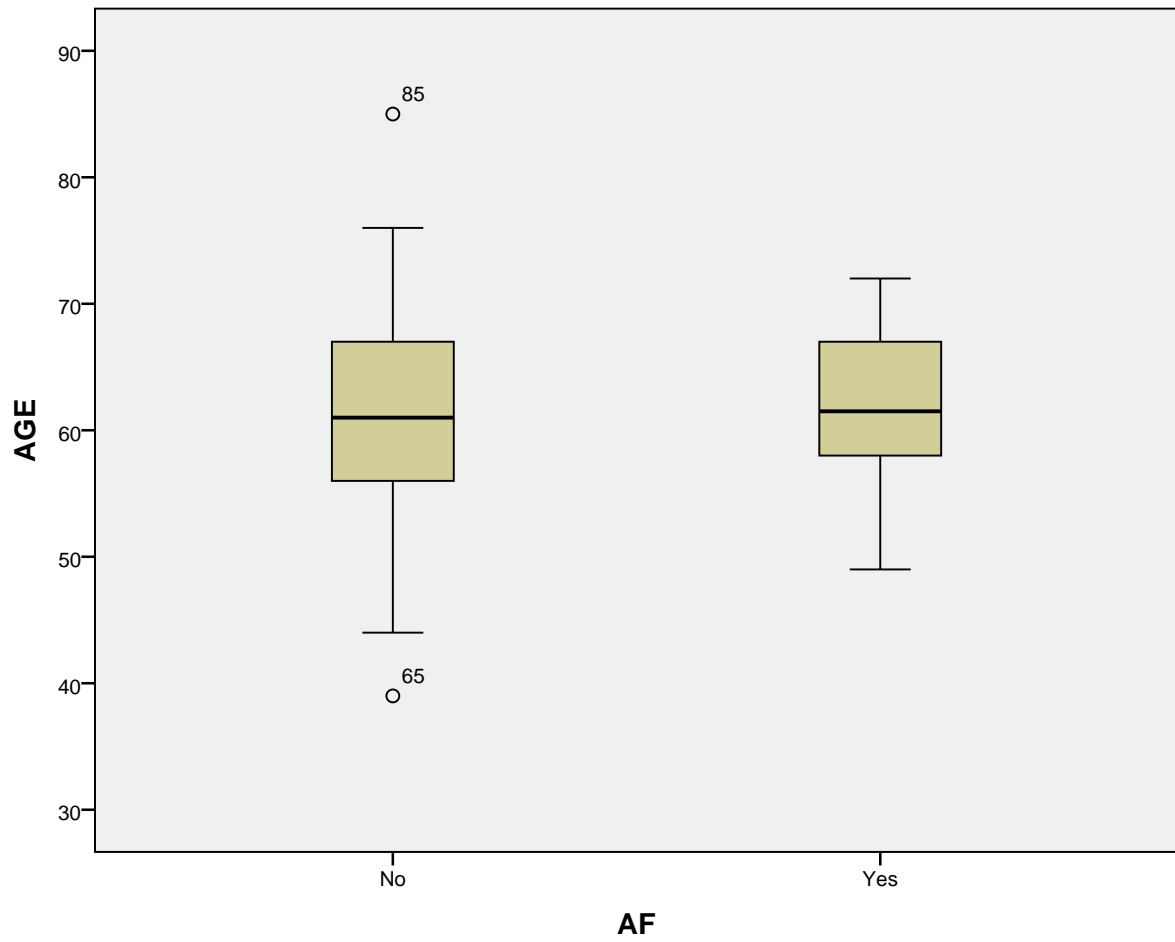

```
T-TEST GROUPS=AF(0 1)  
/MISSING=ANALYSIS  
/VARIABLES=AGE  
/CRITERIA=CI(.95).
```

## T-Test



**Notes**

|                        |                                                                                    |                                                                                                                            |
|------------------------|------------------------------------------------------------------------------------|----------------------------------------------------------------------------------------------------------------------------|
| Output Created         | 01-MAR-2021 14:31:47                                                               |                                                                                                                            |
| Comments               |                                                                                    |                                                                                                                            |
| Input                  | Data                                                                               | C:\Users\user\Downloads\ImAnisah Statistic & SPSS\TOCO T3\Data toco.sav                                                    |
|                        | Active Dataset                                                                     | DataSet1                                                                                                                   |
|                        | Filter                                                                             | <none>                                                                                                                     |
|                        | Weight                                                                             | <none>                                                                                                                     |
|                        | Split File                                                                         | <none>                                                                                                                     |
|                        | N of Rows in Working Data File                                                     | 156                                                                                                                        |
| Missing Value Handling | Definition of Missing                                                              | User defined missing values are treated as missing.                                                                        |
|                        | Cases Used                                                                         | Statistics for each analysis are based on the cases with no missing or out-of-range data for any variable in the analysis. |
| Syntax                 | T-TEST GROUPS=AF(0 1)<br>/MISSING=ANALYSIS<br>/VARIABLES=AGE<br>/CRITERIA=CI(.95). |                                                                                                                            |
| Resources              | Processor Time                                                                     | 00:00:00.02                                                                                                                |
|                        | Elapsed Time                                                                       | 00:00:00.24                                                                                                                |

**Group Statistics**

|     | AF  | N   | Mean  | Std. Deviation | Std. Error Mean |
|-----|-----|-----|-------|----------------|-----------------|
| AGE | No  | 118 | 61.30 | 7.624          | .702            |
|     | Yes | 38  | 61.87 | 6.239          | 1.012           |

**Independent Samples Test**

|     |                             | Levene's Test for Equality of Variances |      | t-test for Equality of Means |        |                 |                 |                       |                                           |       |
|-----|-----------------------------|-----------------------------------------|------|------------------------------|--------|-----------------|-----------------|-----------------------|-------------------------------------------|-------|
|     |                             | F                                       | Sig. | t                            | df     | Sig. (2-tailed) | Mean Difference | Std. Error Difference | 95% Confidence Interval of the Difference |       |
|     |                             |                                         |      |                              |        |                 |                 |                       | Lower                                     | Upper |
| AGE | Equal variances assumed     | 1.342                                   | .248 | -.419                        | 154    | .676            | -.572           | 1.364                 | -3.267                                    | 2.124 |
|     | Equal variances not assumed |                                         |      | -.464                        | 75.609 | .644            | -.572           | 1.232                 | -3.025                                    | 1.881 |

**CROSSTABS**

```

/TABLES=GENDER ETHNIC BY AF
/FORMAT=AVALUE TABLES
/STATISTICS=CHISQ
/CELLS=COUNT ROW COLUMN
/COUNT ROUND CELL.

```

**Crosstabs**

**Notes**

|                        |                                   |                                                                                                                                          |
|------------------------|-----------------------------------|------------------------------------------------------------------------------------------------------------------------------------------|
| Output Created         | 01-MAR-2021 14:32:17              |                                                                                                                                          |
| Comments               |                                   |                                                                                                                                          |
| Input                  | Data                              | C:\Users\user\Downloads\ImAnisah<br>Statistic & SPSS\TOCO T3\Data<br>toco.sav                                                            |
|                        | Active Dataset                    | DataSet1                                                                                                                                 |
|                        | Filter                            | <none>                                                                                                                                   |
|                        | Weight                            | <none>                                                                                                                                   |
|                        | Split File                        | <none>                                                                                                                                   |
|                        | N of Rows in Working Data<br>File | 156                                                                                                                                      |
| Missing Value Handling | Definition of Missing             | User-defined missing values are<br>treated as missing.                                                                                   |
|                        | Cases Used                        | Statistics for each table are based<br>on all the cases with valid data in the<br>specified range(s) for all variables in<br>each table. |
| Syntax                 |                                   | CROSSTABS<br>/TABLES=GENDER ETHNIC BY<br>AF<br>/FORMAT=AVALUE TABLES<br>/STATISTICS=CHISQ<br>/CELLS=COUNT ROW COLUMN...                  |
| Resources              | Processor Time                    | 00:00:00.02                                                                                                                              |
|                        | Elapsed Time                      | 00:00:00.04                                                                                                                              |
|                        | Dimensions Requested              | 2                                                                                                                                        |
|                        | Cells Available                   | 524245                                                                                                                                   |

**Case Processing Summary**

|             | Cases |         |         |         |       |         |
|-------------|-------|---------|---------|---------|-------|---------|
|             | Valid |         | Missing |         | Total |         |
|             | N     | Percent | N       | Percent | N     | Percent |
| GENDER * AF | 156   | 100.0%  | 0       | 0.0%    | 156   | 100.0%  |
| ETHNIC * AF | 156   | 100.0%  | 0       | 0.0%    | 156   | 100.0%  |

**GENDER \* AF**

**Crosstab**

|        |                 |                 | AF     |        | Total  |
|--------|-----------------|-----------------|--------|--------|--------|
|        |                 |                 | No     | Yes    |        |
| GENDER | Male            | Count           | 94     | 36     | 130    |
|        |                 | % within GENDER | 72.3%  | 27.7%  | 100.0% |
|        |                 | % within AF     | 79.7%  | 94.7%  | 83.3%  |
|        | Female          | Count           | 24     | 2      | 26     |
|        |                 | % within GENDER | 92.3%  | 7.7%   | 100.0% |
|        |                 | % within AF     | 20.3%  | 5.3%   | 16.7%  |
| Total  | Count           | 118             | 38     | 156    |        |
|        | % within GENDER | 75.6%           | 24.4%  | 100.0% |        |
|        | % within AF     | 100.0%          | 100.0% | 100.0% |        |

**Chi-Square Tests**

|                                    | Value              | df | Asymptotic<br>Significance (2-<br>sided) | Exact Sig. (2-<br>sided) | Exact Sig. (1-<br>sided) |
|------------------------------------|--------------------|----|------------------------------------------|--------------------------|--------------------------|
| Pearson Chi-Square                 | 4.704 <sup>a</sup> | 1  | .030                                     | .043                     | .021                     |
| Continuity Correction <sup>b</sup> | 3.681              | 1  | .055                                     |                          |                          |
| Likelihood Ratio                   | 5.709              | 1  | .017                                     |                          |                          |
| Fisher's Exact Test                |                    |    |                                          |                          |                          |
| Linear-by-Linear<br>Association    | 4.674              | 1  | .031                                     |                          |                          |
| N of Valid Cases                   | 156                |    |                                          |                          |                          |

a. 0 cells (0.0%) have expected count less than 5. The minimum expected count is 6.33.

b. Computed only for a 2x2 table

**ETHNIC \* AF**

**Crosstab**

|        |                 |                 | AF     |        | Total  |
|--------|-----------------|-----------------|--------|--------|--------|
|        |                 |                 | No     | Yes    |        |
| ETHNIC | Malay           | Count           | 100    | 32     | 132    |
|        |                 | % within ETHNIC | 75.8%  | 24.2%  | 100.0% |
|        |                 | % within AF     | 84.7%  | 84.2%  | 84.6%  |
|        | Chinese         | Count           | 5      | 2      | 7      |
|        |                 | % within ETHNIC | 71.4%  | 28.6%  | 100.0% |
|        |                 | % within AF     | 4.2%   | 5.3%   | 4.5%   |
|        | Indian          | Count           | 12     | 4      | 16     |
|        |                 | % within ETHNIC | 75.0%  | 25.0%  | 100.0% |
|        |                 | % within AF     | 10.2%  | 10.5%  | 10.3%  |
|        | Others          | Count           | 1      | 0      | 1      |
|        |                 | % within ETHNIC | 100.0% | 0.0%   | 100.0% |
|        |                 | % within AF     | 0.8%   | 0.0%   | 0.6%   |
| Total  | Count           | 118             | 38     | 156    |        |
|        | % within ETHNIC | 75.6%           | 24.4%  | 100.0% |        |
|        | % within AF     | 100.0%          | 100.0% | 100.0% |        |

**Chi-Square Tests**

|                              | Value             | df | Asymptotic Significance (2-sided) |
|------------------------------|-------------------|----|-----------------------------------|
| Pearson Chi-Square           | .394 <sup>a</sup> | 3  | .941                              |
| Likelihood Ratio             | .628              | 3  | .890                              |
| Linear-by-Linear Association | .004              | 1  | .948                              |
| N of Valid Cases             | 156               |    |                                   |

a. 4 cells (50.0%) have expected count less than 5. The minimum expected count is .24.

DESCRIPTIVES VARIABLES=AGE BMI OnsetAFGrp AFnumber  
/STATISTICS=MEAN STDDEV RANGE MIN MAX.

**Descriptives**

**Notes**

|                        |                                   |                                                                                                    |
|------------------------|-----------------------------------|----------------------------------------------------------------------------------------------------|
| Output Created         |                                   | 01-MAR-2021 14:33:43                                                                               |
| Comments               |                                   |                                                                                                    |
| Input                  | Data                              | C:\Users\user\Downloads\ImAnisah<br>Statistic & SPSS\TOCO T3\Data<br>toco.sav                      |
|                        | Active Dataset                    | DataSet1                                                                                           |
|                        | Filter                            | <none>                                                                                             |
|                        | Weight                            | <none>                                                                                             |
|                        | Split File                        | <none>                                                                                             |
|                        | N of Rows in Working Data<br>File | 156                                                                                                |
| Missing Value Handling | Definition of Missing             | User defined missing values are<br>treated as missing.                                             |
|                        | Cases Used                        | All non-missing data are used.                                                                     |
| Syntax                 |                                   | DESCRIPTIVES VARIABLES=AGE<br>BMI OnsetAFGrp AFnumber<br>/STATISTICS=MEAN STDDEV<br>RANGE MIN MAX. |
| Resources              | Processor Time                    | 00:00:00.02                                                                                        |
|                        | Elapsed Time                      | 00:00:00.01                                                                                        |

**Descriptive Statistics**

|                    | N   | Range | Minimum | Maximum | Mean    | Std. Deviation |
|--------------------|-----|-------|---------|---------|---------|----------------|
| AGE                | 156 | 46    | 39      | 85      | 61.44   | 7.296          |
| BMI                | 156 | 24.87 | 17.60   | 42.47   | 27.2331 | 4.60715        |
| OnsetAFGrp         | 31  | 1     | 0       | 1       | .58     | .502           |
| AFnumber           | 32  | 5     | 1       | 6       | 1.94    | 1.390          |
| Valid N (listwise) | 31  |       |         |         |         |                |

```
FREQUENCIES VARIABLES=AFnumber OnsetAFGrp
  /NTILES=4
  /STATISTICS=STDDEV MEAN
  /ORDER=ANALYSIS.
```

**Frequencies**

**Notes**

|                        |                                   |                                                                                                             |
|------------------------|-----------------------------------|-------------------------------------------------------------------------------------------------------------|
| Output Created         |                                   | 01-MAR-2021 14:34:43                                                                                        |
| Comments               |                                   |                                                                                                             |
| Input                  | Data                              | C:\Users\user\Downloads\ImAnisah<br>Statistic & SPSS\TOCO T3\Data<br>toco.sav                               |
|                        | Active Dataset                    | DataSet1                                                                                                    |
|                        | Filter                            | <none>                                                                                                      |
|                        | Weight                            | <none>                                                                                                      |
|                        | Split File                        | <none>                                                                                                      |
|                        | N of Rows in Working Data<br>File | 156                                                                                                         |
| Missing Value Handling | Definition of Missing             | User-defined missing values are<br>treated as missing.                                                      |
|                        | Cases Used                        | Statistics are based on all cases with<br>valid data.                                                       |
| Syntax                 |                                   | FREQUENCIES<br>VARIABLES=AFnumber<br>OnsetAFGrp<br>/NTILES=4<br>/STATISTICS=STDDEV MEAN<br>/ORDER=ANALYSIS. |
| Resources              | Processor Time                    | 00:00:00.02                                                                                                 |
|                        | Elapsed Time                      | 00:00:00.02                                                                                                 |

**Statistics**

|                |         | AFnumber | OnsetAFGrp |
|----------------|---------|----------|------------|
| N              | Valid   | 32       | 31         |
|                | Missing | 124      | 125        |
| Mean           |         | 1.94     | .58        |
| Std. Deviation |         | 1.390    | .502       |
| Percentiles    | 25      | 1.00     | .00        |
|                | 50      | 1.00     | 1.00       |
|                | 75      | 2.00     | 1.00       |

**Frequency Table**

**AFnumber**

|         |        | Frequency | Percent | Valid Percent | Cumulative Percent |
|---------|--------|-----------|---------|---------------|--------------------|
| Valid   | 1      | 17        | 10.9    | 53.1          | 53.1               |
|         | 2      | 9         | 5.8     | 28.1          | 81.3               |
|         | 3      | 1         | .6      | 3.1           | 84.4               |
|         | 4      | 2         | 1.3     | 6.3           | 90.6               |
|         | 5      | 2         | 1.3     | 6.3           | 96.9               |
|         | 6      | 1         | .6      | 3.1           | 100.0              |
|         | Total  | 32        | 20.5    | 100.0         |                    |
| Missing | System | 124       | 79.5    |               |                    |
| Total   |        | 156       | 100.0   |               |                    |

**OnsetAFGrp**

|         |        | Frequency | Percent | Valid Percent | Cumulative Percent |
|---------|--------|-----------|---------|---------------|--------------------|
| Valid   | <48    | 13        | 8.3     | 41.9          | 41.9               |
|         | >48    | 18        | 11.5    | 58.1          | 100.0              |
|         | Total  | 31        | 19.9    | 100.0         |                    |
| Missing | System | 125       | 80.1    |               |                    |
| Total   |        | 156       | 100.0   |               |                    |

CROSSTABS

```

/TABLES=BMIGroup NYHA BY AF
/FORMAT=AVALUE TABLES
/STATISTICS=CHISQ
/CELLS=COUNT ROW COLUMN
/COUNT ROUND CELL.

```

**Crosstabs**

**Notes**

|                        |                                   |                                                                                                                                          |
|------------------------|-----------------------------------|------------------------------------------------------------------------------------------------------------------------------------------|
| Output Created         | 01-MAR-2021 14:35:42              |                                                                                                                                          |
| Comments               |                                   |                                                                                                                                          |
| Input                  | Data                              | C:\Users\user\Downloads\ImAnisah<br>Statistic & SPSS\TOCO T3\Data<br>toco.sav                                                            |
|                        | Active Dataset                    | DataSet1                                                                                                                                 |
|                        | Filter                            | <none>                                                                                                                                   |
|                        | Weight                            | <none>                                                                                                                                   |
|                        | Split File                        | <none>                                                                                                                                   |
|                        | N of Rows in Working Data<br>File | 156                                                                                                                                      |
| Missing Value Handling | Definition of Missing             | User-defined missing values are<br>treated as missing.                                                                                   |
|                        | Cases Used                        | Statistics for each table are based<br>on all the cases with valid data in the<br>specified range(s) for all variables in<br>each table. |
| Syntax                 |                                   | CROSSTABS<br>/TABLES=BMIGroup NYHA BY AF<br>/FORMAT=AVALUE TABLES<br>/STATISTICS=CHISQ<br>/CELLS=COUNT ROW COLUMN<br>/COUNT ROUND CELL.  |
| Resources              | Processor Time                    | 00:00:00.03                                                                                                                              |
|                        | Elapsed Time                      | 00:00:00.03                                                                                                                              |
|                        | Dimensions Requested              | 2                                                                                                                                        |
|                        | Cells Available                   | 524245                                                                                                                                   |

**Case Processing Summary**

|               | Cases |         |         |         |       |         |
|---------------|-------|---------|---------|---------|-------|---------|
|               | Valid |         | Missing |         | Total |         |
|               | N     | Percent | N       | Percent | N     | Percent |
| BMIGroup * AF | 156   | 100.0%  | 0       | 0.0%    | 156   | 100.0%  |
| NYHA * AF     | 108   | 69.2%   | 48      | 30.8%   | 156   | 100.0%  |

**BMIGroup \* AF**



**Crosstab**

|          |                   |                   | AF     |        | Total  |
|----------|-------------------|-------------------|--------|--------|--------|
|          |                   |                   | No     | Yes    |        |
| BMIGroup | Underweight       | Count             | 0      | 1      | 1      |
|          |                   | % within BMIGroup | 0.0%   | 100.0% | 100.0% |
|          |                   | % within AF       | 0.0%   | 2.6%   | 0.6%   |
|          | Normal            | Count             | 20     | 9      | 29     |
|          |                   | % within BMIGroup | 69.0%  | 31.0%  | 100.0% |
|          |                   | % within AF       | 16.9%  | 23.7%  | 18.6%  |
|          | Overweight        | Count             | 66     | 17     | 83     |
|          |                   | % within BMIGroup | 79.5%  | 20.5%  | 100.0% |
|          |                   | % within AF       | 55.9%  | 44.7%  | 53.2%  |
|          | Obese             | Count             | 32     | 11     | 43     |
|          |                   | % within BMIGroup | 74.4%  | 25.6%  | 100.0% |
|          |                   | % within AF       | 27.1%  | 28.9%  | 27.6%  |
| Total    | Count             | 118               | 38     | 156    |        |
|          | % within BMIGroup | 75.6%             | 24.4%  | 100.0% |        |
|          | % within AF       | 100.0%            | 100.0% | 100.0% |        |

**Chi-Square Tests**

|                              | Value              | df | Asymptotic Significance (2-sided) |
|------------------------------|--------------------|----|-----------------------------------|
| Pearson Chi-Square           | 4.519 <sup>a</sup> | 3  | .211                              |
| Likelihood Ratio             | 4.227              | 3  | .238                              |
| Linear-by-Linear Association | .614               | 1  | .433                              |
| N of Valid Cases             | 156                |    |                                   |

a. 2 cells (25.0%) have expected count less than 5. The minimum expected count is .24.

**NYHA \* AF**

**Crosstab**

|       |   |               | AF     |        | Total  |
|-------|---|---------------|--------|--------|--------|
|       |   |               | No     | Yes    |        |
| NYHA  | 1 | Count         | 43     | 15     | 58     |
|       |   | % within NYHA | 74.1%  | 25.9%  | 100.0% |
|       |   | % within AF   | 56.6%  | 46.9%  | 53.7%  |
|       | 2 | Count         | 32     | 16     | 48     |
|       |   | % within NYHA | 66.7%  | 33.3%  | 100.0% |
|       |   | % within AF   | 42.1%  | 50.0%  | 44.4%  |
|       | 3 | Count         | 1      | 1      | 2      |
|       |   | % within NYHA | 50.0%  | 50.0%  | 100.0% |
|       |   | % within AF   | 1.3%   | 3.1%   | 1.9%   |
| Total |   | Count         | 76     | 32     | 108    |
|       |   | % within NYHA | 70.4%  | 29.6%  | 100.0% |
|       |   | % within AF   | 100.0% | 100.0% | 100.0% |

**Chi-Square Tests**

|                              | Value              | df | Asymptotic Significance (2-sided) |
|------------------------------|--------------------|----|-----------------------------------|
| Pearson Chi-Square           | 1.109 <sup>a</sup> | 2  | .574                              |
| Likelihood Ratio             | 1.077              | 2  | .584                              |
| Linear-by-Linear Association | 1.032              | 1  | .310                              |
| N of Valid Cases             | 108                |    |                                   |

a. 2 cells (33.3%) have expected count less than 5. The minimum expected count is .59.

DATASET ACTIVATE DataSet1.

```
SAVE OUTFILE='C:\Users\user\Downloads\ImAnisah Statistic & SPSS\TOCO T3\Dat
a toco.sav'
/COMPRESSED.
EXAMINE VARIABLES=LEFTAT_SIZE RIGHTATsize EF BY AF
/PLOT BOXPLOT STEMLEAF NPLOT
/COMPARE GROUPS
/STATISTICS DESCRIPTIVES
/CINTERVAL 95
/MISSING LISTWISE
/NOTOTAL.
```

**Explore**

**Notes**

|                        |                                   |                                                                                                                                                                                               |
|------------------------|-----------------------------------|-----------------------------------------------------------------------------------------------------------------------------------------------------------------------------------------------|
| Output Created         | 01-MAR-2021 14:39:24              |                                                                                                                                                                                               |
| Comments               |                                   |                                                                                                                                                                                               |
| Input                  | Data                              | C:\Users\user\Downloads\ImAnisah<br>Statistic & SPSS\TOCO T3\Data<br>toco.sav                                                                                                                 |
|                        | Active Dataset                    | DataSet1                                                                                                                                                                                      |
|                        | Filter                            | <none>                                                                                                                                                                                        |
|                        | Weight                            | <none>                                                                                                                                                                                        |
|                        | Split File                        | <none>                                                                                                                                                                                        |
|                        | N of Rows in Working Data<br>File | 156                                                                                                                                                                                           |
| Missing Value Handling | Definition of Missing             | User-defined missing values for<br>dependent variables are treated as<br>missing.                                                                                                             |
|                        | Cases Used                        | Statistics are based on cases with<br>no missing values for any dependent<br>variable or factor used.                                                                                         |
| Syntax                 |                                   | EXAMINE<br>VARIABLES=LEFTAT_SIZE<br>RIGHTATsize EF BY AF<br>/PLOT BOXPLOT STEMLEAF<br>NPLOT<br>/COMPARE GROUPS<br>/STATISTICS DESCRIPTIVES<br>/CINTERVAL 95<br>/MISSING LISTWISE<br>/NOTOTAL. |
| Resources              | Processor Time                    | 00:00:06.44                                                                                                                                                                                   |
|                        | Elapsed Time                      | 00:00:06.32                                                                                                                                                                                   |

**AF**

**Case Processing Summary**

|             |     | Cases |         |         |         |       |         |
|-------------|-----|-------|---------|---------|---------|-------|---------|
|             |     | Valid |         | Missing |         | Total |         |
|             |     | N     | Percent | N       | Percent | N     | Percent |
| LEFTAT_SIZE | No  | 66    | 55.9%   | 52      | 44.1%   | 118   | 100.0%  |
|             | Yes | 30    | 78.9%   | 8       | 21.1%   | 38    | 100.0%  |
| RIGHTATsize | No  | 66    | 55.9%   | 52      | 44.1%   | 118   | 100.0%  |
|             | Yes | 30    | 78.9%   | 8       | 21.1%   | 38    | 100.0%  |
| EF          | No  | 66    | 55.9%   | 52      | 44.1%   | 118   | 100.0%  |
|             | Yes | 30    | 78.9%   | 8       | 21.1%   | 38    | 100.0%  |

**Descriptives**

| AF                               |             | Statistic                        | Std. Error  |        |        |
|----------------------------------|-------------|----------------------------------|-------------|--------|--------|
| LEFTAT_SIZE                      | No          | Mean                             | 18.142      | .6128  |        |
|                                  |             | 95% Confidence Interval for Mean | Lower Bound | 16.919 |        |
|                                  |             |                                  | Upper Bound | 19.366 |        |
|                                  |             | 5% Trimmed Mean                  | 17.754      |        |        |
|                                  |             | Median                           | 17.050      |        |        |
|                                  |             | Variance                         | 24.787      |        |        |
|                                  |             | Std. Deviation                   | 4.9787      |        |        |
|                                  |             | Minimum                          | 11.0        |        |        |
|                                  |             | Maximum                          | 34.4        |        |        |
|                                  |             | Range                            | 23.4        |        |        |
|                                  |             | Interquartile Range              | 6.2         |        |        |
|                                  |             | Skewness                         | 1.171       | .295   |        |
|                                  |             | Kurtosis                         | 1.591       | .582   |        |
|                                  |             |                                  | Yes         | Mean   | 18.837 |
| 95% Confidence Interval for Mean | Lower Bound |                                  |             | 17.302 |        |
|                                  | Upper Bound |                                  |             | 20.371 |        |
| 5% Trimmed Mean                  | 18.957      |                                  |             |        |        |
| Median                           | 18.600      |                                  |             |        |        |
| Variance                         | 16.891      |                                  |             |        |        |
| Std. Deviation                   | 4.1099      |                                  |             |        |        |
| Minimum                          | 10.0        |                                  |             |        |        |
| Maximum                          | 26.0        |                                  |             |        |        |
| Range                            | 16.0        |                                  |             |        |        |
| Interquartile Range              | 7.1         |                                  |             |        |        |
| Skewness                         | -.305       |                                  |             | .427   |        |
| Kurtosis                         | -.288       |                                  |             | .833   |        |
| RIGHTATsize                      | No          |                                  |             | Mean   | 14.011 |
|                                  |             | 95% Confidence Interval for Mean | Lower Bound | 13.219 |        |
|                                  |             |                                  | Upper Bound | 14.802 |        |
|                                  |             | 5% Trimmed Mean                  | 13.779      |        |        |
|                                  |             | Median                           | 13.550      |        |        |
|                                  |             | Variance                         | 10.372      |        |        |
|                                  |             | Std. Deviation                   | 3.2205      |        |        |
|                                  |             | Minimum                          | 8.0         |        |        |
|                                  |             | Maximum                          | 25.0        |        |        |
|                                  |             | Range                            | 17.0        |        |        |
|                                  |             | Interquartile Range              | 4.2         |        |        |
|                                  |             | Skewness                         | 1.167       | .295   |        |
|                                  |             | Kurtosis                         | 2.036       | .582   |        |
|                                  |             |                                  | Yes         | Mean   | 14.843 |
| 95% Confidence Interval for Mean | Lower Bound |                                  |             | 13.661 |        |
|                                  | Upper Bound |                                  |             | 16.025 |        |
| 5% Trimmed Mean                  | 14.572      |                                  |             |        |        |

**Descriptives**

| AF                  |                     | Statistic                        | Std. Error  |        |  |
|---------------------|---------------------|----------------------------------|-------------|--------|--|
|                     | Median              | 14.500                           |             |        |  |
|                     | Variance            | 10.022                           |             |        |  |
|                     | Std. Deviation      | 3.1657                           |             |        |  |
|                     | Minimum             | 10.0                             |             |        |  |
|                     | Maximum             | 27.3                             |             |        |  |
|                     | Range               | 17.3                             |             |        |  |
|                     | Interquartile Range | 3.4                              |             |        |  |
|                     | Skewness            | 2.075                            | .427        |        |  |
|                     | Kurtosis            | 7.455                            | .833        |        |  |
| EF                  | No                  | Mean                             | 49.802      | 1.1634 |  |
|                     |                     | 95% Confidence Interval for Mean | Lower Bound | 47.478 |  |
|                     |                     |                                  | Upper Bound | 52.125 |  |
|                     |                     | 5% Trimmed Mean                  | 49.951      |        |  |
|                     |                     | Median                           | 52.500      |        |  |
|                     |                     | Variance                         | 89.339      |        |  |
|                     |                     | Std. Deviation                   | 9.4519      |        |  |
|                     |                     | Minimum                          | 30.0        |        |  |
|                     |                     | Maximum                          | 67.0        |        |  |
|                     |                     | Range                            | 37.0        |        |  |
|                     |                     | Interquartile Range              | 13.3        |        |  |
|                     |                     | Skewness                         | -.366       | .295   |  |
|                     | Kurtosis            | -.778                            | .582        |        |  |
|                     | Yes                 | Mean                             | 49.427      | 1.7542 |  |
|                     |                     | 95% Confidence Interval for Mean | Lower Bound | 45.839 |  |
|                     |                     |                                  | Upper Bound | 53.014 |  |
|                     |                     | 5% Trimmed Mean                  | 49.493      |        |  |
|                     |                     | Median                           | 50.000      |        |  |
|                     |                     | Variance                         | 92.317      |        |  |
|                     |                     | Std. Deviation                   | 9.6081      |        |  |
|                     |                     | Minimum                          | 34.0        |        |  |
|                     |                     | Maximum                          | 64.0        |        |  |
| Range               |                     | 30.0                             |             |        |  |
| Interquartile Range | 16.0                |                                  |             |        |  |
| Skewness            | -.152               | .427                             |             |        |  |
| Kurtosis            | -1.235              | .833                             |             |        |  |

### Tests of Normality

| AF          |     | Kolmogorov-Smirnov <sup>a</sup> |    |                   | Shapiro-Wilk |    |      |
|-------------|-----|---------------------------------|----|-------------------|--------------|----|------|
|             |     | Statistic                       | df | Sig.              | Statistic    | df | Sig. |
| LEFTAT_SIZE | No  | .133                            | 66 | .006              | .918         | 66 | .000 |
|             | Yes | .111                            | 30 | .200 <sup>*</sup> | .958         | 30 | .280 |
| RIGHTATsize | No  | .123                            | 66 | .015              | .926         | 66 | .001 |
|             | Yes | .214                            | 30 | .001              | .826         | 30 | .000 |
| EF          | No  | .132                            | 66 | .006              | .960         | 66 | .031 |
|             | Yes | .120                            | 30 | .200 <sup>*</sup> | .939         | 30 | .087 |

\*. This is a lower bound of the true significance.

a. Lilliefors Significance Correction

## LEFTAT\_SIZE

### Stem-and-Leaf Plots

LEFTAT\_SIZE Stem-and-Leaf Plot for  
AF= No

| Frequency | Stem &   | Leaf      |
|-----------|----------|-----------|
| 2.00      | 11 .     | 00        |
| 5.00      | 12 .     | 01346     |
| 4.00      | 13 .     | 0004      |
| 5.00      | 14 .     | 00034     |
| 9.00      | 15 .     | 000006669 |
| 4.00      | 16 .     | 0004      |
| 6.00      | 17 .     | 000019    |
| 7.00      | 18 .     | 0000006   |
| 5.00      | 19 .     | 00005     |
| 2.00      | 20 .     | 00        |
| 4.00      | 21 .     | 0037      |
| 2.00      | 22 .     | 01        |
| 3.00      | 23 .     | 009       |
| 1.00      | 24 .     | 0         |
| 2.00      | 25 .     | 67        |
| 2.00      | 26 .     | 00        |
| .00       | 27 .     |           |
| .00       | 28 .     |           |
| .00       | 29 .     |           |
| 1.00      | 30 .     | 0         |
| 2.00      | Extremes | (>=33.0)  |

Stem width: 1.0

Each leaf: 1 case(s)

LEFTAT\_SIZE Stem-and-Leaf Plot for  
AF= Yes

| Frequency | Stem & | Leaf   |
|-----------|--------|--------|
| 2.00      | 1 .    | 00     |
| 1.00      | 1 .    | 2      |
| 4.00      | 1 .    | 5555   |
| 4.00      | 1 .    | 6777   |
| 6.00      | 1 .    | 888899 |
| 5.00      | 2 .    | 00001  |
| 3.00      | 2 .    | 333    |
| 4.00      | 2 .    | 4444   |
| 1.00      | 2 .    | 6      |

Stem width: 10.0  
Each leaf: 1 case(s)

## Normal Q-Q Plots

### Normal Q-Q Plot of LEFTAT\_SIZE

for AF= No

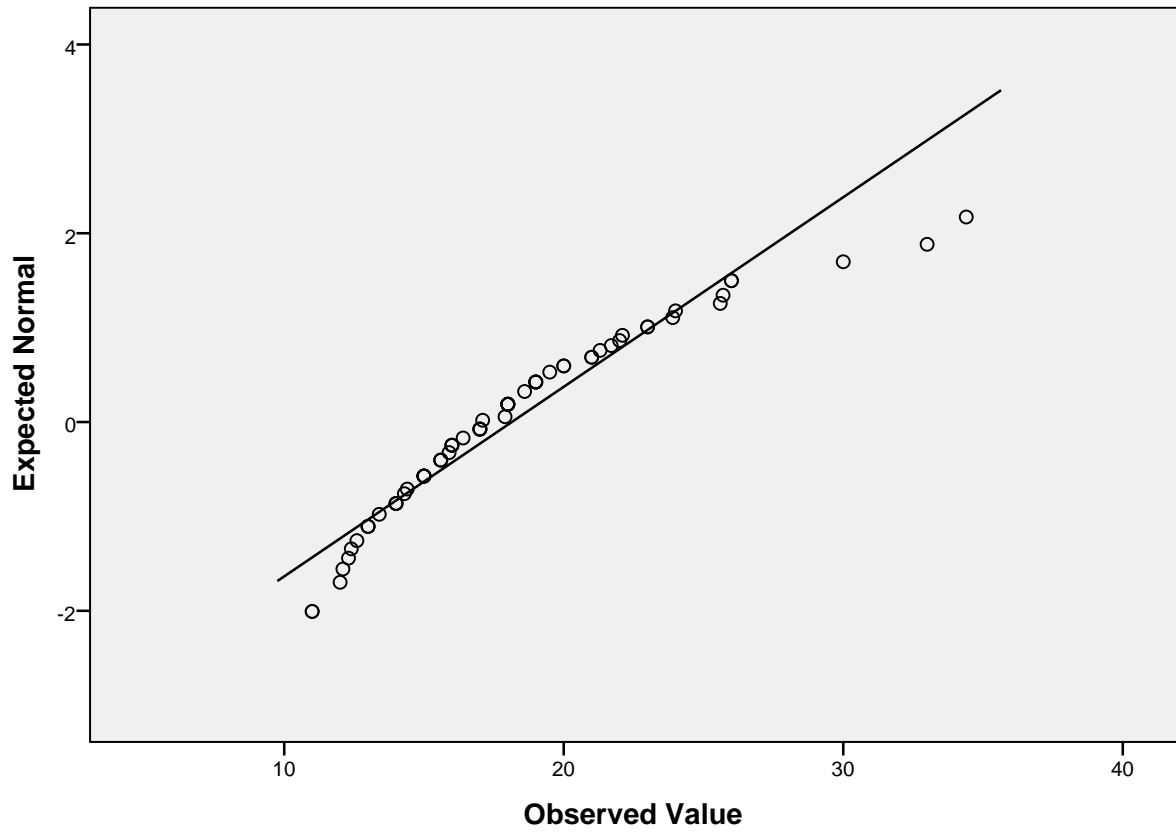



### Normal Q-Q Plot of LEFTAT\_SIZE

for AF= Yes

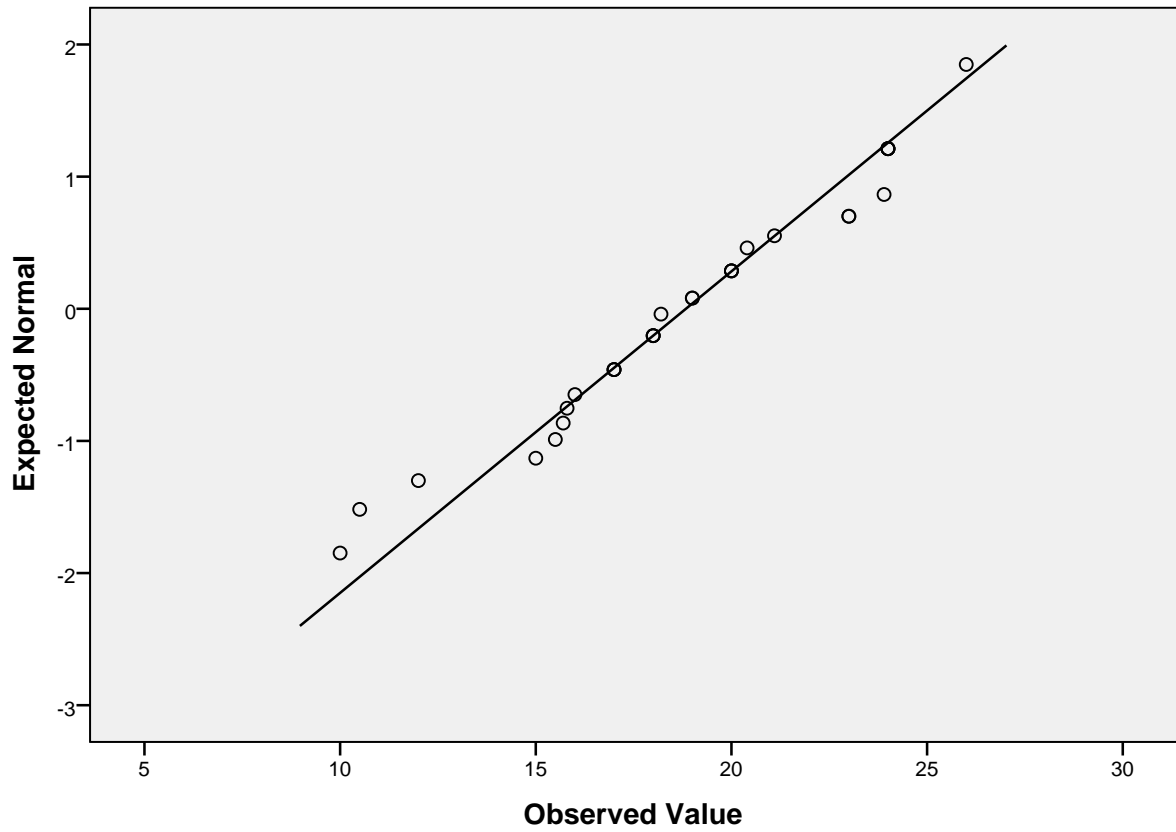

### Detrended Normal Q-Q Plots

### Detrended Normal Q-Q Plot of LEFTAT\_SIZE

for AF= No

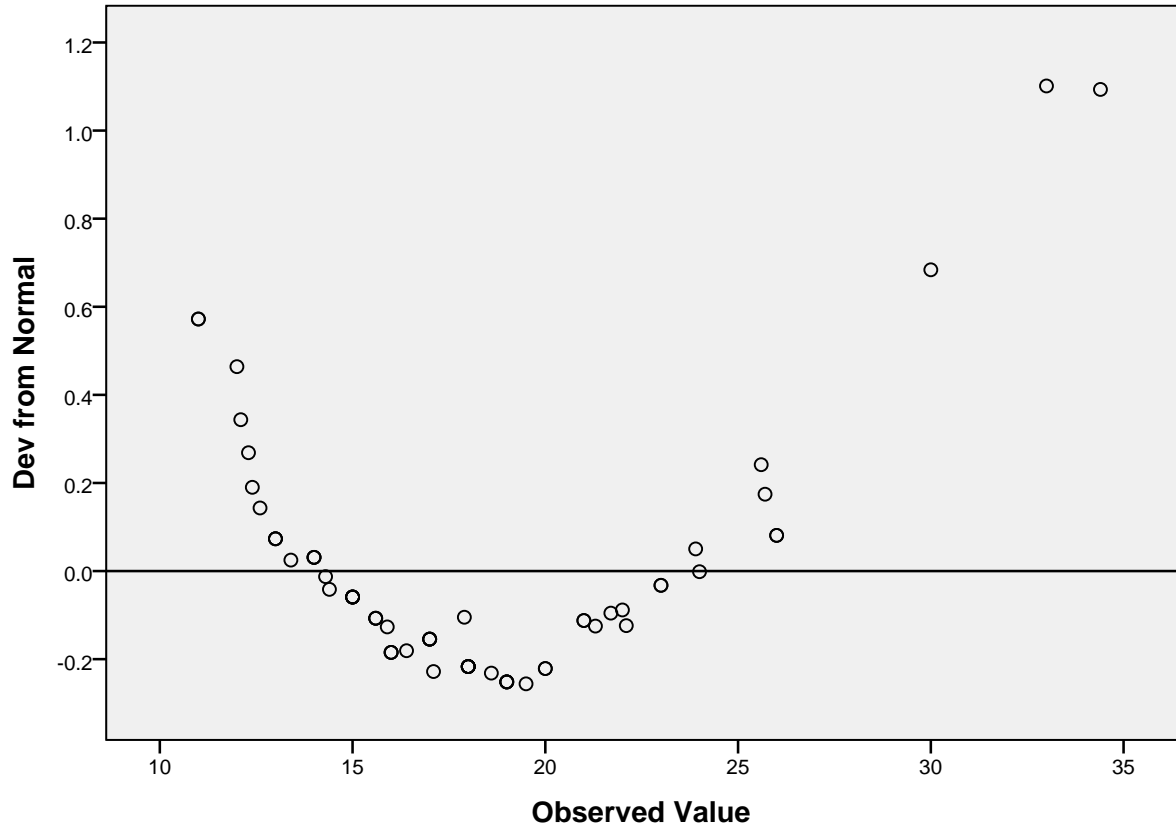

**Detrended Normal Q-Q Plot of LEFTAT\_SIZE**

for AF= Yes

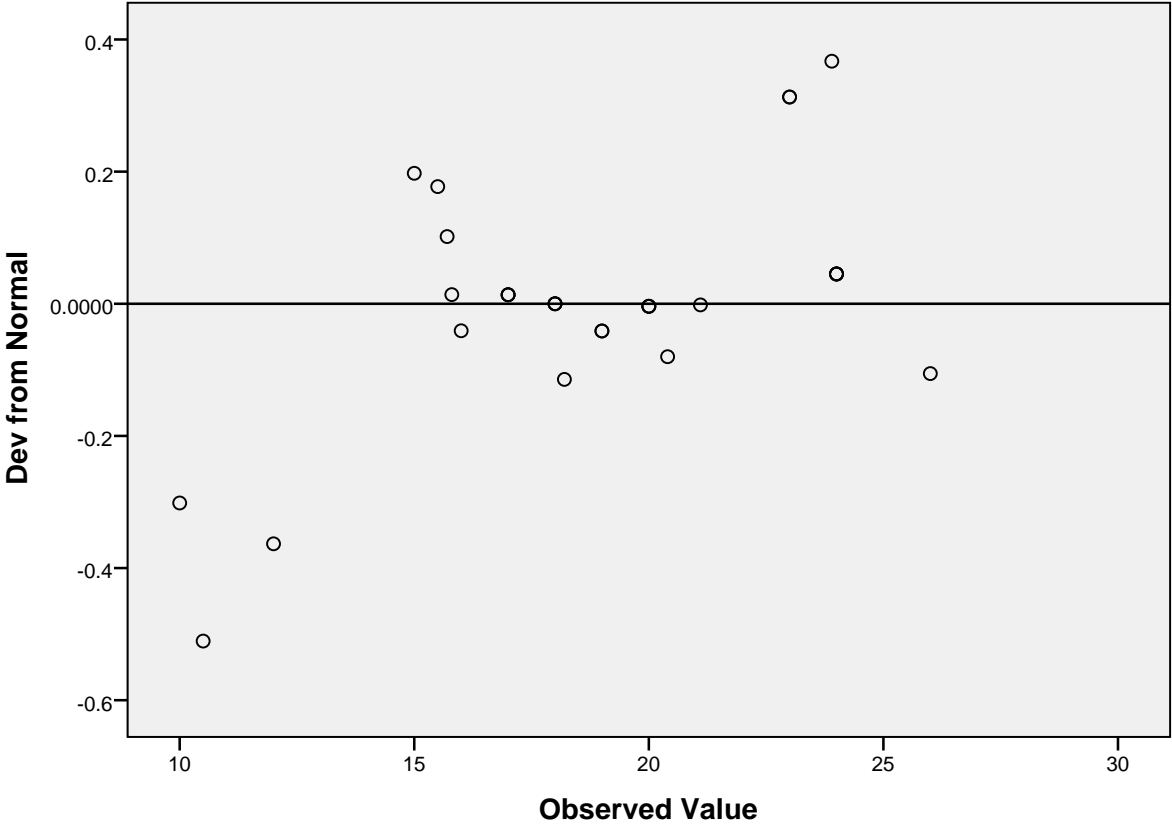

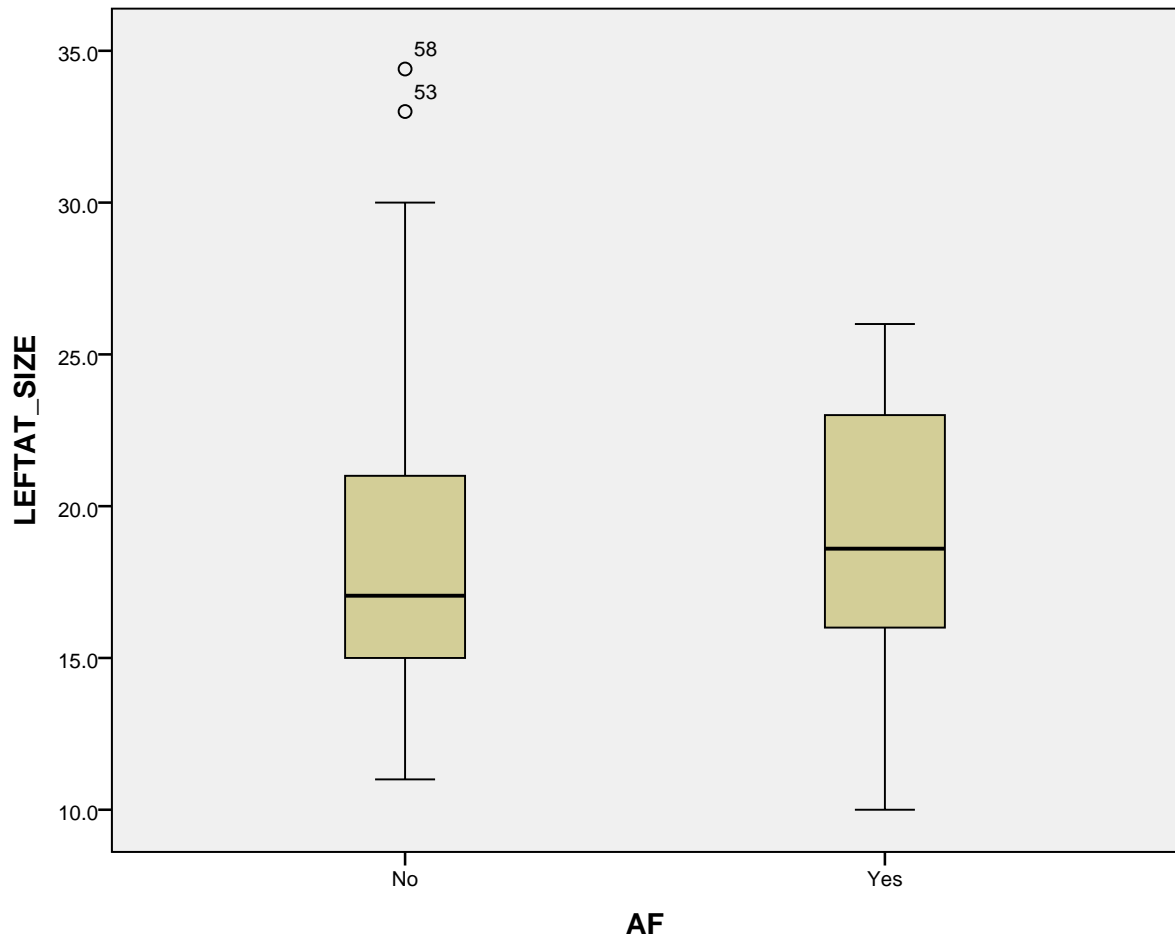

## RIGHTATsize

### Stem-and-Leaf Plots

RIGHTATsize Stem-and-Leaf Plot for  
AF= No

| Frequency | Stem & | Leaf        |
|-----------|--------|-------------|
| 1.00      | 8 .    | 0           |
| 2.00      | 9 .    | 89          |
| 3.00      | 10 .   | 003         |
| 11.00     | 11 .   | 00000035678 |
| 10.00     | 12 .   | 0000003459  |
| 7.00      | 13 .   | 0000447     |
| 9.00      | 14 .   | 000000078   |
| 6.00      | 15 .   | 000025      |
| 6.00      | 16 .   | 000004      |
| 4.00      | 17 .   | 0000        |
| 1.00      | 18 .   | 0           |
| 3.00      | 19 .   | 045         |

```
1.00      20 . 7
2.00 Extremes    (>=24.0)
```

```
Stem width:      1.0
Each leaf:       1 case(s)
```

RIGHTATsize Stem-and-Leaf Plot for  
AF= Yes

```
Frequency      Stem & Leaf

 1.00         10 . 0
 1.00         11 . 1
 5.00         12 . 00004
 3.00         13 . 009
 5.00         14 . 00000
 7.00         15 . 0000000
 2.00         16 . 09
 2.00         17 . 07
 3.00         18 . 000
 1.00 Extremes    (>=27.3)
```

```
Stem width:      1.0
Each leaf:       1 case(s)
```

## Normal Q-Q Plots

### Normal Q-Q Plot of RIGHTATsize

for AF= No

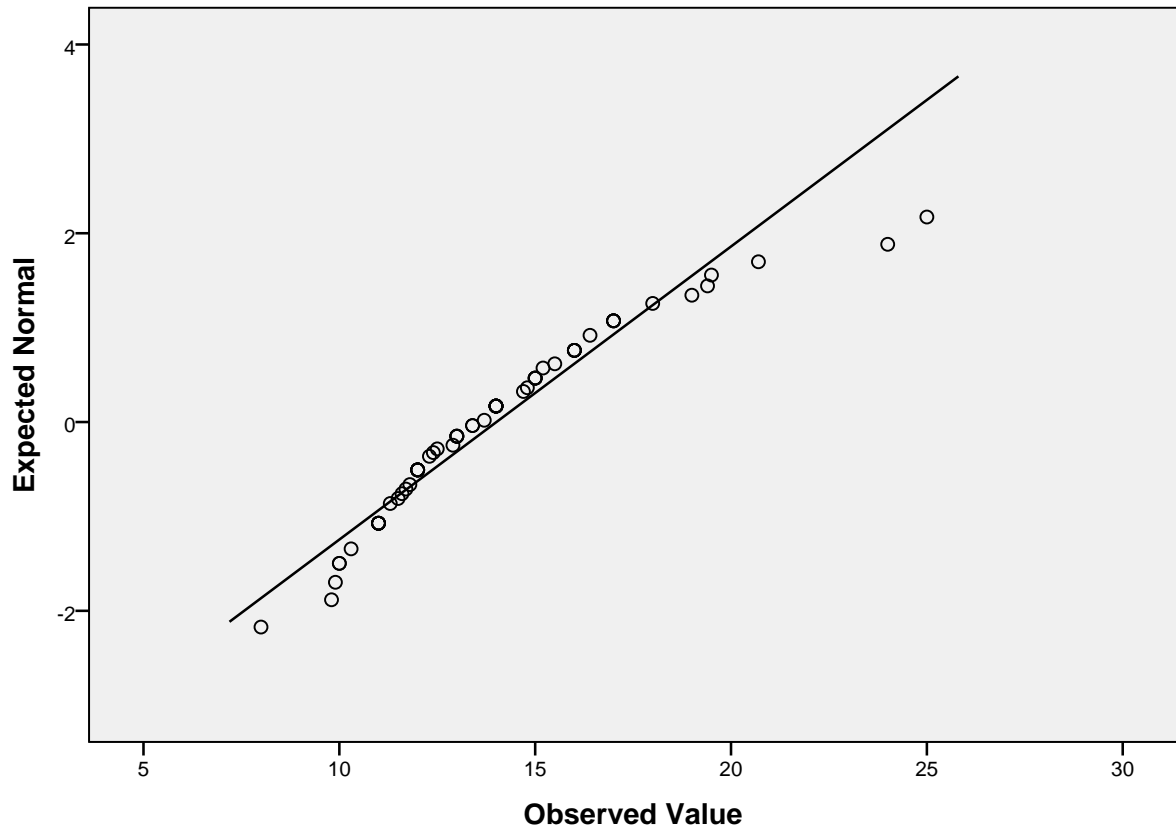

### Normal Q-Q Plot of RIGHTATsize

for AF= Yes

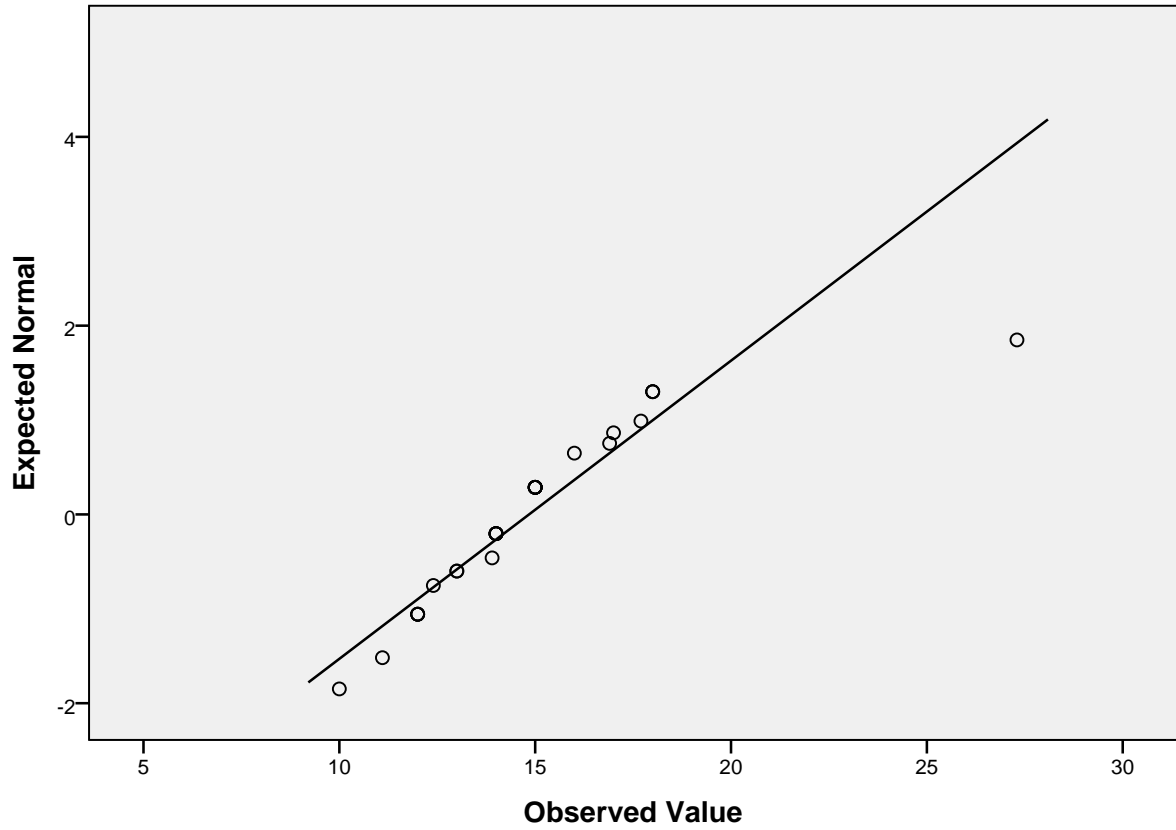

### Detrended Normal Q-Q Plots

### Detrended Normal Q-Q Plot of RIGHTATsize

for AF= No

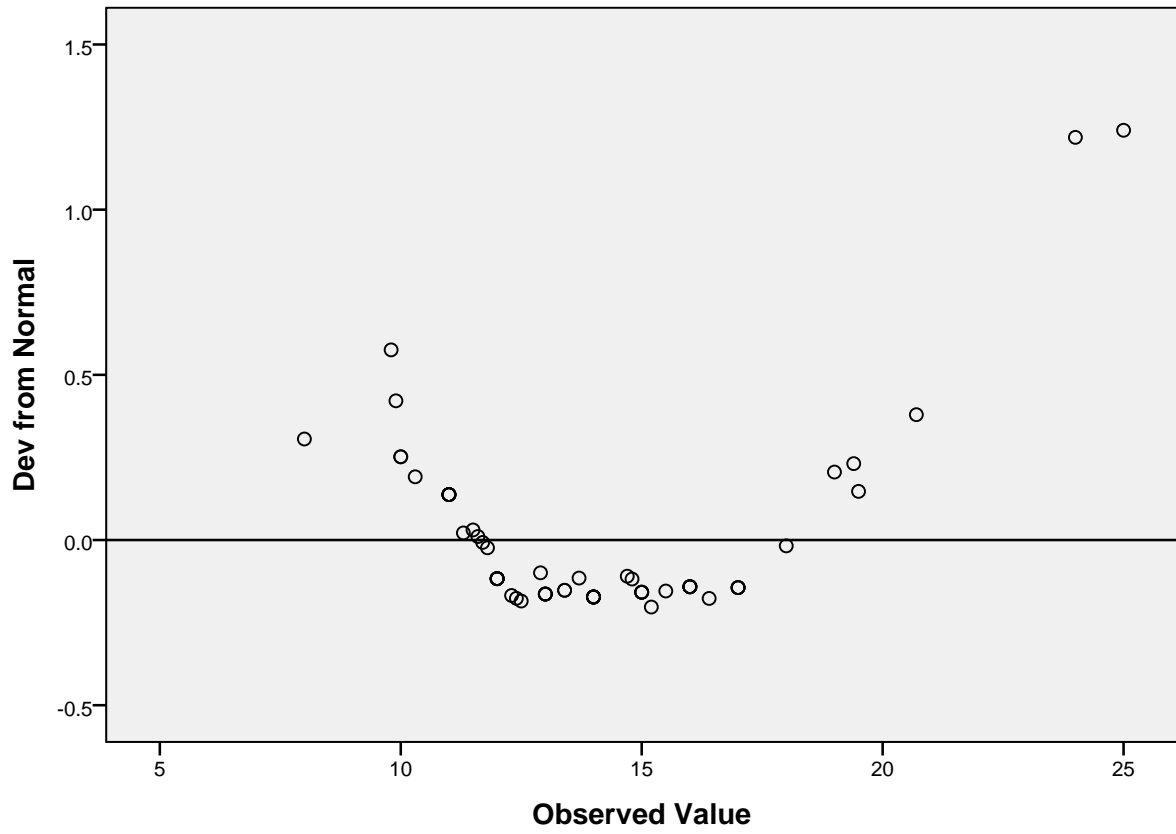



### Detrended Normal Q-Q Plot of RIGHTATsize

for AF= Yes

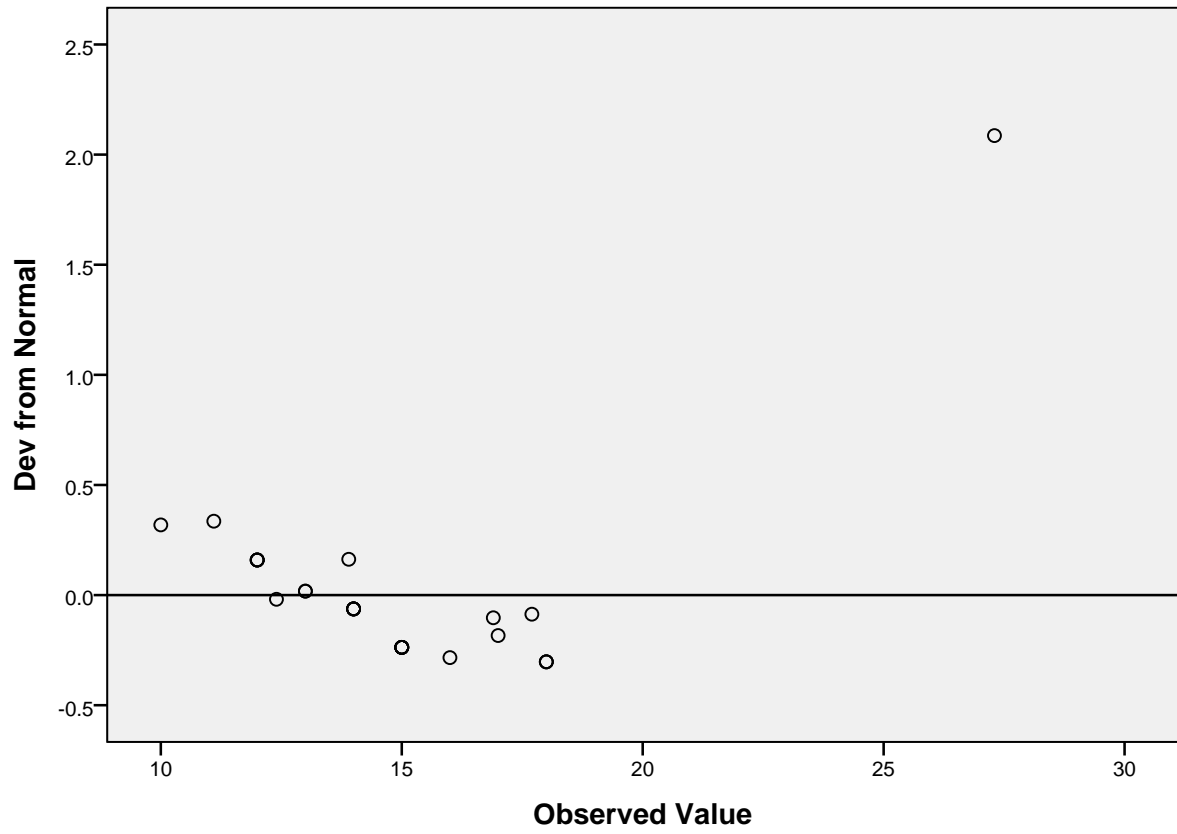

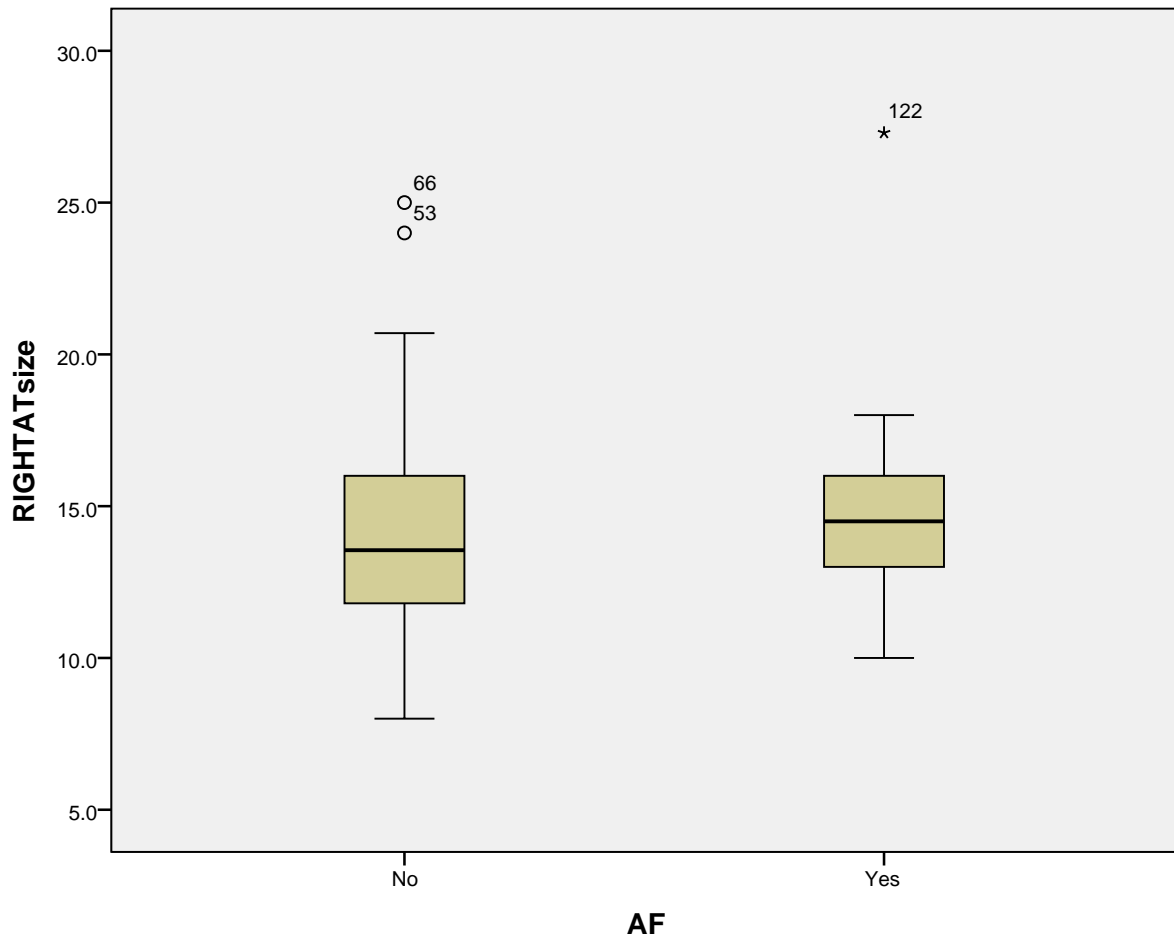

## EF

### Stem-and-Leaf Plots

EF Stem-and-Leaf Plot for  
AF= No

| Frequency | Stem & | Leaf    |
|-----------|--------|---------|
| 2.00      | 3 .    | 01      |
| 2.00      | 3 .    | 23      |
| 3.00      | 3 .    | 455     |
| 2.00      | 3 .    | 67      |
| 4.00      | 3 .    | 8999    |
| 1.00      | 4 .    | 1       |
| 2.00      | 4 .    | 23      |
| 7.00      | 4 .    | 4455555 |
| 4.00      | 4 .    | 6777    |
| 3.00      | 4 .    | 888     |
| 2.00      | 5 .    | 01      |
| 5.00      | 5 .    | 23333   |

|       |     |             |
|-------|-----|-------------|
| 5.00  | 5 . | 44555       |
| 11.00 | 5 . | 66666777777 |
| 3.00  | 5 . | 888         |
| 5.00  | 6 . | 00001       |
| 2.00  | 6 . | 23          |
| 1.00  | 6 . | 5           |
| 2.00  | 6 . | 67          |

Stem width: 10.0  
Each leaf: 1 case(s)

EF Stem-and-Leaf Plot for  
AF= Yes

| Frequency | Stem & | Leaf   |
|-----------|--------|--------|
| 2.00      | 3 .    | 44     |
| 5.00      | 3 .    | 66779  |
| 4.00      | 4 .    | 2344   |
| 3.00      | 4 .    | 789    |
| 5.00      | 5 .    | 00223  |
| 6.00      | 5 .    | 667789 |
| 5.00      | 6 .    | 02334  |

Stem width: 10.0  
Each leaf: 1 case(s)

## Normal Q-Q Plots

### Normal Q-Q Plot of EF

for AF= No

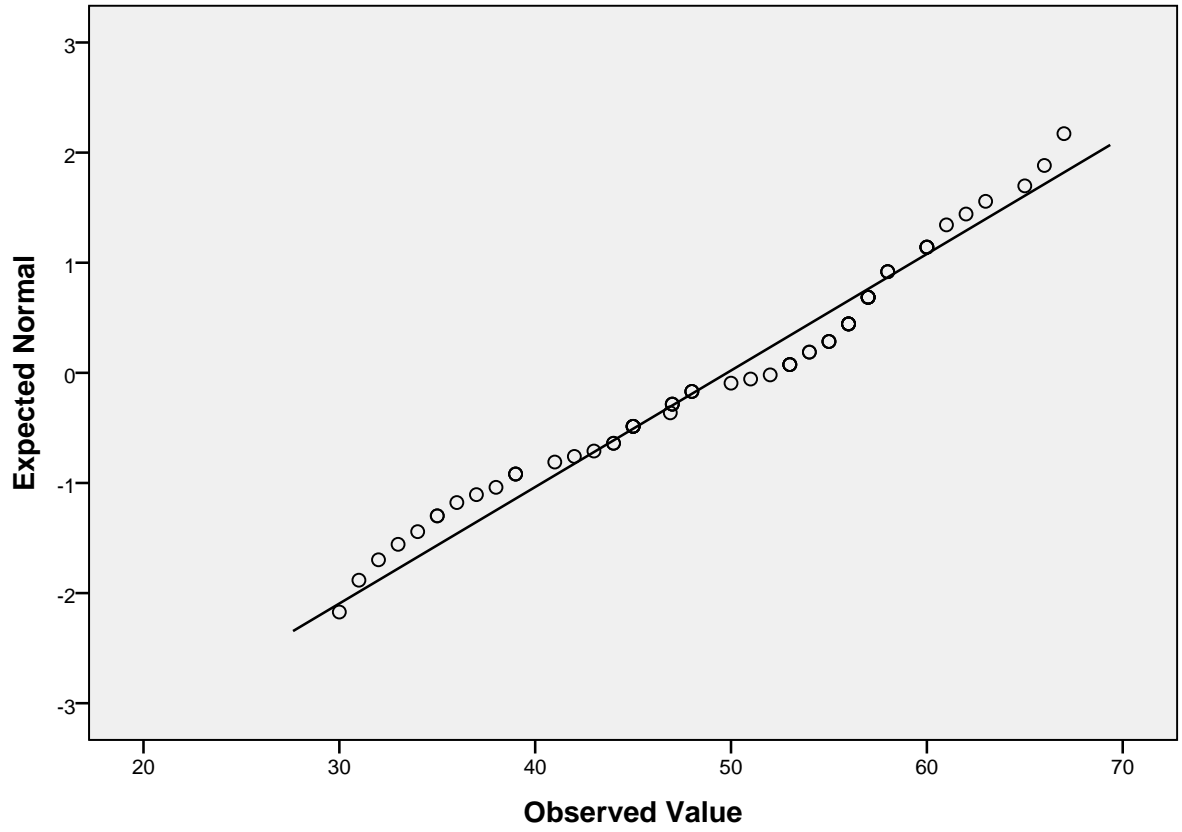

### Normal Q-Q Plot of EF

for AF= Yes

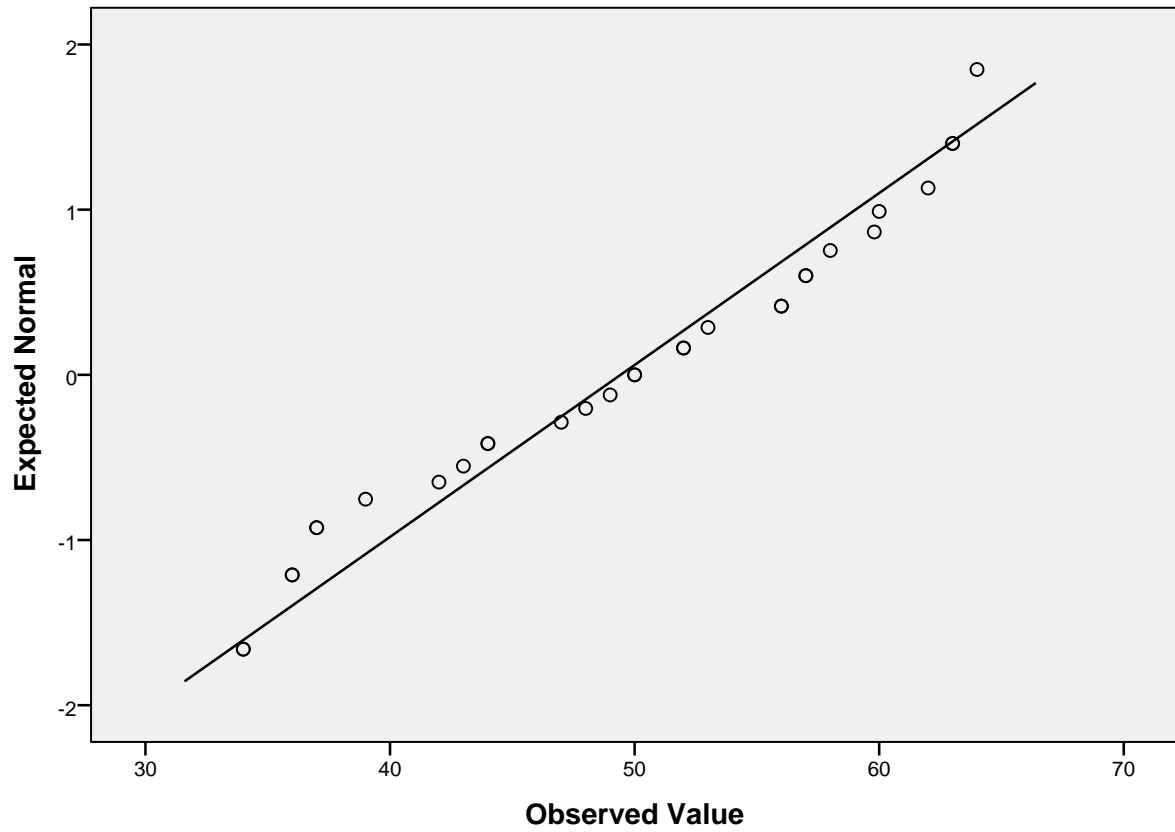

### Detrended Normal Q-Q Plots

### Detrended Normal Q-Q Plot of EF

for AF= No

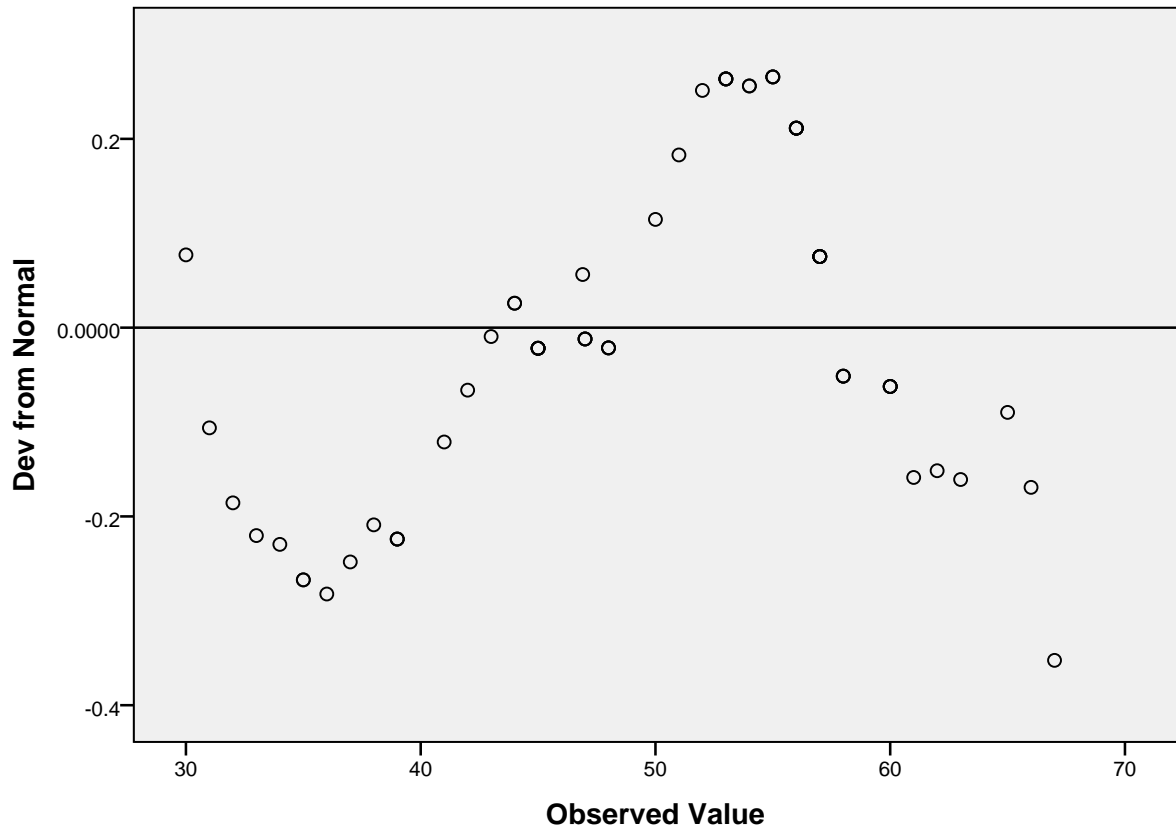

### Detrended Normal Q-Q Plot of EF

for AF= Yes

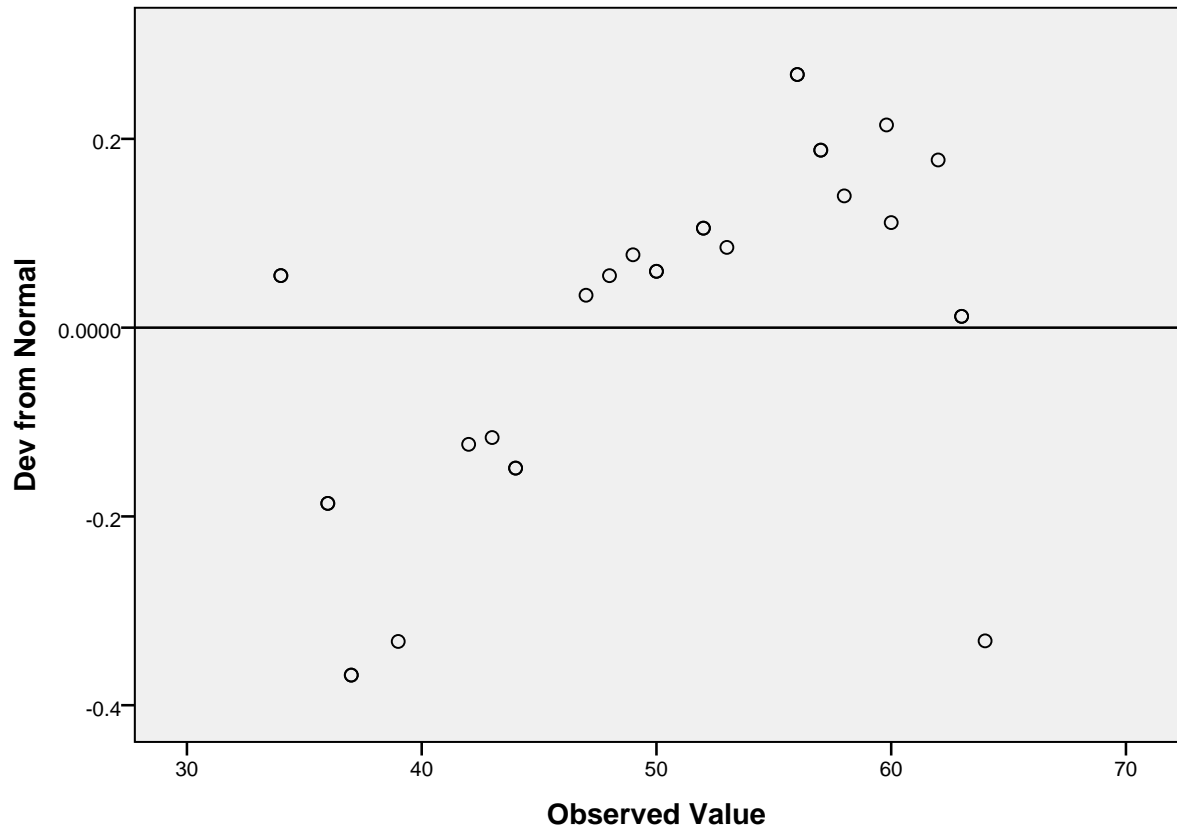

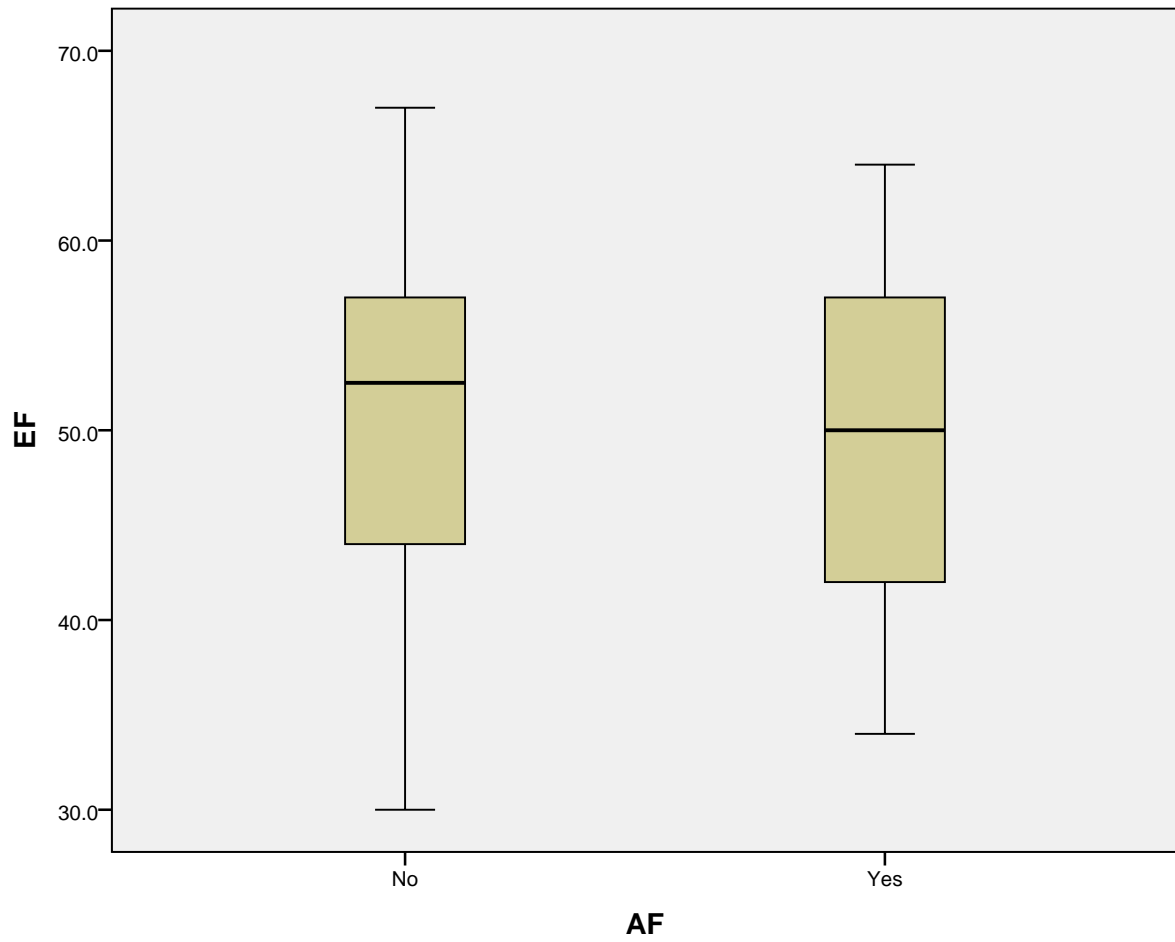

```
T-TEST GROUPS=AF(0 1)  
/MISSING=ANALYSIS  
/VARIABLES=EF  
/CRITERIA=CI(.95).
```

## T-Test



**Notes**

|                        |                                                                                   |                                                                                                                            |
|------------------------|-----------------------------------------------------------------------------------|----------------------------------------------------------------------------------------------------------------------------|
| Output Created         | 01-MAR-2021 14:39:59                                                              |                                                                                                                            |
| Comments               |                                                                                   |                                                                                                                            |
| Input                  | Data                                                                              | C:\Users\user\Downloads\ImAnisah Statistic & SPSS\TOCO T3\Data toco.sav                                                    |
|                        | Active Dataset                                                                    | DataSet1                                                                                                                   |
|                        | Filter                                                                            | <none>                                                                                                                     |
|                        | Weight                                                                            | <none>                                                                                                                     |
|                        | Split File                                                                        | <none>                                                                                                                     |
|                        | N of Rows in Working Data File                                                    | 156                                                                                                                        |
| Missing Value Handling | Definition of Missing                                                             | User defined missing values are treated as missing.                                                                        |
|                        | Cases Used                                                                        | Statistics for each analysis are based on the cases with no missing or out-of-range data for any variable in the analysis. |
| Syntax                 | T-TEST GROUPS=AF(0 1)<br>/MISSING=ANALYSIS<br>/VARIABLES=EF<br>/CRITERIA=CI(.95). |                                                                                                                            |
| Resources              | Processor Time                                                                    | 00:00:00.00                                                                                                                |
|                        | Elapsed Time                                                                      | 00:00:00.02                                                                                                                |

**Group Statistics**

|    | AF  | N  | Mean   | Std. Deviation | Std. Error Mean |
|----|-----|----|--------|----------------|-----------------|
| EF | No  | 78 | 50.255 | 9.3082         | 1.0540          |
|    | Yes | 33 | 48.903 | 9.7985         | 1.7057          |

**Independent Samples Test**

|    |                             | Levene's Test for Equality of Variances |      | t-test for Equality of Means |        |                 |                 |                       |                                           |        |
|----|-----------------------------|-----------------------------------------|------|------------------------------|--------|-----------------|-----------------|-----------------------|-------------------------------------------|--------|
|    |                             | F                                       | Sig. | t                            | df     | Sig. (2-tailed) | Mean Difference | Std. Error Difference | 95% Confidence Interval of the Difference |        |
|    |                             |                                         |      |                              |        |                 |                 |                       | Lower                                     | Upper  |
| EF | Equal variances assumed     | .078                                    | .780 | .689                         | 109    | .493            | 1.3521          | 1.9634                | -2.5393                                   | 5.2435 |
|    | Equal variances not assumed |                                         |      | .674                         | 57.610 | .503            | 1.3521          | 2.0050                | -2.6620                                   | 5.3662 |

**NPAR TESTS**

```

/M-W= RIGHTATsize LEFTAT_SIZE BY AF(0 1)
/STATISTICS=DESCRIPTIVES
/MISSING ANALYSIS.

```

**NPar Tests**

**Notes**

|                        |                                                                                                                |                                                                                                        |
|------------------------|----------------------------------------------------------------------------------------------------------------|--------------------------------------------------------------------------------------------------------|
| Output Created         | 01-MAR-2021 14:40:19                                                                                           |                                                                                                        |
| Comments               |                                                                                                                |                                                                                                        |
| Input                  | Data                                                                                                           | C:\Users\user\Downloads\ImAnisah Statistic & SPSS\TOCO T3\Data toco.sav                                |
|                        | Active Dataset                                                                                                 | DataSet1                                                                                               |
|                        | Filter                                                                                                         | <none>                                                                                                 |
|                        | Weight                                                                                                         | <none>                                                                                                 |
|                        | Split File                                                                                                     | <none>                                                                                                 |
|                        | N of Rows in Working Data File                                                                                 | 156                                                                                                    |
| Missing Value Handling | Definition of Missing                                                                                          | User-defined missing values are treated as missing.                                                    |
|                        | Cases Used                                                                                                     | Statistics for each test are based on all cases with valid data for the variable(s) used in that test. |
| Syntax                 | <pre> NPAR TESTS   /M-W= RIGHTATsize LEFTAT_SIZE BY AF(0 1) /STATISTICS=DESCRIPTIVES /MISSING ANALYSIS. </pre> |                                                                                                        |
| Resources              | Processor Time                                                                                                 | 00:00:00.03                                                                                            |
|                        | Elapsed Time                                                                                                   | 00:00:00.02                                                                                            |
|                        | Number of Cases Allowed <sup>a</sup>                                                                           | 393216                                                                                                 |

a. Based on availability of workspace memory.

**Descriptive Statistics**

|             | N   | Mean   | Std. Deviation | Minimum | Maximum |
|-------------|-----|--------|----------------|---------|---------|
| RIGHTATsize | 96  | 14.271 | 3.2103         | 8.0     | 27.3    |
| LEFTAT_SIZE | 100 | 18.615 | 5.1879         | 10.0    | 39.0    |
| AF          | 156 | .24    | .431           | 0       | 1       |

**Mann-Whitney Test**

**Ranks**

|             | AF    | N   | Mean Rank | Sum of Ranks |
|-------------|-------|-----|-----------|--------------|
| RIGHTATsize | No    | 66  | 45.59     | 3009.00      |
|             | Yes   | 30  | 54.90     | 1647.00      |
|             | Total | 96  |           |              |
| LEFTAT_SIZE | No    | 69  | 47.53     | 3279.50      |
|             | Yes   | 31  | 57.11     | 1770.50      |
|             | Total | 100 |           |              |

**Test Statistics<sup>a</sup>**

|                        | RIGHTATsize | LEFTAT_SIZE |
|------------------------|-------------|-------------|
| Mann-Whitney U         | 798.000     | 864.500     |
| Wilcoxon W             | 3009.000    | 3279.500    |
| Z                      | -1.522      | -1.529      |
| Asymp. Sig. (2-tailed) | .128        | .126        |

a. Grouping Variable: AF

**CROSSTABS**

```

/TABLES=DM HPT ASTHMA COPD CKD HYPERCHOL Smokergrp alcoholgrp BY AF
/FORMAT=AVALUE TABLES
/STATISTICS=CHISQ
/CELLS=COUNT ROW COLUMN
/COUNT ROUND CELL.

```

**Crosstabs**

**Notes**

|                        |                                                                                                                                                                                       |                                                                                                                                          |
|------------------------|---------------------------------------------------------------------------------------------------------------------------------------------------------------------------------------|------------------------------------------------------------------------------------------------------------------------------------------|
| Output Created         | 01-MAR-2021 14:42:19                                                                                                                                                                  |                                                                                                                                          |
| Comments               |                                                                                                                                                                                       |                                                                                                                                          |
| Input                  | Data                                                                                                                                                                                  | C:\Users\user\Downloads\ImAnisah<br>Statistic & SPSS\TOCO T3\Data<br>toco.sav                                                            |
|                        | Active Dataset                                                                                                                                                                        | DataSet1                                                                                                                                 |
|                        | Filter                                                                                                                                                                                | <none>                                                                                                                                   |
|                        | Weight                                                                                                                                                                                | <none>                                                                                                                                   |
|                        | Split File                                                                                                                                                                            | <none>                                                                                                                                   |
|                        | N of Rows in Working Data<br>File                                                                                                                                                     | 156                                                                                                                                      |
| Missing Value Handling | Definition of Missing                                                                                                                                                                 | User-defined missing values are<br>treated as missing.                                                                                   |
|                        | Cases Used                                                                                                                                                                            | Statistics for each table are based<br>on all the cases with valid data in the<br>specified range(s) for all variables in<br>each table. |
| Syntax                 | CROSSTABS<br>/TABLES=DM HPT ASTHMA<br>COPD CKD HYPERCHOL<br>Smokergrp alcoholgrp BY AF<br>/FORMAT=AVALUE TABLES<br>/STATISTICS=CHISQ<br>/CELLS=COUNT ROW COLUMN<br>/COUNT ROUND CELL. |                                                                                                                                          |
| Resources              | Processor Time                                                                                                                                                                        | 00:00:00.03                                                                                                                              |
|                        | Elapsed Time                                                                                                                                                                          | 00:00:00.06                                                                                                                              |

**Notes**

|                      |        |
|----------------------|--------|
| Dimensions Requested | 2      |
| Cells Available      | 524245 |

**Case Processing Summary**

|                 | Cases |         |         |         |       |         |
|-----------------|-------|---------|---------|---------|-------|---------|
|                 | Valid |         | Missing |         | Total |         |
|                 | N     | Percent | N       | Percent | N     | Percent |
| DM * AF         | 117   | 75.0%   | 39      | 25.0%   | 156   | 100.0%  |
| HPT * AF        | 116   | 74.4%   | 40      | 25.6%   | 156   | 100.0%  |
| ASTHMA * AF     | 116   | 74.4%   | 40      | 25.6%   | 156   | 100.0%  |
| COPD * AF       | 116   | 74.4%   | 40      | 25.6%   | 156   | 100.0%  |
| CKD * AF        | 115   | 73.7%   | 41      | 26.3%   | 156   | 100.0%  |
| HYPERCHOL * AF  | 114   | 73.1%   | 42      | 26.9%   | 156   | 100.0%  |
| Smokergrp * AF  | 107   | 68.6%   | 49      | 31.4%   | 156   | 100.0%  |
| alcoholgrp * AF | 99    | 63.5%   | 57      | 36.5%   | 156   | 100.0%  |

**DM \* AF**

**Crosstab**

|       |             |             | AF     |        | Total  |
|-------|-------------|-------------|--------|--------|--------|
|       |             |             | No     | Yes    |        |
| DM    | No          | Count       | 22     | 13     | 35     |
|       |             | % within DM | 62.9%  | 37.1%  | 100.0% |
|       |             | % within AF | 27.2%  | 36.1%  | 29.9%  |
|       | Yes         | Count       | 59     | 23     | 82     |
|       |             | % within DM | 72.0%  | 28.0%  | 100.0% |
|       |             | % within AF | 72.8%  | 63.9%  | 70.1%  |
| Total | Count       | 81          | 36     | 117    |        |
|       | % within DM | 69.2%       | 30.8%  | 100.0% |        |
|       | % within AF | 100.0%      | 100.0% | 100.0% |        |

**Chi-Square Tests**

|                                    | Value             | df | Asymptotic Significance (2-sided) | Exact Sig. (2-sided) | Exact Sig. (1-sided) |
|------------------------------------|-------------------|----|-----------------------------------|----------------------|----------------------|
| Pearson Chi-Square                 | .952 <sup>a</sup> | 1  | .329                              | .384                 | .223                 |
| Continuity Correction <sup>b</sup> | .573              | 1  | .449                              |                      |                      |
| Likelihood Ratio                   | .935              | 1  | .334                              |                      |                      |
| Fisher's Exact Test                |                   |    |                                   |                      |                      |
| Linear-by-Linear Association       | .944              | 1  | .331                              |                      |                      |
| N of Valid Cases                   | 117               |    |                                   |                      |                      |

a. 0 cells (0.0%) have expected count less than 5. The minimum expected count is 10.77.

b. Computed only for a 2x2 table

**HPT \* AF**

**Crosstab**

|       |       |              | AF     |        | Total  |
|-------|-------|--------------|--------|--------|--------|
|       |       |              | No     | Yes    |        |
| HPT   | No    | Count        | 14     | 6      | 20     |
|       |       | % within HPT | 70.0%  | 30.0%  | 100.0% |
|       |       | % within AF  | 17.3%  | 17.1%  | 17.2%  |
| Yes   | Yes   | Count        | 67     | 29     | 96     |
|       |       | % within HPT | 69.8%  | 30.2%  | 100.0% |
|       |       | % within AF  | 82.7%  | 82.9%  | 82.8%  |
| Total | Total | Count        | 81     | 35     | 116    |
|       |       | % within HPT | 69.8%  | 30.2%  | 100.0% |
|       |       | % within AF  | 100.0% | 100.0% | 100.0% |

**Chi-Square Tests**

|                                    | Value             | df | Asymptotic Significance (2-sided) | Exact Sig. (2-sided) | Exact Sig. (1-sided) |
|------------------------------------|-------------------|----|-----------------------------------|----------------------|----------------------|
| Pearson Chi-Square                 | .000 <sup>a</sup> | 1  | .985                              | 1.000                | .607                 |
| Continuity Correction <sup>b</sup> | .000              | 1  | 1.000                             |                      |                      |
| Likelihood Ratio                   | .000              | 1  | .985                              |                      |                      |
| Fisher's Exact Test                |                   |    |                                   |                      |                      |
| Linear-by-Linear Association       | .000              | 1  | .985                              |                      |                      |
| N of Valid Cases                   | 116               |    |                                   |                      |                      |

a. 0 cells (0.0%) have expected count less than 5. The minimum expected count is 6.03.

b. Computed only for a 2x2 table

**ASTHMA \* AF**

**Crosstab**

|        |                 |                 | AF     |        | Total  |
|--------|-----------------|-----------------|--------|--------|--------|
|        |                 |                 | No     | Yes    |        |
| ASTHMA | No              | Count           | 80     | 35     | 115    |
|        |                 | % within ASTHMA | 69.6%  | 30.4%  | 100.0% |
|        |                 | % within AF     | 98.8%  | 100.0% | 99.1%  |
|        | Yes             | Count           | 1      | 0      | 1      |
|        |                 | % within ASTHMA | 100.0% | 0.0%   | 100.0% |
|        |                 | % within AF     | 1.2%   | 0.0%   | 0.9%   |
| Total  | Count           | 81              | 35     | 116    |        |
|        | % within ASTHMA | 69.8%           | 30.2%  | 100.0% |        |
|        | % within AF     | 100.0%          | 100.0% | 100.0% |        |

**Chi-Square Tests**

|                                    | Value             | df | Asymptotic Significance (2-sided) | Exact Sig. (2-sided) | Exact Sig. (1-sided) |
|------------------------------------|-------------------|----|-----------------------------------|----------------------|----------------------|
| Pearson Chi-Square                 | .436 <sup>a</sup> | 1  | .509                              | 1.000                | .698                 |
| Continuity Correction <sup>b</sup> | .000              | 1  | 1.000                             |                      |                      |
| Likelihood Ratio                   | .722              | 1  | .395                              |                      |                      |
| Fisher's Exact Test                |                   |    |                                   |                      |                      |
| Linear-by-Linear Association       | .432              | 1  | .511                              |                      |                      |
| N of Valid Cases                   | 116               |    |                                   |                      |                      |

a. 2 cells (50.0%) have expected count less than 5. The minimum expected count is .30.

b. Computed only for a 2x2 table

**COPD \* AF****Crosstab**

|       |               |               | AF     |        | Total  |
|-------|---------------|---------------|--------|--------|--------|
|       |               |               | No     | Yes    |        |
| COPD  | No            | Count         | 79     | 35     | 114    |
|       |               | % within COPD | 69.3%  | 30.7%  | 100.0% |
|       |               | % within AF   | 97.5%  | 100.0% | 98.3%  |
|       | Yes           | Count         | 2      | 0      | 2      |
|       |               | % within COPD | 100.0% | 0.0%   | 100.0% |
|       |               | % within AF   | 2.5%   | 0.0%   | 1.7%   |
| Total | Count         | 81            | 35     | 116    |        |
|       | % within COPD | 69.8%         | 30.2%  | 100.0% |        |
|       | % within AF   | 100.0%        | 100.0% | 100.0% |        |

**Chi-Square Tests**

|                                    | Value             | df | Asymptotic Significance (2-sided) | Exact Sig. (2-sided) | Exact Sig. (1-sided) |
|------------------------------------|-------------------|----|-----------------------------------|----------------------|----------------------|
| Pearson Chi-Square                 | .879 <sup>a</sup> | 1  | .348                              | 1.000                | .486                 |
| Continuity Correction <sup>b</sup> | .026              | 1  | .872                              |                      |                      |
| Likelihood Ratio                   | 1.452             | 1  | .228                              |                      |                      |
| Fisher's Exact Test                |                   |    |                                   |                      |                      |
| Linear-by-Linear Association       | .872              | 1  | .350                              |                      |                      |
| N of Valid Cases                   | 116               |    |                                   |                      |                      |

a. 2 cells (50.0%) have expected count less than 5. The minimum expected count is .60.

b. Computed only for a 2x2 table

**CKD \* AF**

**Crosstab**

|       |     |              | AF     |        | Total  |
|-------|-----|--------------|--------|--------|--------|
|       |     |              | No     | Yes    |        |
| CKD   | No  | Count        | 70     | 30     | 100    |
|       |     | % within CKD | 70.0%  | 30.0%  | 100.0% |
|       |     | % within AF  | 87.5%  | 85.7%  | 87.0%  |
|       | Yes | Count        | 10     | 5      | 15     |
|       |     | % within CKD | 66.7%  | 33.3%  | 100.0% |
|       |     | % within AF  | 12.5%  | 14.3%  | 13.0%  |
| Total |     | Count        | 80     | 35     | 115    |
|       |     | % within CKD | 69.6%  | 30.4%  | 100.0% |
|       |     | % within AF  | 100.0% | 100.0% | 100.0% |

**Chi-Square Tests**

|                                    | Value             | df | Asymptotic Significance (2-sided) | Exact Sig. (2-sided) | Exact Sig. (1-sided) |
|------------------------------------|-------------------|----|-----------------------------------|----------------------|----------------------|
| Pearson Chi-Square                 | .068 <sup>a</sup> | 1  | .794                              | .771                 | .504                 |
| Continuity Correction <sup>b</sup> | .000              | 1  | 1.000                             |                      |                      |
| Likelihood Ratio                   | .067              | 1  | .795                              |                      |                      |
| Fisher's Exact Test                |                   |    |                                   |                      |                      |
| Linear-by-Linear Association       | .068              | 1  | .794                              |                      |                      |
| N of Valid Cases                   | 115               |    |                                   |                      |                      |

a. 1 cells (25.0%) have expected count less than 5. The minimum expected count is 4.57.

b. Computed only for a 2x2 table

**HYPERCHOL \* AF**

**Crosstab**

|           |                    |                    | AF     |        | Total  |
|-----------|--------------------|--------------------|--------|--------|--------|
|           |                    |                    | No     | Yes    |        |
| HYPERCHOL | No                 | Count              | 10     | 7      | 17     |
|           |                    | % within HYPERCHOL | 58.8%  | 41.2%  | 100.0% |
|           |                    | % within AF        | 12.7%  | 20.0%  | 14.9%  |
|           | Yes                | Count              | 69     | 28     | 97     |
|           |                    | % within HYPERCHOL | 71.1%  | 28.9%  | 100.0% |
|           |                    | % within AF        | 87.3%  | 80.0%  | 85.1%  |
| Total     | Count              | 79                 | 35     | 114    |        |
|           | % within HYPERCHOL | 69.3%              | 30.7%  | 100.0% |        |
|           | % within AF        | 100.0%             | 100.0% | 100.0% |        |

**Chi-Square Tests**

|                                    | Value              | df | Asymptotic Significance (2-sided) | Exact Sig. (2-sided) | Exact Sig. (1-sided) |
|------------------------------------|--------------------|----|-----------------------------------|----------------------|----------------------|
| Pearson Chi-Square                 | 1.030 <sup>a</sup> | 1  | .310                              | .393                 | .229                 |
| Continuity Correction <sup>b</sup> | .533               | 1  | .465                              |                      |                      |
| Likelihood Ratio                   | .988               | 1  | .320                              |                      |                      |
| Fisher's Exact Test                |                    |    |                                   |                      |                      |
| Linear-by-Linear Association       | 1.021              | 1  | .312                              |                      |                      |
| N of Valid Cases                   | 114                |    |                                   |                      |                      |

a. 0 cells (0.0%) have expected count less than 5. The minimum expected count is 5.22.

b. Computed only for a 2x2 table

**Smokergrp \* AF**

**Crosstab**

|           |                    |                    | AF     |        | Total  |
|-----------|--------------------|--------------------|--------|--------|--------|
|           |                    |                    | No     | Yes    |        |
| Smokergrp | No                 | Count              | 38     | 6      | 44     |
|           |                    | % within Smokergrp | 86.4%  | 13.6%  | 100.0% |
|           |                    | % within AF        | 48.1%  | 21.4%  | 41.1%  |
|           | Yes                | Count              | 41     | 22     | 63     |
|           |                    | % within Smokergrp | 65.1%  | 34.9%  | 100.0% |
|           |                    | % within AF        | 51.9%  | 78.6%  | 58.9%  |
| Total     | Count              | 79                 | 28     | 107    |        |
|           | % within Smokergrp | 73.8%              | 26.2%  | 100.0% |        |
|           | % within AF        | 100.0%             | 100.0% | 100.0% |        |



**Chi-Square Tests**

|                                    | Value              | df | Asymptotic Significance (2-sided) | Exact Sig. (2-sided) | Exact Sig. (1-sided) |
|------------------------------------|--------------------|----|-----------------------------------|----------------------|----------------------|
| Pearson Chi-Square                 | 6.074 <sup>a</sup> | 1  | .014                              | .015                 | .011                 |
| Continuity Correction <sup>b</sup> | 5.023              | 1  | .025                              |                      |                      |
| Likelihood Ratio                   | 6.442              | 1  | .011                              |                      |                      |
| Fisher's Exact Test                |                    |    |                                   |                      |                      |
| Linear-by-Linear Association       | 6.018              | 1  | .014                              |                      |                      |
| N of Valid Cases                   | 107                |    |                                   |                      |                      |

a. 0 cells (0.0%) have expected count less than 5. The minimum expected count is 11.51.

b. Computed only for a 2x2 table

**alcoholgrp \* AF**

**Crosstab**

|            |                     |                     | AF     |        | Total  |
|------------|---------------------|---------------------|--------|--------|--------|
|            |                     |                     | No     | Yes    |        |
| alcoholgrp | No                  | Count               | 70     | 23     | 93     |
|            |                     | % within alcoholgrp | 75.3%  | 24.7%  | 100.0% |
|            |                     | % within AF         | 95.9%  | 88.5%  | 93.9%  |
|            | Yes                 | Count               | 3      | 3      | 6      |
|            |                     | % within alcoholgrp | 50.0%  | 50.0%  | 100.0% |
|            |                     | % within AF         | 4.1%   | 11.5%  | 6.1%   |
| Total      | Count               | 73                  | 26     | 99     |        |
|            | % within alcoholgrp | 73.7%               | 26.3%  | 100.0% |        |
|            | % within AF         | 100.0%              | 100.0% | 100.0% |        |

**Chi-Square Tests**

|                                    | Value              | df | Asymptotic Significance (2-sided) | Exact Sig. (2-sided) | Exact Sig. (1-sided) |
|------------------------------------|--------------------|----|-----------------------------------|----------------------|----------------------|
| Pearson Chi-Square                 | 1.858 <sup>a</sup> | 1  | .173                              | .184                 | .184                 |
| Continuity Correction <sup>b</sup> | .783               | 1  | .376                              |                      |                      |
| Likelihood Ratio                   | 1.646              | 1  | .199                              |                      |                      |
| Fisher's Exact Test                |                    |    |                                   |                      |                      |
| Linear-by-Linear Association       | 1.840              | 1  | .175                              |                      |                      |
| N of Valid Cases                   | 99                 |    |                                   |                      |                      |

a. 2 cells (50.0%) have expected count less than 5. The minimum expected count is 1.58.

b. Computed only for a 2x2 table

FREQUENCIES VARIABLES=ISOLATED  
 /NTILES=4  
 /STATISTICS=STDDEV MEAN

## Frequencies

### Notes

|                        |                                   |                                                                                               |
|------------------------|-----------------------------------|-----------------------------------------------------------------------------------------------|
| Output Created         |                                   | 01-MAR-2021 14:44:40                                                                          |
| Comments               |                                   |                                                                                               |
| Input                  | Data                              | C:\Users\user\Downloads\ImAnisah<br>Statistic & SPSS\TOCO T3\Data<br>toco.sav                 |
|                        | Active Dataset                    | DataSet1                                                                                      |
|                        | Filter                            | <none>                                                                                        |
|                        | Weight                            | <none>                                                                                        |
|                        | Split File                        | <none>                                                                                        |
|                        | N of Rows in Working Data<br>File | 156                                                                                           |
| Missing Value Handling | Definition of Missing             | User-defined missing values are<br>treated as missing.                                        |
|                        | Cases Used                        | Statistics are based on all cases with<br>valid data.                                         |
| Syntax                 |                                   | FREQUENCIES<br>VARIABLES=ISOLATED<br>/NTILES=4<br>/STATISTICS=STDDEV MEAN<br>/ORDER=ANALYSIS. |
| Resources              | Processor Time                    | 00:00:00.00                                                                                   |
|                        | Elapsed Time                      | 00:00:00.01                                                                                   |

### Statistics

ISOLATED

|                |         |      |
|----------------|---------|------|
| N              | Valid   | 142  |
|                | Missing | 14   |
| Mean           |         | .92  |
| Std. Deviation |         | .279 |
| Percentiles    | 25      | 1.00 |
|                | 50      | 1.00 |
|                | 75      | 1.00 |

**ISOLATED**

|         |            | Frequency | Percent | Valid Percent | Cumulative Percent |
|---------|------------|-----------|---------|---------------|--------------------|
| Valid   | CABG+valve | 12        | 7.7     | 8.5           | 8.5                |
|         | CABG       | 130       | 83.3    | 91.5          | 100.0              |
|         | Total      | 142       | 91.0    | 100.0         |                    |
| Missing | 9          | 14        | 9.0     |               |                    |
| Total   |            | 156       | 100.0   |               |                    |

CROSSTABS

```

/TABLES=ISOLATED BY AF
/FORMAT=AVALUE TABLES
/STATISTICS=CHISQ
/CELLS=COUNT ROW COLUMN
/COUNT ROUND CELL.

```

**Crosstabs**

**Notes**

|                        |                                   |                                                                                                                                          |
|------------------------|-----------------------------------|------------------------------------------------------------------------------------------------------------------------------------------|
| Output Created         |                                   | 01-MAR-2021 14:45:55                                                                                                                     |
| Comments               |                                   |                                                                                                                                          |
| Input                  | Data                              | C:\Users\user\Downloads\ImAnisah<br>Statistic & SPSS\TOCO T3\Data<br>toco.sav                                                            |
|                        | Active Dataset                    | DataSet1                                                                                                                                 |
|                        | Filter                            | <none>                                                                                                                                   |
|                        | Weight                            | <none>                                                                                                                                   |
|                        | Split File                        | <none>                                                                                                                                   |
|                        | N of Rows in Working Data<br>File | 156                                                                                                                                      |
| Missing Value Handling | Definition of Missing             | User-defined missing values are<br>treated as missing.                                                                                   |
|                        | Cases Used                        | Statistics for each table are based<br>on all the cases with valid data in the<br>specified range(s) for all variables in<br>each table. |
| Syntax                 |                                   | CROSSTABS<br>/TABLES=ISOLATED BY AF<br>/FORMAT=AVALUE TABLES<br>/STATISTICS=CHISQ<br>/CELLS=COUNT ROW COLUMN<br>/COUNT ROUND CELL.       |
| Resources              | Processor Time                    | 00:00:00.03                                                                                                                              |
|                        | Elapsed Time                      | 00:00:00.04                                                                                                                              |
|                        | Dimensions Requested              | 2                                                                                                                                        |
|                        | Cells Available                   | 524245                                                                                                                                   |

**Case Processing Summary**

|               | Cases |         |         |         |       |         |
|---------------|-------|---------|---------|---------|-------|---------|
|               | Valid |         | Missing |         | Total |         |
|               | N     | Percent | N       | Percent | N     | Percent |
| ISOLATED * AF | 142   | 91.0%   | 14      | 9.0%    | 156   | 100.0%  |

**ISOLATED \* AF Crosstabulation**

|          |                   |                   | AF     |        | Total  |
|----------|-------------------|-------------------|--------|--------|--------|
|          |                   |                   | No     | Yes    |        |
| ISOLATED | CABG+valve        | Count             | 8      | 4      | 12     |
|          |                   | % within ISOLATED | 66.7%  | 33.3%  | 100.0% |
|          |                   | % within AF       | 7.7%   | 10.5%  | 8.5%   |
|          | CABG              | Count             | 96     | 34     | 130    |
|          |                   | % within ISOLATED | 73.8%  | 26.2%  | 100.0% |
|          |                   | % within AF       | 92.3%  | 89.5%  | 91.5%  |
| Total    | Count             | 104               | 38     | 142    |        |
|          | % within ISOLATED | 73.2%             | 26.8%  | 100.0% |        |
|          | % within AF       | 100.0%            | 100.0% | 100.0% |        |

**Chi-Square Tests**

|                                    | Value             | df | Asymptotic Significance (2-sided) | Exact Sig. (2-sided) | Exact Sig. (1-sided) |
|------------------------------------|-------------------|----|-----------------------------------|----------------------|----------------------|
| Pearson Chi-Square                 | .289 <sup>a</sup> | 1  | .591                              | .734                 | .405                 |
| Continuity Correction <sup>b</sup> | .039              | 1  | .844                              |                      |                      |
| Likelihood Ratio                   | .277              | 1  | .599                              |                      |                      |
| Fisher's Exact Test                |                   |    |                                   |                      |                      |
| Linear-by-Linear Association       | .287              | 1  | .592                              |                      |                      |
| N of Valid Cases                   | 142               |    |                                   |                      |                      |

a. 1 cells (25.0%) have expected count less than 5. The minimum expected count is 3.21.

b. Computed only for a 2x2 table

```
T-TEST GROUPS=AF(0 1)
/MISSING=ANALYSIS
/VARIABLES=XCLAMPTIME BYPASSTIME
/CRITERIA=CI(.95).
```

**T-Test**

**Notes**

|                        |                                                                                                         |                                                                                                                            |
|------------------------|---------------------------------------------------------------------------------------------------------|----------------------------------------------------------------------------------------------------------------------------|
| Output Created         | 01-MAR-2021 14:46:22                                                                                    |                                                                                                                            |
| Comments               |                                                                                                         |                                                                                                                            |
| Input                  | Data                                                                                                    | C:\Users\user\Downloads\ImAnisah Statistic & SPSS\TOCO T3\Data toco.sav                                                    |
|                        | Active Dataset                                                                                          | DataSet1                                                                                                                   |
|                        | Filter                                                                                                  | <none>                                                                                                                     |
|                        | Weight                                                                                                  | <none>                                                                                                                     |
|                        | Split File                                                                                              | <none>                                                                                                                     |
|                        | N of Rows in Working Data File                                                                          | 156                                                                                                                        |
| Missing Value Handling | Definition of Missing                                                                                   | User defined missing values are treated as missing.                                                                        |
|                        | Cases Used                                                                                              | Statistics for each analysis are based on the cases with no missing or out-of-range data for any variable in the analysis. |
| Syntax                 | T-TEST GROUPS=AF(0 1)<br>/MISSING=ANALYSIS<br>/VARIABLES=XCLAMPTIME<br>BYPASSTIME<br>/CRITERIA=CI(.95). |                                                                                                                            |
| Resources              | Processor Time                                                                                          | 00:00:00.02                                                                                                                |
|                        | Elapsed Time                                                                                            | 00:00:00.07                                                                                                                |

**Group Statistics**

|            | AF  | N  | Mean  | Std. Deviation | Std. Error Mean |
|------------|-----|----|-------|----------------|-----------------|
| XCLAMPTIME | No  | 38 | 70.95 | 36.027         | 5.844           |
|            | Yes | 21 | 73.19 | 31.020         | 6.769           |
| BYPASSTIME | No  | 20 | 96.75 | 57.230         | 12.797          |
|            | Yes | 21 | 94.33 | 38.506         | 8.403           |

**Independent Samples Test**

|            |                             | Levene's Test for Equality of Variances |      | t-test for Equality of Means |        |                 |                 |                       |                                           |        |
|------------|-----------------------------|-----------------------------------------|------|------------------------------|--------|-----------------|-----------------|-----------------------|-------------------------------------------|--------|
|            |                             | F                                       | Sig. | t                            | df     | Sig. (2-tailed) | Mean Difference | Std. Error Difference | 95% Confidence Interval of the Difference |        |
|            |                             |                                         |      |                              |        |                 |                 |                       | Lower                                     | Upper  |
| XCLAMPTIME | Equal variances assumed     | .011                                    | .916 | -.240                        | 57     | .811            | -2.243          | 9.341                 | -20.948                                   | 16.462 |
|            | Equal variances not assumed |                                         |      | -.251                        | 46.856 | .803            | -2.243          | 8.943                 | -20.236                                   | 15.749 |
| BYPASSTIME | Equal variances assumed     | .856                                    | .360 | .159                         | 39     | .874            | 2.417           | 15.165                | -28.258                                   | 33.092 |
|            | Equal variances not assumed |                                         |      | .158                         | 33.075 | .876            | 2.417           | 15.309                | -28.727                                   | 33.561 |

```

EXAMINE VARIABLES=BYPASSTIME XCLAMPTIME BY AF
/PLOT BOXPLOT STEMLEAF NPLOT
/COMPARE GROUPS
  
```

/STATISTICS DESCRIPTIVES  
 /CINTERVAL 95  
 /MISSING LISTWISE  
 /NOTOTAL.

## Explore

### Notes

|                        |                                                                                                                                                                                          |                                                                                                       |
|------------------------|------------------------------------------------------------------------------------------------------------------------------------------------------------------------------------------|-------------------------------------------------------------------------------------------------------|
| Output Created         | 01-MAR-2021 14:47:14                                                                                                                                                                     |                                                                                                       |
| Comments               |                                                                                                                                                                                          |                                                                                                       |
| Input                  | Data                                                                                                                                                                                     | C:\Users\user\Downloads\ImAnisah<br>Statistic & SPSS\TOCO T3\Data<br>toco.sav                         |
|                        | Active Dataset                                                                                                                                                                           | DataSet1                                                                                              |
|                        | Filter                                                                                                                                                                                   | <none>                                                                                                |
|                        | Weight                                                                                                                                                                                   | <none>                                                                                                |
|                        | Split File                                                                                                                                                                               | <none>                                                                                                |
|                        | N of Rows in Working Data<br>File                                                                                                                                                        | 156                                                                                                   |
| Missing Value Handling | Definition of Missing                                                                                                                                                                    | User-defined missing values for<br>dependent variables are treated as<br>missing.                     |
|                        | Cases Used                                                                                                                                                                               | Statistics are based on cases with<br>no missing values for any dependent<br>variable or factor used. |
| Syntax                 | EXAMINE<br>VARIABLES=BYPASSTIME<br>XCLAMPTIME BY AF<br>/PLOT BOXPLOT STEMLEAF<br>NPLOT<br>/COMPARE GROUPS<br>/STATISTICS DESCRIPTIVES<br>/CINTERVAL 95<br>/MISSING LISTWISE<br>/NOTOTAL. |                                                                                                       |
| Resources              | Processor Time                                                                                                                                                                           | 00:00:03.64                                                                                           |
|                        | Elapsed Time                                                                                                                                                                             | 00:00:03.70                                                                                           |

## AF

### Case Processing Summary

|            |     | Cases |         |         |         |       |         |
|------------|-----|-------|---------|---------|---------|-------|---------|
|            |     | Valid |         | Missing |         | Total |         |
|            |     | N     | Percent | N       | Percent | N     | Percent |
| BYPASSTIME | No  | 16    | 13.6%   | 102     | 86.4%   | 118   | 100.0%  |
|            | Yes | 18    | 47.4%   | 20      | 52.6%   | 38    | 100.0%  |
| XCLAMPTIME | No  | 16    | 13.6%   | 102     | 86.4%   | 118   | 100.0%  |
|            | Yes | 18    | 47.4%   | 20      | 52.6%   | 38    | 100.0%  |

**Descriptives**

| AF                  |       |                                  | Statistic   | Std. Error |  |
|---------------------|-------|----------------------------------|-------------|------------|--|
| BYPASSTIME          | No    | Mean                             | 98.56       | 15.664     |  |
|                     |       | 95% Confidence Interval for Mean | Lower Bound | 65.18      |  |
|                     |       |                                  | Upper Bound | 131.95     |  |
|                     |       | 5% Trimmed Mean                  | 89.85       |            |  |
|                     |       | Median                           | 78.50       |            |  |
|                     |       | Variance                         | 3925.729    |            |  |
|                     |       | Std. Deviation                   | 62.656      |            |  |
|                     |       | Minimum                          | 50          |            |  |
|                     |       | Maximum                          | 304         |            |  |
|                     |       | Range                            | 254         |            |  |
|                     |       | Interquartile Range              | 65          |            |  |
|                     |       | Skewness                         | 2.572       | .564       |  |
|                     |       | Kurtosis                         | 7.980       | 1.091      |  |
|                     | Yes   | Mean                             | 95.56       | 9.615      |  |
|                     |       | 95% Confidence Interval for Mean | Lower Bound | 75.27      |  |
|                     |       |                                  | Upper Bound | 115.84     |  |
|                     |       | 5% Trimmed Mean                  | 91.40       |            |  |
|                     |       | Median                           | 90.50       |            |  |
|                     |       | Variance                         | 1664.144    |            |  |
|                     |       | Std. Deviation                   | 40.794      |            |  |
|                     |       | Minimum                          | 50          |            |  |
|                     |       | Maximum                          | 216         |            |  |
|                     |       | Range                            | 166         |            |  |
| Interquartile Range | 52    |                                  |             |            |  |
| Skewness            | 1.483 | .536                             |             |            |  |
| Kurtosis            | 3.349 | 1.038                            |             |            |  |
| XCLAMPTIME          | No    | Mean                             | 73.56       | 12.478     |  |
|                     |       | 95% Confidence Interval for Mean | Lower Bound | 46.97      |  |
|                     |       |                                  | Upper Bound | 100.16     |  |
|                     |       | 5% Trimmed Mean                  | 66.12       |            |  |
|                     |       | Median                           | 56.00       |            |  |
|                     |       | Variance                         | 2491.063    |            |  |
|                     |       | Std. Deviation                   | 49.911      |            |  |
|                     |       | Minimum                          | 37          |            |  |
|                     |       | Maximum                          | 244         |            |  |
|                     |       | Range                            | 207         |            |  |
|                     |       | Interquartile Range              | 43          |            |  |
|                     |       | Skewness                         | 2.932       | .564       |  |
|                     |       | Kurtosis                         | 9.959       | 1.091      |  |
|                     | Yes   | Mean                             | 70.33       | 7.647      |  |
|                     |       | 95% Confidence Interval for Mean | Lower Bound | 54.20      |  |
|                     |       |                                  | Upper Bound | 86.47      |  |
|                     |       | 5% Trimmed Mean                  | 67.59       |            |  |

### Descriptives

| AF |                     | Statistic | Std. Error |
|----|---------------------|-----------|------------|
|    | Median              | 64.50     |            |
|    | Variance            | 1052.706  |            |
|    | Std. Deviation      | 32.445    |            |
|    | Minimum             | 22        |            |
|    | Maximum             | 168       |            |
|    | Range               | 146       |            |
|    | Interquartile Range | 37        |            |
|    | Skewness            | 1.522     | .536       |
|    | Kurtosis            | 3.994     | 1.038      |

### Tests of Normality

| AF         |     | Kolmogorov-Smirnov <sup>a</sup> |    |                   | Shapiro-Wilk |    |      |
|------------|-----|---------------------------------|----|-------------------|--------------|----|------|
|            |     | Statistic                       | df | Sig.              | Statistic    | df | Sig. |
| BYPASSTIME | No  | .219                            | 16 | .039              | .705         | 16 | .000 |
|            | Yes | .132                            | 18 | .200 <sup>*</sup> | .872         | 18 | .020 |
| XCLAMPTIME | No  | .246                            | 16 | .011              | .650         | 16 | .000 |
|            | Yes | .161                            | 18 | .200 <sup>*</sup> | .880         | 18 | .026 |

\*. This is a lower bound of the true significance.

a. Lilliefors Significance Correction

## BYPASSTIME

### Stem-and-Leaf Plots

BYPASSTIME Stem-and-Leaf Plot for

AF= No

| Frequency | Stem & | Leaf |
|-----------|--------|------|
| 2.00      | 5 .    | 00   |
| 2.00      | 5 .    | 79   |
| 1.00      | 6 .    | 1    |
| 2.00      | 6 .    | 57   |
| 1.00      | 7 .    | 1    |
| .00       | 7 .    |      |
| .00       | 8 .    |      |
| 2.00      | 8 .    | 66   |
| .00       | 9 .    |      |
| .00       | 9 .    |      |
| .00       | 10 .   |      |
| .00       | 10 .   |      |
| 2.00      | 11 .   | 00   |



|      |          |         |
|------|----------|---------|
| .00  | 11       | .       |
| .00  | 12       | .       |
| 1.00 | 12       | . 9     |
| 1.00 | 13       | . 0     |
| .00  | 13       | .       |
| 1.00 | 14       | . 2     |
| 1.00 | Extremes | (>=304) |

Stem width: 10  
Each leaf: 1 case(s)

BYPASSTIME Stem-and-Leaf Plot for  
AF= Yes

| Frequency | Stem &   | Leaf    |
|-----------|----------|---------|
| 4.00      | 5        | . 0259  |
| 2.00      | 6        | . 28    |
| 1.00      | 7        | . 5     |
| 2.00      | 8        | . 07    |
| 1.00      | 9        | . 4     |
| 3.00      | 10       | . 889   |
| 2.00      | 11       | . 28    |
| 1.00      | 12       | . 8     |
| 1.00      | 13       | . 9     |
| 1.00      | Extremes | (>=216) |

Stem width: 10  
Each leaf: 1 case(s)

## Normal Q-Q Plots

### Normal Q-Q Plot of BYPASSTIME

for AF= No

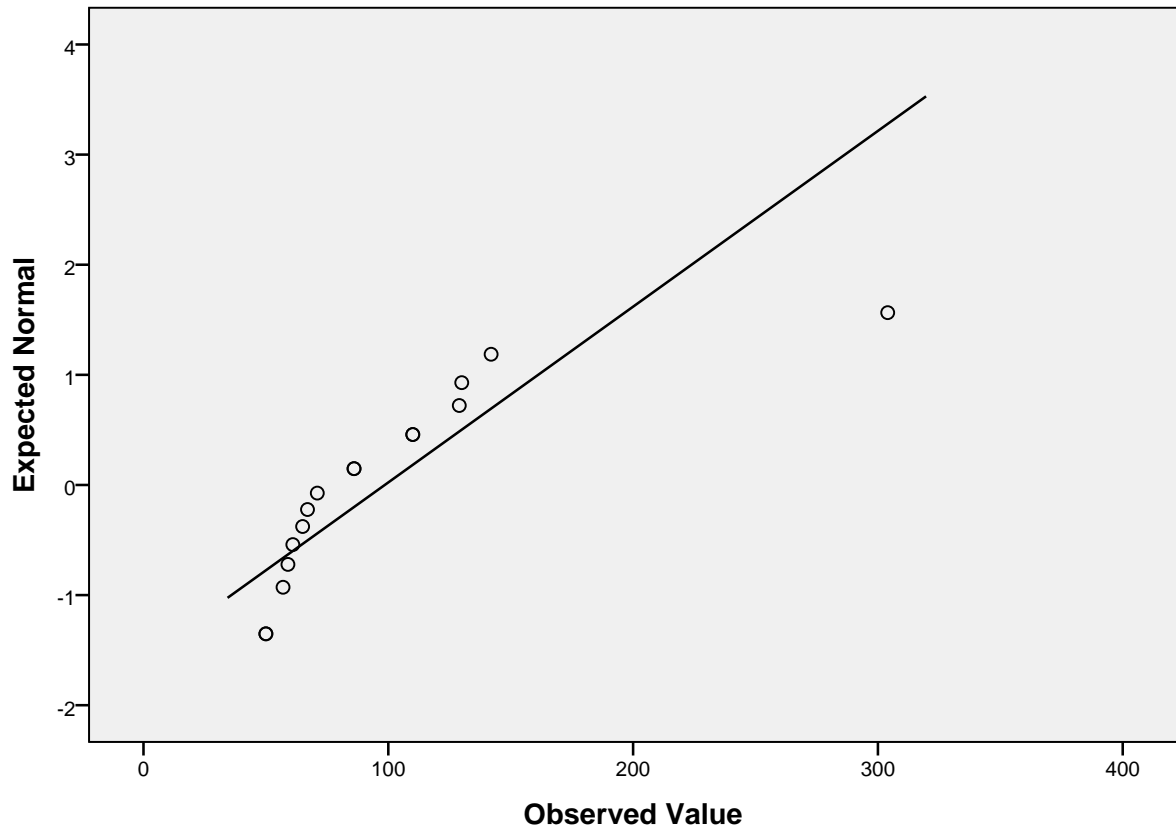

### Normal Q-Q Plot of BYPASSTIME

for AF= Yes

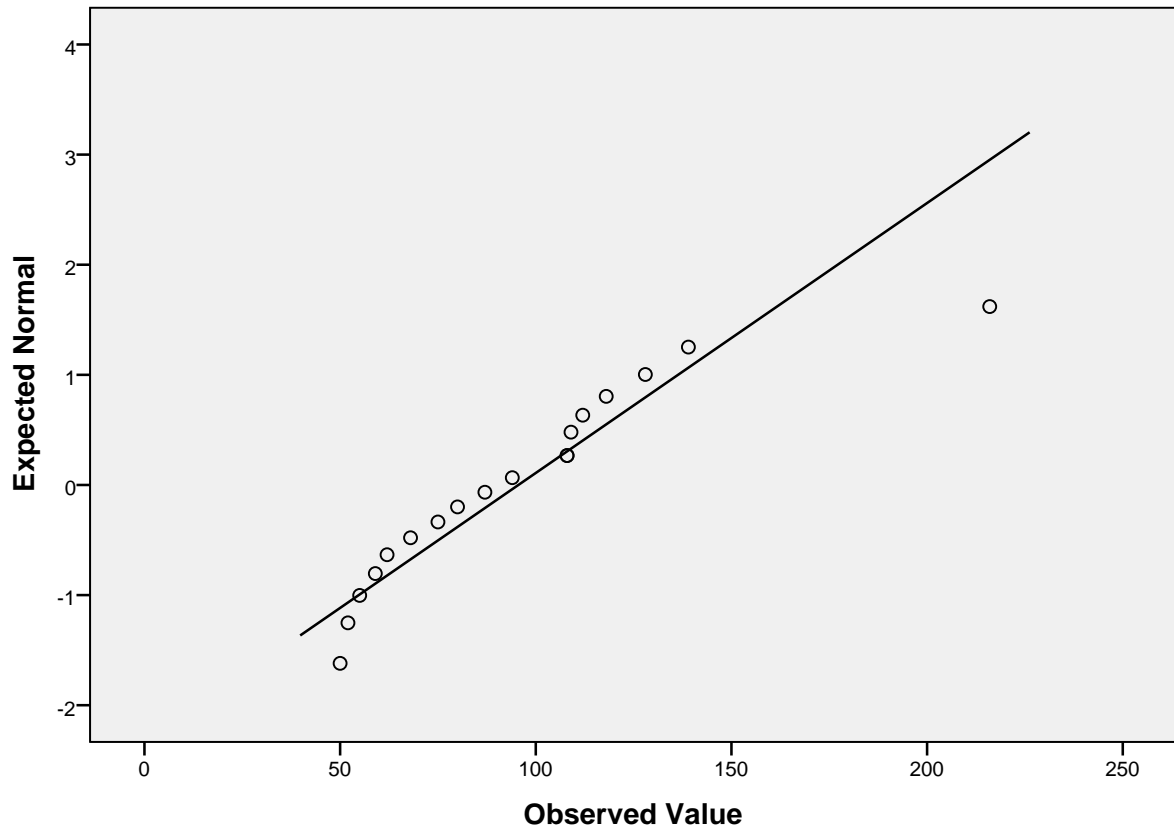

### Detrended Normal Q-Q Plots

### Detrended Normal Q-Q Plot of BYPASSTIME

for AF= No

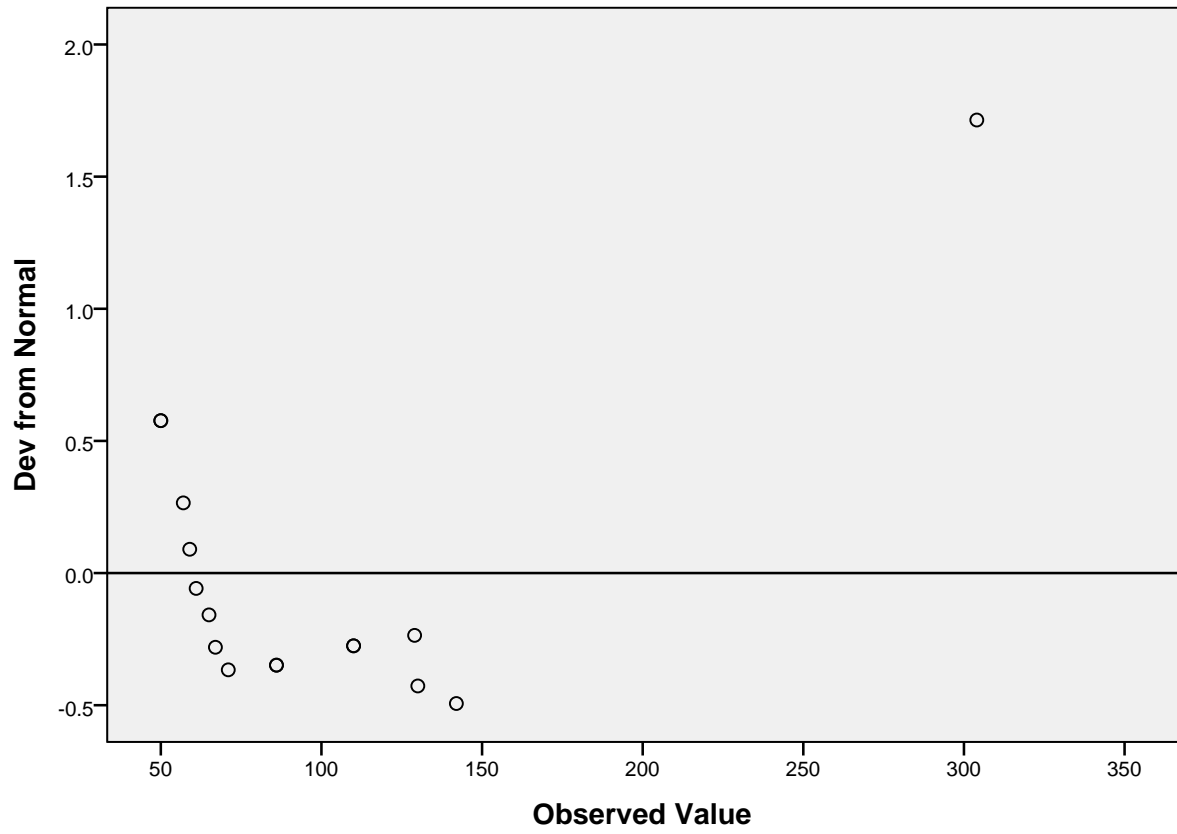

### Detrended Normal Q-Q Plot of BYPASSTIME

for AF= Yes

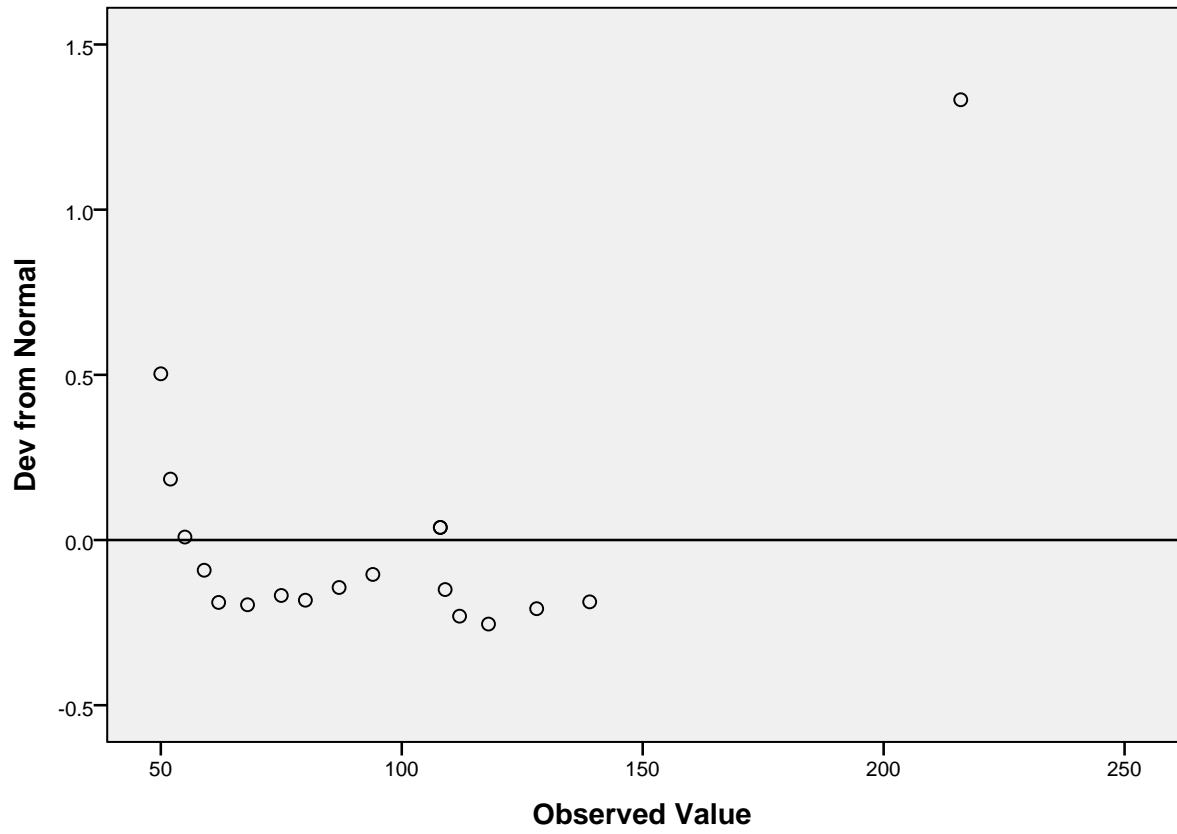

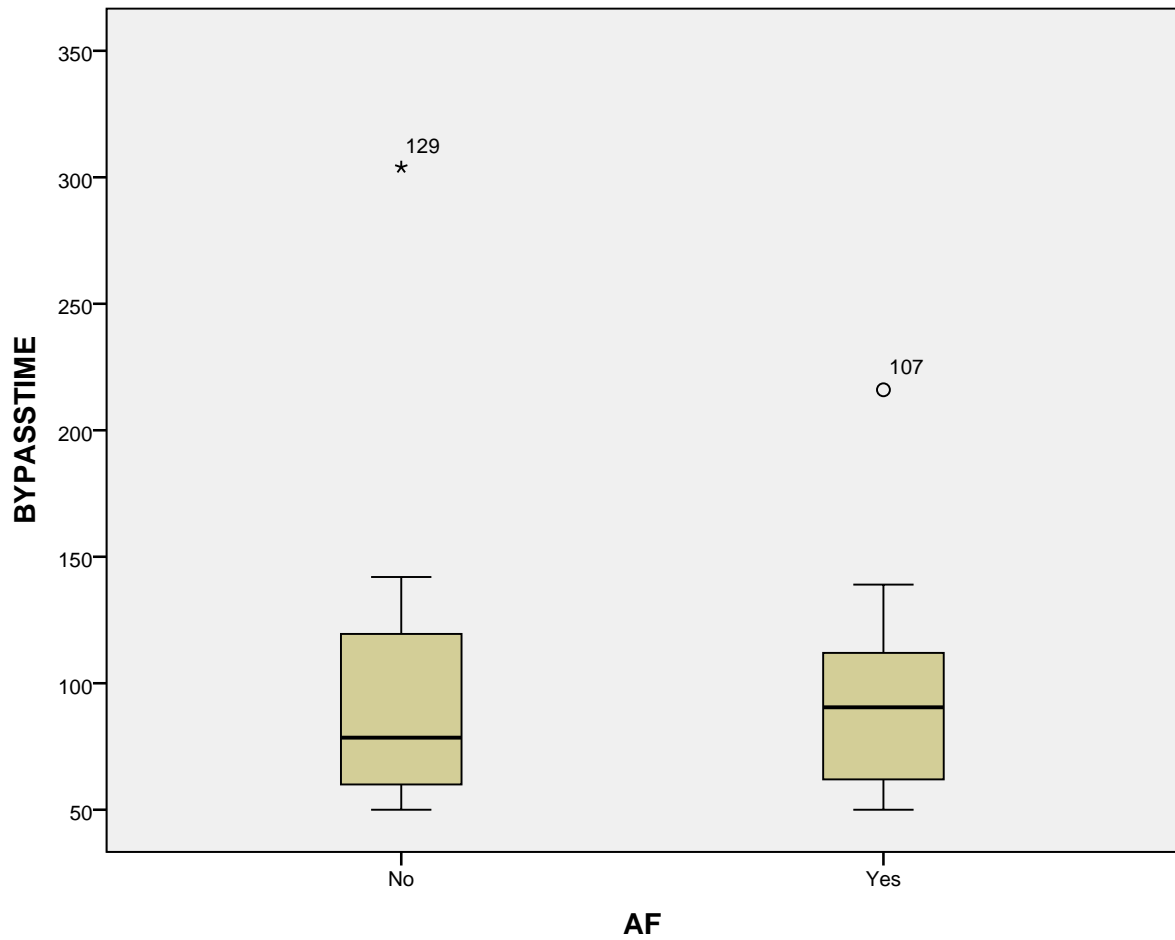

## XCLAMPTIME

### Stem-and-Leaf Plots

XCLAMPTIME Stem-and-Leaf Plot for  
AF= No

| Frequency | Stem & | Leaf |
|-----------|--------|------|
| 2.00      | 3 .    | 78   |
| 2.00      | 4 .    | 12   |
| .00       | 4 .    |      |
| 3.00      | 5 .    | 014  |
| 2.00      | 5 .    | 57   |
| .00       | 6 .    |      |
| 1.00      | 6 .    | 5    |
| .00       | 7 .    |      |
| 1.00      | 7 .    | 9    |
| 1.00      | 8 .    | 1    |
| 1.00      | 8 .    | 9    |
| 1.00      | 9 .    | 0    |

```

      .00      9 .
     1.00     10 . 4
     1.00 Extremes    (>=244)

```

```

Stem width:      10
Each leaf:      1 case(s)

```

XCLAMPTIME Stem-and-Leaf Plot for  
AF= Yes

```

Frequency      Stem & Leaf

      1.00      2 . 2
       .00      3 .
      4.00      4 . 0267
      2.00      5 . 12
      3.00      6 . 345
      1.00      7 . 7
      4.00      8 . 3335
      1.00      9 . 0
      1.00     10 . 5
      1.00 Extremes    (>=168)

```

```

Stem width:      10
Each leaf:      1 case(s)

```

## Normal Q-Q Plots

### Normal Q-Q Plot of XCLAMPTIME

for AF= No

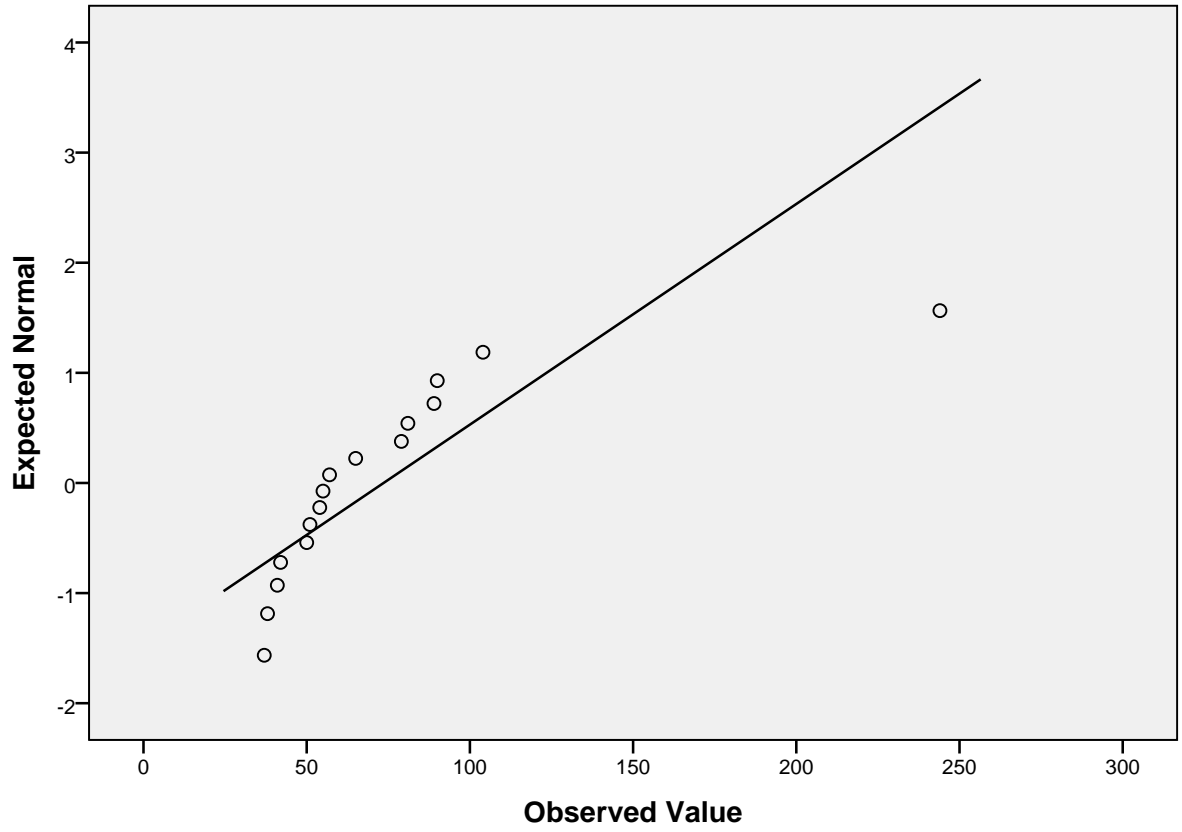



### Normal Q-Q Plot of XCLAMPTIME

for AF= Yes

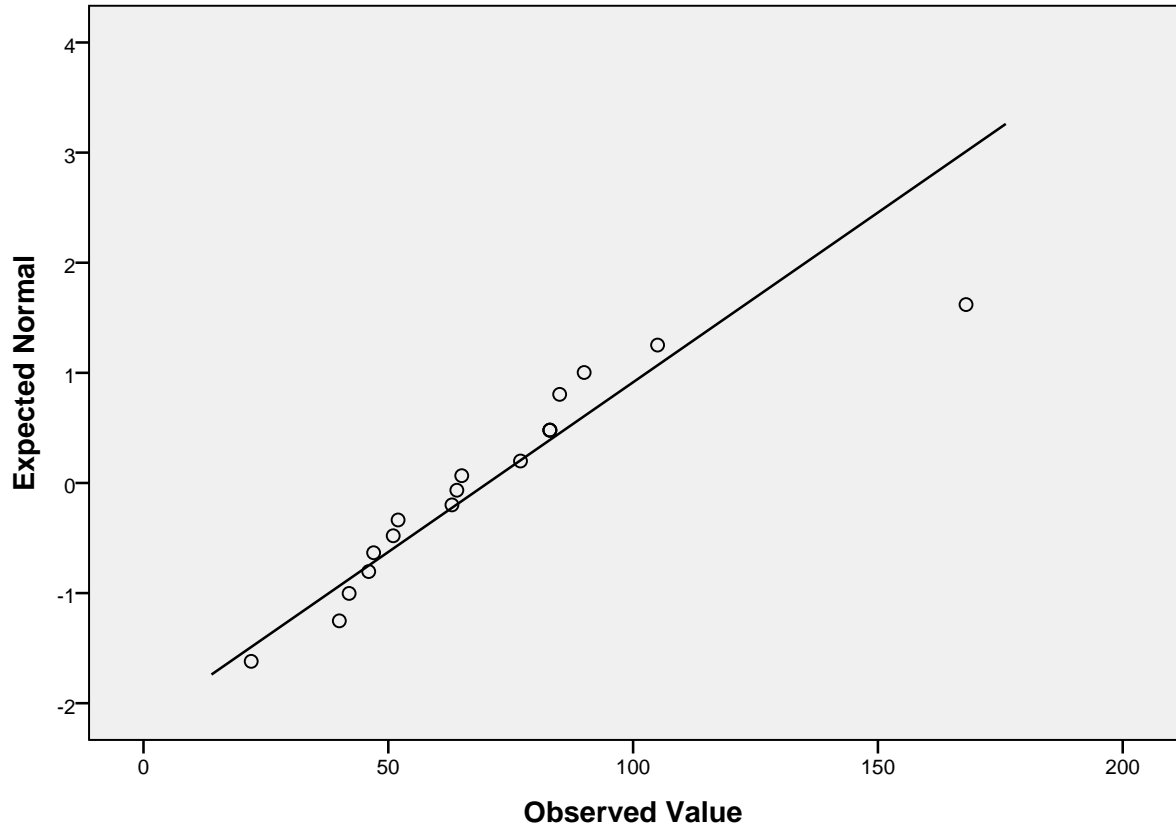

### Detrended Normal Q-Q Plots

**Detrended Normal Q-Q Plot of XCLAMPTIME**

for AF= No

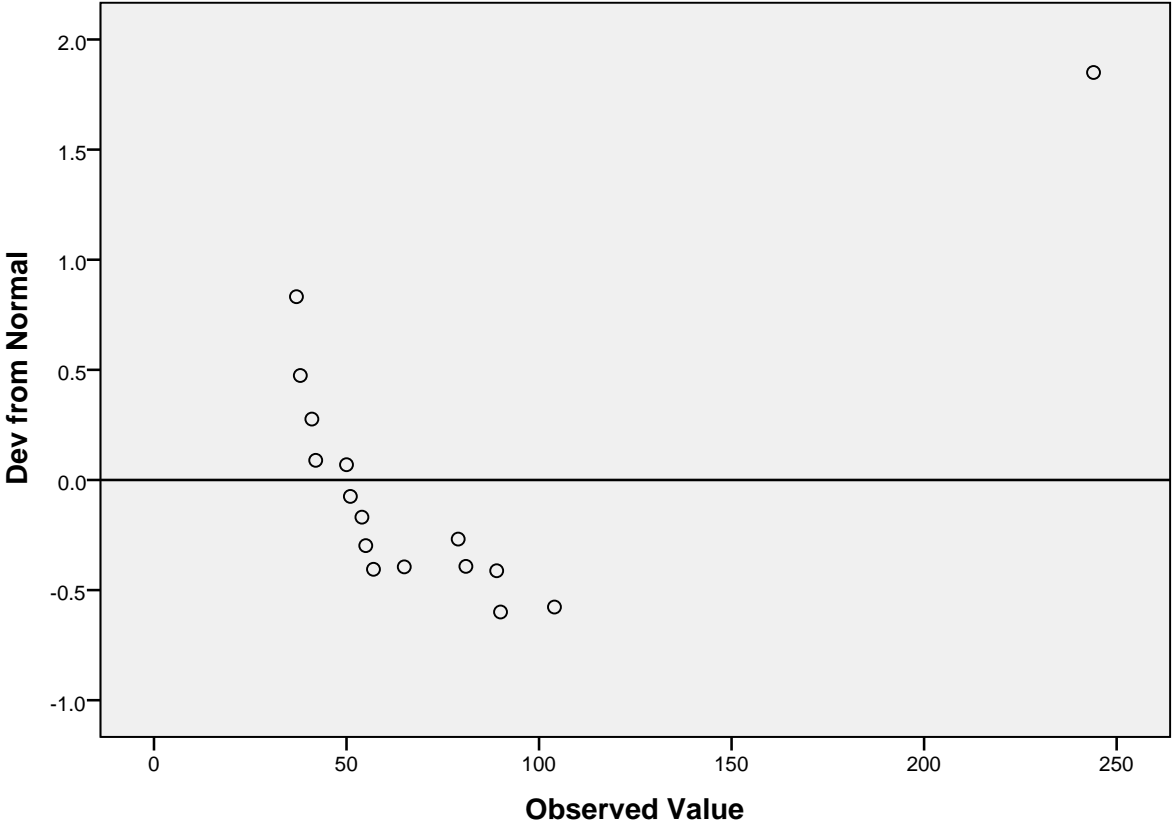

**Detrended Normal Q-Q Plot of XCLAMPTIME**

for AF= Yes

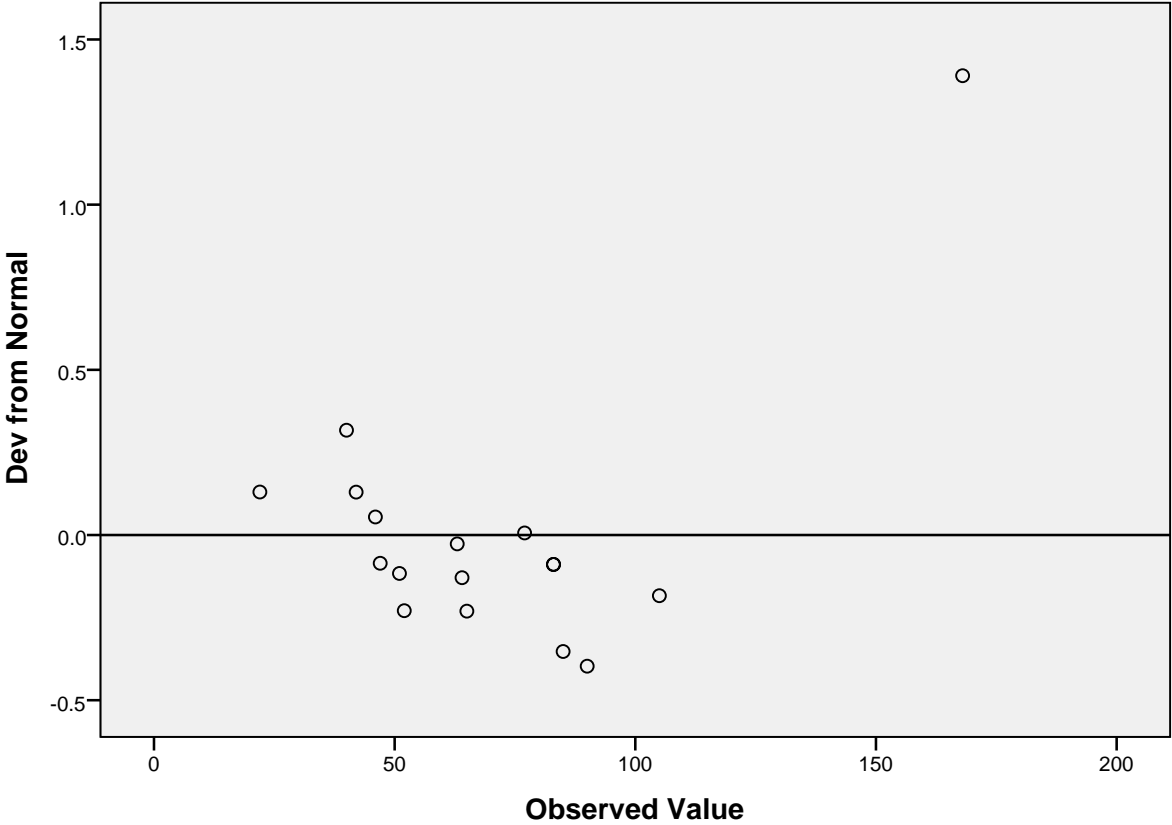

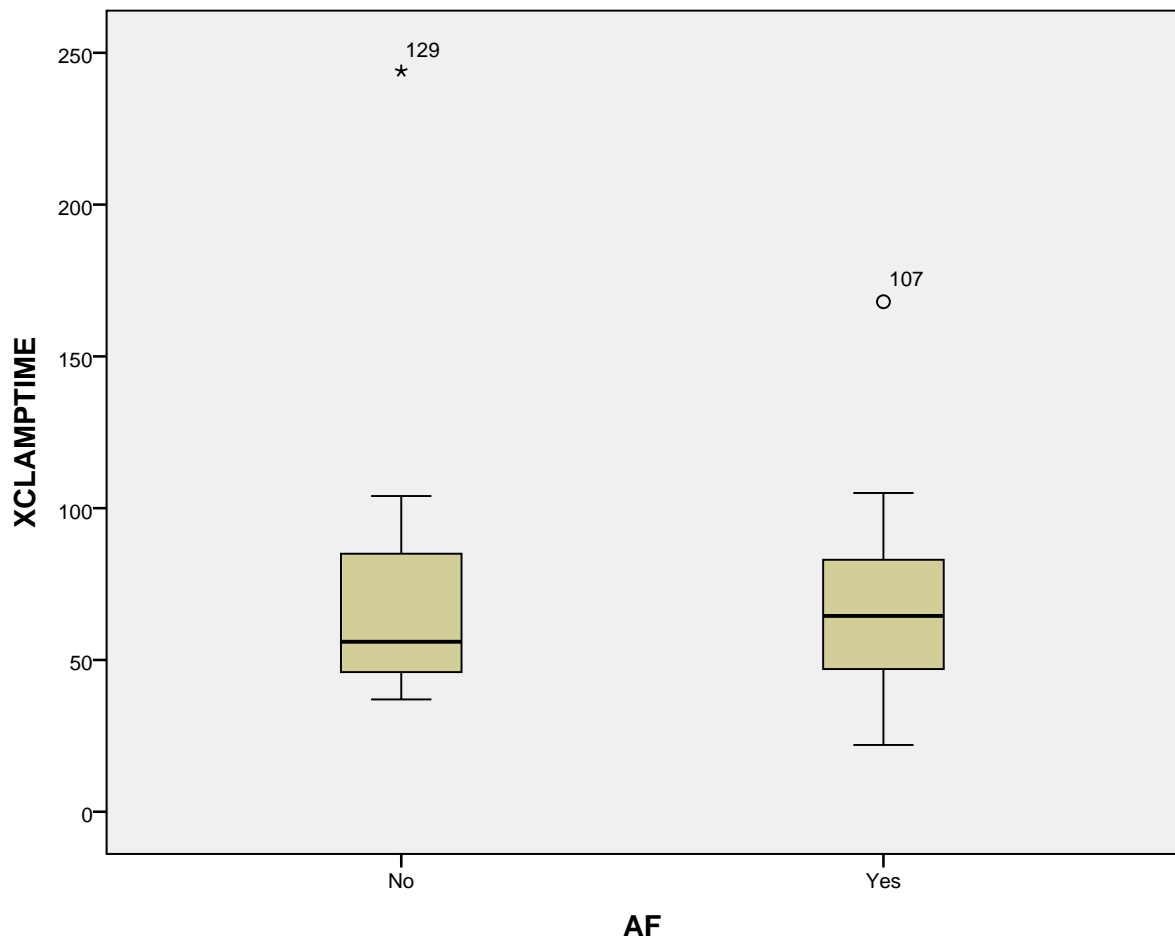

CROSSTABS

/TABLES=Stroke Sternalinfect Respiratory Renalfailure Endocrine Pleuralef  
fusion Tamponade Fever

Hyperkal others Death BY AF

/FORMAT=AVALUE TABLES

/STATISTICS=CHISQ

/CELLS=COUNT ROW COLUMN

/COUNT ROUND CELL.

## Crosstabs

**Notes**

|                        |                                |                                                                                                                                                                                                                                         |
|------------------------|--------------------------------|-----------------------------------------------------------------------------------------------------------------------------------------------------------------------------------------------------------------------------------------|
| Output Created         |                                | 01-MAR-2021 14:48:58                                                                                                                                                                                                                    |
| Comments               |                                |                                                                                                                                                                                                                                         |
| Input                  | Data                           | C:\Users\user\Downloads\ImAnisah Statistic & SPSS\TOCO T3\Data toco.sav                                                                                                                                                                 |
|                        | Active Dataset                 | DataSet1                                                                                                                                                                                                                                |
|                        | Filter                         | <none>                                                                                                                                                                                                                                  |
|                        | Weight                         | <none>                                                                                                                                                                                                                                  |
|                        | Split File                     | <none>                                                                                                                                                                                                                                  |
|                        | N of Rows in Working Data File | 156                                                                                                                                                                                                                                     |
| Missing Value Handling | Definition of Missing          | User-defined missing values are treated as missing.                                                                                                                                                                                     |
|                        | Cases Used                     | Statistics for each table are based on all the cases with valid data in the specified range(s) for all variables in each table.                                                                                                         |
| Syntax                 |                                | CROSSTABS<br>/TABLES=Stroke Sternalinfect Respiratory Renalfailure Endocrine PleuralEffusion Tamponade Fever Hyperkal others Death BY AF<br>/FORMAT=AVALUE TABLES<br>/STATISTICS=CHISQ<br>/CELLS=COUNT ROW COLUMN<br>/COUNT ROUND CELL. |
| Resources              | Processor Time                 | 00:00:00.08                                                                                                                                                                                                                             |
|                        | Elapsed Time                   | 00:00:00.12                                                                                                                                                                                                                             |
|                        | Dimensions Requested           | 2                                                                                                                                                                                                                                       |
|                        | Cells Available                | 524245                                                                                                                                                                                                                                  |

**Case Processing Summary**

|                      | Cases |         |         |         |       |         |
|----------------------|-------|---------|---------|---------|-------|---------|
|                      | Valid |         | Missing |         | Total |         |
|                      | N     | Percent | N       | Percent | N     | Percent |
| Stroke * AF          | 101   | 64.7%   | 55      | 35.3%   | 156   | 100.0%  |
| Sternalinfect * AF   | 101   | 64.7%   | 55      | 35.3%   | 156   | 100.0%  |
| Respiratory * AF     | 101   | 64.7%   | 55      | 35.3%   | 156   | 100.0%  |
| Renalfailure * AF    | 101   | 64.7%   | 55      | 35.3%   | 156   | 100.0%  |
| Endocrine * AF       | 101   | 64.7%   | 55      | 35.3%   | 156   | 100.0%  |
| PleuralEffusion * AF | 101   | 64.7%   | 55      | 35.3%   | 156   | 100.0%  |
| Tamponade * AF       | 101   | 64.7%   | 55      | 35.3%   | 156   | 100.0%  |
| Fever * AF           | 101   | 64.7%   | 55      | 35.3%   | 156   | 100.0%  |
| Hyperkal * AF        | 101   | 64.7%   | 55      | 35.3%   | 156   | 100.0%  |
| others * AF          | 101   | 64.7%   | 55      | 35.3%   | 156   | 100.0%  |
| Death * AF           | 101   | 64.7%   | 55      | 35.3%   | 156   | 100.0%  |

## Stroke \* AF

Crosstab

|        |                 |                 | AF     |        | Total  |
|--------|-----------------|-----------------|--------|--------|--------|
|        |                 |                 | No     | Yes    |        |
| Stroke | No              | Count           | 69     | 28     | 97     |
|        |                 | % within Stroke | 71.1%  | 28.9%  | 100.0% |
|        |                 | % within AF     | 97.2%  | 93.3%  | 96.0%  |
|        | Yes             | Count           | 2      | 2      | 4      |
|        |                 | % within Stroke | 50.0%  | 50.0%  | 100.0% |
|        |                 | % within AF     | 2.8%   | 6.7%   | 4.0%   |
| Total  | Count           | 71              | 30     | 101    |        |
|        | % within Stroke | 70.3%           | 29.7%  | 100.0% |        |
|        | % within AF     | 100.0%          | 100.0% | 100.0% |        |

Chi-Square Tests

|                                    | Value             | df | Asymptotic<br>Significance (2-<br>sided) | Exact Sig. (2-<br>sided) | Exact Sig. (1-<br>sided) |
|------------------------------------|-------------------|----|------------------------------------------|--------------------------|--------------------------|
| Pearson Chi-Square                 | .822 <sup>a</sup> | 1  | .365                                     | .580                     | .342                     |
| Continuity Correction <sup>b</sup> | .121              | 1  | .728                                     |                          |                          |
| Likelihood Ratio                   | .753              | 1  | .386                                     |                          |                          |
| Fisher's Exact Test                |                   |    |                                          |                          |                          |
| Linear-by-Linear<br>Association    | .814              | 1  | .367                                     |                          |                          |
| N of Valid Cases                   | 101               |    |                                          |                          |                          |

a. 2 cells (50.0%) have expected count less than 5. The minimum expected count is 1.19.

b. Computed only for a 2x2 table

## Sternalinfect \* AF

Crosstab

|               |                        |                        | AF     |        | Total  |
|---------------|------------------------|------------------------|--------|--------|--------|
|               |                        |                        | No     | Yes    |        |
| Sternalinfect | No                     | Count                  | 68     | 30     | 98     |
|               |                        | % within Sternalinfect | 69.4%  | 30.6%  | 100.0% |
|               |                        | % within AF            | 95.8%  | 100.0% | 97.0%  |
|               | Yes                    | Count                  | 3      | 0      | 3      |
|               |                        | % within Sternalinfect | 100.0% | 0.0%   | 100.0% |
|               |                        | % within AF            | 4.2%   | 0.0%   | 3.0%   |
| Total         | Count                  | 71                     | 30     | 101    |        |
|               | % within Sternalinfect | 70.3%                  | 29.7%  | 100.0% |        |
|               | % within AF            | 100.0%                 | 100.0% | 100.0% |        |

**Chi-Square Tests**

|                                    | Value              | df | Asymptotic Significance (2-sided) | Exact Sig. (2-sided) | Exact Sig. (1-sided) |
|------------------------------------|--------------------|----|-----------------------------------|----------------------|----------------------|
| Pearson Chi-Square                 | 1.306 <sup>a</sup> | 1  | .253                              | .553                 | .343                 |
| Continuity Correction <sup>b</sup> | .252               | 1  | .616                              |                      |                      |
| Likelihood Ratio                   | 2.153              | 1  | .142                              |                      |                      |
| Fisher's Exact Test                |                    |    |                                   |                      |                      |
| Linear-by-Linear Association       | 1.293              | 1  | .255                              |                      |                      |
| N of Valid Cases                   | 101                |    |                                   |                      |                      |

a. 2 cells (50.0%) have expected count less than 5. The minimum expected count is .89.

b. Computed only for a 2x2 table

**Respiratory \* AF**

**Crosstab**

|             |                      |                      | AF     |        | Total  |
|-------------|----------------------|----------------------|--------|--------|--------|
|             |                      |                      | No     | Yes    |        |
| Respiratory | No                   | Count                | 68     | 27     | 95     |
|             |                      | % within Respiratory | 71.6%  | 28.4%  | 100.0% |
|             |                      | % within AF          | 95.8%  | 90.0%  | 94.1%  |
|             | Yes                  | Count                | 3      | 3      | 6      |
|             |                      | % within Respiratory | 50.0%  | 50.0%  | 100.0% |
|             |                      | % within AF          | 4.2%   | 10.0%  | 5.9%   |
| Total       | Count                | 71                   | 30     | 101    |        |
|             | % within Respiratory | 70.3%                | 29.7%  | 100.0% |        |
|             | % within AF          | 100.0%               | 100.0% | 100.0% |        |

**Chi-Square Tests**

|                                    | Value              | df | Asymptotic Significance (2-sided) | Exact Sig. (2-sided) | Exact Sig. (1-sided) |
|------------------------------------|--------------------|----|-----------------------------------|----------------------|----------------------|
| Pearson Chi-Square                 | 1.259 <sup>a</sup> | 1  | .262                              | .358                 | .245                 |
| Continuity Correction <sup>b</sup> | .437               | 1  | .508                              |                      |                      |
| Likelihood Ratio                   | 1.156              | 1  | .282                              |                      |                      |
| Fisher's Exact Test                |                    |    |                                   |                      |                      |
| Linear-by-Linear Association       | 1.246              | 1  | .264                              |                      |                      |
| N of Valid Cases                   | 101                |    |                                   |                      |                      |

a. 2 cells (50.0%) have expected count less than 5. The minimum expected count is 1.78.

b. Computed only for a 2x2 table

**Renalfailure \* AF**

**Crosstab**

|              |                       |                       | AF     |        | Total  |
|--------------|-----------------------|-----------------------|--------|--------|--------|
|              |                       |                       | No     | Yes    |        |
| Renalfailure | No                    | Count                 | 67     | 29     | 96     |
|              |                       | % within Renalfailure | 69.8%  | 30.2%  | 100.0% |
|              |                       | % within AF           | 94.4%  | 96.7%  | 95.0%  |
|              | Yes                   | Count                 | 4      | 1      | 5      |
|              |                       | % within Renalfailure | 80.0%  | 20.0%  | 100.0% |
|              |                       | % within AF           | 5.6%   | 3.3%   | 5.0%   |
| Total        | Count                 | 71                    | 30     | 101    |        |
|              | % within Renalfailure | 70.3%                 | 29.7%  | 100.0% |        |
|              | % within AF           | 100.0%                | 100.0% | 100.0% |        |

**Chi-Square Tests**

|                                    | Value             | df | Asymptotic Significance (2-sided) | Exact Sig. (2-sided) | Exact Sig. (1-sided) |
|------------------------------------|-------------------|----|-----------------------------------|----------------------|----------------------|
| Pearson Chi-Square                 | .237 <sup>a</sup> | 1  | .626                              | 1.000                | .532                 |
| Continuity Correction <sup>b</sup> | .000              | 1  | 1.000                             |                      |                      |
| Likelihood Ratio                   | .255              | 1  | .614                              |                      |                      |
| Fisher's Exact Test                |                   |    |                                   |                      |                      |
| Linear-by-Linear Association       | .235              | 1  | .628                              |                      |                      |
| N of Valid Cases                   | 101               |    |                                   |                      |                      |

a. 2 cells (50.0%) have expected count less than 5. The minimum expected count is 1.49.

b. Computed only for a 2x2 table

**Endocrine \* AF**

**Crosstab**

|           |                    |                    | AF     |        | Total  |
|-----------|--------------------|--------------------|--------|--------|--------|
|           |                    |                    | No     | Yes    |        |
| Endocrine | No                 | Count              | 70     | 30     | 100    |
|           |                    | % within Endocrine | 70.0%  | 30.0%  | 100.0% |
|           |                    | % within AF        | 98.6%  | 100.0% | 99.0%  |
|           | Yes                | Count              | 1      | 0      | 1      |
|           |                    | % within Endocrine | 100.0% | 0.0%   | 100.0% |
|           |                    | % within AF        | 1.4%   | 0.0%   | 1.0%   |
| Total     | Count              | 71                 | 30     | 101    |        |
|           | % within Endocrine | 70.3%              | 29.7%  | 100.0% |        |
|           | % within AF        | 100.0%             | 100.0% | 100.0% |        |



**Chi-Square Tests**

|                                    | Value             | df | Asymptotic Significance (2-sided) | Exact Sig. (2-sided) | Exact Sig. (1-sided) |
|------------------------------------|-------------------|----|-----------------------------------|----------------------|----------------------|
| Pearson Chi-Square                 | .427 <sup>a</sup> | 1  | .514                              | 1.000                | .703                 |
| Continuity Correction <sup>b</sup> | .000              | 1  | 1.000                             |                      |                      |
| Likelihood Ratio                   | .709              | 1  | .400                              |                      |                      |
| Fisher's Exact Test                |                   |    |                                   |                      |                      |
| Linear-by-Linear Association       | .423              | 1  | .516                              |                      |                      |
| N of Valid Cases                   | 101               |    |                                   |                      |                      |

a. 2 cells (50.0%) have expected count less than 5. The minimum expected count is .30.

b. Computed only for a 2x2 table

**PleuralEffusion \* AF**

**Crosstab**

|                 |                          |                          | AF     |        | Total  |
|-----------------|--------------------------|--------------------------|--------|--------|--------|
|                 |                          |                          | No     | Yes    |        |
| PleuralEffusion | No                       | Count                    | 68     | 28     | 96     |
|                 |                          | % within PleuralEffusion | 70.8%  | 29.2%  | 100.0% |
|                 |                          | % within AF              | 95.8%  | 93.3%  | 95.0%  |
|                 | Yes                      | Count                    | 3      | 2      | 5      |
|                 |                          | % within PleuralEffusion | 60.0%  | 40.0%  | 100.0% |
|                 |                          | % within AF              | 4.2%   | 6.7%   | 5.0%   |
| Total           | Count                    | 71                       | 30     | 101    |        |
|                 | % within PleuralEffusion | 70.3%                    | 29.7%  | 100.0% |        |
|                 | % within AF              | 100.0%                   | 100.0% | 100.0% |        |

**Chi-Square Tests**

|                                    | Value             | df | Asymptotic Significance (2-sided) | Exact Sig. (2-sided) | Exact Sig. (1-sided) |
|------------------------------------|-------------------|----|-----------------------------------|----------------------|----------------------|
| Pearson Chi-Square                 | .267 <sup>a</sup> | 1  | .605                              | .632                 | .468                 |
| Continuity Correction <sup>b</sup> | .000              | 1  | .988                              |                      |                      |
| Likelihood Ratio                   | .253              | 1  | .615                              |                      |                      |
| Fisher's Exact Test                |                   |    |                                   |                      |                      |
| Linear-by-Linear Association       | .264              | 1  | .607                              |                      |                      |
| N of Valid Cases                   | 101               |    |                                   |                      |                      |

a. 2 cells (50.0%) have expected count less than 5. The minimum expected count is 1.49.

b. Computed only for a 2x2 table

**Tamponade \* AF**

**Crosstab**

|           |                    |                    | AF     |        | Total  |
|-----------|--------------------|--------------------|--------|--------|--------|
|           |                    |                    | No     | Yes    |        |
| Tamponade | No                 | Count              | 58     | 29     | 87     |
|           |                    | % within Tamponade | 66.7%  | 33.3%  | 100.0% |
|           |                    | % within AF        | 81.7%  | 96.7%  | 86.1%  |
|           | Yes                | Count              | 13     | 1      | 14     |
|           |                    | % within Tamponade | 92.9%  | 7.1%   | 100.0% |
|           |                    | % within AF        | 18.3%  | 3.3%   | 13.9%  |
| Total     | Count              | 71                 | 30     | 101    |        |
|           | % within Tamponade | 70.3%              | 29.7%  | 100.0% |        |
|           | % within AF        | 100.0%             | 100.0% | 100.0% |        |

**Chi-Square Tests**

|                                    | Value              | df | Asymptotic Significance (2-sided) | Exact Sig. (2-sided) | Exact Sig. (1-sided) |
|------------------------------------|--------------------|----|-----------------------------------|----------------------|----------------------|
| Pearson Chi-Square                 | 3.962 <sup>a</sup> | 1  | .047                              | .059                 | .039                 |
| Continuity Correction <sup>b</sup> | 2.807              | 1  | .094                              |                      |                      |
| Likelihood Ratio                   | 4.924              | 1  | .026                              |                      |                      |
| Fisher's Exact Test                |                    |    |                                   |                      |                      |
| Linear-by-Linear Association       | 3.922              | 1  | .048                              |                      |                      |
| N of Valid Cases                   | 101                |    |                                   |                      |                      |

a. 1 cells (25.0%) have expected count less than 5. The minimum expected count is 4.16.

b. Computed only for a 2x2 table

**Fever \* AF**

**Crosstab**

|       |                |                | AF     |        | Total  |
|-------|----------------|----------------|--------|--------|--------|
|       |                |                | No     | Yes    |        |
| Fever | No             | Count          | 67     | 28     | 95     |
|       |                | % within Fever | 70.5%  | 29.5%  | 100.0% |
|       |                | % within AF    | 94.4%  | 93.3%  | 94.1%  |
|       | Yes            | Count          | 4      | 2      | 6      |
|       |                | % within Fever | 66.7%  | 33.3%  | 100.0% |
|       |                | % within AF    | 5.6%   | 6.7%   | 5.9%   |
| Total | Count          | 71             | 30     | 101    |        |
|       | % within Fever | 70.3%          | 29.7%  | 100.0% |        |
|       | % within AF    | 100.0%         | 100.0% | 100.0% |        |

**Chi-Square Tests**

|                                    | Value             | df | Asymptotic Significance (2-sided) | Exact Sig. (2-sided) | Exact Sig. (1-sided) |
|------------------------------------|-------------------|----|-----------------------------------|----------------------|----------------------|
| Pearson Chi-Square                 | .040 <sup>a</sup> | 1  | .841                              | 1.000                | .579                 |
| Continuity Correction <sup>b</sup> | .000              | 1  | 1.000                             |                      |                      |
| Likelihood Ratio                   | .039              | 1  | .843                              |                      |                      |
| Fisher's Exact Test                |                   |    |                                   |                      |                      |
| Linear-by-Linear Association       | .040              | 1  | .842                              |                      |                      |
| N of Valid Cases                   | 101               |    |                                   |                      |                      |

a. 2 cells (50.0%) have expected count less than 5. The minimum expected count is 1.78.

b. Computed only for a 2x2 table

**Hyperkal \* AF**

**Crosstab**

|          |                   |                   | AF     |        | Total  |
|----------|-------------------|-------------------|--------|--------|--------|
|          |                   |                   | No     | Yes    |        |
| Hyperkal | No                | Count             | 68     | 29     | 97     |
|          |                   | % within Hyperkal | 70.1%  | 29.9%  | 100.0% |
|          |                   | % within AF       | 95.8%  | 96.7%  | 96.0%  |
|          | Yes               | Count             | 3      | 1      | 4      |
|          |                   | % within Hyperkal | 75.0%  | 25.0%  | 100.0% |
|          |                   | % within AF       | 4.2%   | 3.3%   | 4.0%   |
| Total    | Count             | 71                | 30     | 101    |        |
|          | % within Hyperkal | 70.3%             | 29.7%  | 100.0% |        |
|          | % within AF       | 100.0%            | 100.0% | 100.0% |        |

**Chi-Square Tests**

|                                    | Value             | df | Asymptotic Significance (2-sided) | Exact Sig. (2-sided) | Exact Sig. (1-sided) |
|------------------------------------|-------------------|----|-----------------------------------|----------------------|----------------------|
| Pearson Chi-Square                 | .044 <sup>a</sup> | 1  | .834                              | 1.000                | .658                 |
| Continuity Correction <sup>b</sup> | .000              | 1  | 1.000                             |                      |                      |
| Likelihood Ratio                   | .046              | 1  | .831                              |                      |                      |
| Fisher's Exact Test                |                   |    |                                   |                      |                      |
| Linear-by-Linear Association       | .044              | 1  | .834                              |                      |                      |
| N of Valid Cases                   | 101               |    |                                   |                      |                      |

a. 2 cells (50.0%) have expected count less than 5. The minimum expected count is 1.19.

b. Computed only for a 2x2 table

**others \* AF**

**Crosstab**

|        |                 |                 | AF     |        | Total  |
|--------|-----------------|-----------------|--------|--------|--------|
|        |                 |                 | No     | Yes    |        |
| others | No              | Count           | 70     | 28     | 98     |
|        |                 | % within others | 71.4%  | 28.6%  | 100.0% |
|        |                 | % within AF     | 98.6%  | 93.3%  | 97.0%  |
|        | Yes             | Count           | 1      | 2      | 3      |
|        |                 | % within others | 33.3%  | 66.7%  | 100.0% |
|        |                 | % within AF     | 1.4%   | 6.7%   | 3.0%   |
| Total  | Count           | 71              | 30     | 101    |        |
|        | % within others | 70.3%           | 29.7%  | 100.0% |        |
|        | % within AF     | 100.0%          | 100.0% | 100.0% |        |

**Chi-Square Tests**

|                                    | Value              | df | Asymptotic Significance (2-sided) | Exact Sig. (2-sided) | Exact Sig. (1-sided) |
|------------------------------------|--------------------|----|-----------------------------------|----------------------|----------------------|
| Pearson Chi-Square                 | 2.023 <sup>a</sup> | 1  | .155                              | .210                 | .210                 |
| Continuity Correction <sup>b</sup> | .610               | 1  | .435                              |                      |                      |
| Likelihood Ratio                   | 1.802              | 1  | .179                              |                      |                      |
| Fisher's Exact Test                |                    |    |                                   |                      |                      |
| Linear-by-Linear Association       | 2.003              | 1  | .157                              |                      |                      |
| N of Valid Cases                   | 101                |    |                                   |                      |                      |

a. 2 cells (50.0%) have expected count less than 5. The minimum expected count is .89.

b. Computed only for a 2x2 table

**Death \* AF**

**Crosstab**

|       |                |                | AF     |        | Total  |
|-------|----------------|----------------|--------|--------|--------|
|       |                |                | No     | Yes    |        |
| Death | No             | Count          | 69     | 24     | 93     |
|       |                | % within Death | 74.2%  | 25.8%  | 100.0% |
|       |                | % within AF    | 97.2%  | 80.0%  | 92.1%  |
|       | Yes            | Count          | 2      | 6      | 8      |
|       |                | % within Death | 25.0%  | 75.0%  | 100.0% |
|       |                | % within AF    | 2.8%   | 20.0%  | 7.9%   |
| Total | Count          | 71             | 30     | 101    |        |
|       | % within Death | 70.3%          | 29.7%  | 100.0% |        |
|       | % within AF    | 100.0%         | 100.0% | 100.0% |        |

### Chi-Square Tests

|                                    | Value              | df | Asymptotic<br>Significance (2-<br>sided) | Exact Sig. (2-<br>sided) | Exact Sig. (1-<br>sided) |
|------------------------------------|--------------------|----|------------------------------------------|--------------------------|--------------------------|
| Pearson Chi-Square                 | 8.538 <sup>a</sup> | 1  | .003                                     |                          |                          |
| Continuity Correction <sup>b</sup> | 6.344              | 1  | .012                                     |                          |                          |
| Likelihood Ratio                   | 7.674              | 1  | .006                                     |                          |                          |
| Fisher's Exact Test                |                    |    |                                          | .008                     | .008                     |
| Linear-by-Linear<br>Association    | 8.453              | 1  | .004                                     |                          |                          |
| N of Valid Cases                   | 101                |    |                                          |                          |                          |

a. 1 cells (25.0%) have expected count less than 5. The minimum expected count is 2.38.

b. Computed only for a 2x2 table

```

EXAMINE VARIABLES=VENT CICUstay HDUstay HospStay BY AF
/PLOT BOXPLOT STEMLEAF NPLOT
/COMPARE GROUPS
/STATISTICS DESCRIPTIVES
/CINTERVAL 95
/MISSING LISTWISE
/NOTOTAL.
    
```

## Explore

**Notes**

|                        |                                                                                                                                                                                     |                                                                                                       |
|------------------------|-------------------------------------------------------------------------------------------------------------------------------------------------------------------------------------|-------------------------------------------------------------------------------------------------------|
| Output Created         | 01-MAR-2021 14:55:19                                                                                                                                                                |                                                                                                       |
| Comments               |                                                                                                                                                                                     |                                                                                                       |
| Input                  | Data                                                                                                                                                                                | C:\Users\user\Downloads\ImAnisah<br>Statistic & SPSS\TOCO T3\Data<br>toco.sav                         |
|                        | Active Dataset                                                                                                                                                                      | DataSet1                                                                                              |
|                        | Filter                                                                                                                                                                              | <none>                                                                                                |
|                        | Weight                                                                                                                                                                              | <none>                                                                                                |
|                        | Split File                                                                                                                                                                          | <none>                                                                                                |
|                        | N of Rows in Working Data<br>File                                                                                                                                                   | 156                                                                                                   |
| Missing Value Handling | Definition of Missing                                                                                                                                                               | User-defined missing values for<br>dependent variables are treated as<br>missing.                     |
|                        | Cases Used                                                                                                                                                                          | Statistics are based on cases with<br>no missing values for any dependent<br>variable or factor used. |
| Syntax                 | <pre> EXAMINE VARIABLES=VENT CICUstay HDUstay HospStay BY AF /PLOT BOXPLOT STEMLEAF NPLOT /COMPARE GROUPS /STATISTICS DESCRIPTIVES /CINTERVAL 95 /MISSING LISTWISE /NOTOTAL. </pre> |                                                                                                       |
| Resources              | Processor Time                                                                                                                                                                      | 00:00:08.58                                                                                           |
|                        | Elapsed Time                                                                                                                                                                        | 00:00:07.88                                                                                           |

**AF**

**Case Processing Summary**

|                       |     | Cases |         |         |         |       |         |
|-----------------------|-----|-------|---------|---------|---------|-------|---------|
|                       |     | Valid |         | Missing |         | Total |         |
|                       |     | N     | Percent | N       | Percent | N     | Percent |
| Total hours intubated | No  | 32    | 27.1%   | 86      | 72.9%   | 118   | 100.0%  |
|                       | Yes | 18    | 47.4%   | 20      | 52.6%   | 38    | 100.0%  |
| CICUstay              | No  | 32    | 27.1%   | 86      | 72.9%   | 118   | 100.0%  |
|                       | Yes | 18    | 47.4%   | 20      | 52.6%   | 38    | 100.0%  |
| HDUstay               | No  | 32    | 27.1%   | 86      | 72.9%   | 118   | 100.0%  |
|                       | Yes | 18    | 47.4%   | 20      | 52.6%   | 38    | 100.0%  |
| HospStay              | No  | 32    | 27.1%   | 86      | 72.9%   | 118   | 100.0%  |
|                       | Yes | 18    | 47.4%   | 20      | 52.6%   | 38    | 100.0%  |

**Descriptives**

| AF                    |             | Statistic                        | Std. Error  |                                  |             |         |
|-----------------------|-------------|----------------------------------|-------------|----------------------------------|-------------|---------|
| Total hours intubated | No          | Mean                             | 1413.56     | 170.067                          |             |         |
|                       |             | 95% Confidence Interval for Mean | Lower Bound | 1066.71                          |             |         |
|                       |             |                                  | Upper Bound | 1760.42                          |             |         |
|                       |             | 5% Trimmed Mean                  | 1257.64     |                                  |             |         |
|                       |             | Median                           | 1157.50     |                                  |             |         |
|                       |             | Variance                         | 925533.609  |                                  |             |         |
|                       |             | Std. Deviation                   | 962.047     |                                  |             |         |
|                       |             | Minimum                          | 860         |                                  |             |         |
|                       |             | Maximum                          | 6375        |                                  |             |         |
|                       |             | Range                            | 5515        |                                  |             |         |
|                       |             | Interquartile Range              | 391         |                                  |             |         |
|                       |             | Skewness                         | 4.707       | .414                             |             |         |
|                       |             | Kurtosis                         | 24.432      | .809                             |             |         |
|                       |             |                                  | Yes         | Mean                             | 1902.89     | 403.849 |
|                       |             |                                  |             | 95% Confidence Interval for Mean | Lower Bound | 1050.84 |
| Upper Bound           | 2754.94     |                                  |             |                                  |             |         |
| 5% Trimmed Mean       | 1669.04     |                                  |             |                                  |             |         |
| Median                | 1230.00     |                                  |             |                                  |             |         |
| Variance              | 2935687.399 |                                  |             |                                  |             |         |
| Std. Deviation        | 1713.385    |                                  |             |                                  |             |         |
| Minimum               | 635         |                                  |             |                                  |             |         |
| Maximum               | 7380        |                                  |             |                                  |             |         |
| Range                 | 6745        |                                  |             |                                  |             |         |
| Interquartile Range   | 875         |                                  |             |                                  |             |         |
| Skewness              | 2.514       |                                  |             | .536                             |             |         |
| Kurtosis              | 6.254       |                                  |             | 1.038                            |             |         |
| CICUstay              | No          |                                  |             | Mean                             | 2649.41     | 310.869 |
|                       |             |                                  |             | 95% Confidence Interval for Mean | Lower Bound | 2015.39 |
|                       |             | Upper Bound                      | 3283.43     |                                  |             |         |
|                       |             | 5% Trimmed Mean                  | 2516.56     |                                  |             |         |
|                       |             | Median                           | 1742.00     |                                  |             |         |
|                       |             | Variance                         | 3092457.926 |                                  |             |         |
|                       |             | Std. Deviation                   | 1758.539    |                                  |             |         |
|                       |             | Minimum                          | 750         |                                  |             |         |
|                       |             | Maximum                          | 7420        |                                  |             |         |
|                       |             | Range                            | 6670        |                                  |             |         |
|                       |             | Interquartile Range              | 2354        |                                  |             |         |
|                       |             | Skewness                         | 1.177       | .414                             |             |         |
|                       |             | Kurtosis                         | .463        | .809                             |             |         |
|                       |             |                                  | Yes         | Mean                             | 5075.00     | 888.902 |
|                       |             |                                  |             | 95% Confidence Interval for Mean | Lower Bound | 3199.58 |
| Upper Bound           | 6950.42     |                                  |             |                                  |             |         |
| 5% Trimmed Mean       | 4741.67     |                                  |             |                                  |             |         |

**Descriptives**

| AF                  |                     | Statistic                        | Std. Error                                       |         |
|---------------------|---------------------|----------------------------------|--------------------------------------------------|---------|
|                     | Median              | 3847.50                          |                                                  |         |
|                     | Variance            | 14222626.47                      |                                                  |         |
|                     | Std. Deviation      | 3771.290                         |                                                  |         |
|                     | Minimum             | 690                              |                                                  |         |
|                     | Maximum             | 15460                            |                                                  |         |
|                     | Range               | 14770                            |                                                  |         |
|                     | Interquartile Range | 4773                             |                                                  |         |
|                     | Skewness            | 1.259                            | .536                                             |         |
|                     | Kurtosis            | 1.940                            | 1.038                                            |         |
| HDUstay             | No                  | Mean                             | 2243.59                                          | 299.573 |
|                     |                     | 95% Confidence Interval for Mean | Lower Bound<br>1632.61<br>Upper Bound<br>2854.58 |         |
|                     |                     | 5% Trimmed Mean                  | 2040.52                                          |         |
|                     |                     | Median                           | 1480.00                                          |         |
|                     |                     | Variance                         | 2871800.378                                      |         |
|                     |                     | Std. Deviation                   | 1694.639                                         |         |
|                     |                     | Minimum                          | 330                                              |         |
|                     |                     | Maximum                          | 7610                                             |         |
|                     |                     | Range                            | 7280                                             |         |
|                     |                     | Interquartile Range              | 1514                                             |         |
|                     |                     | Skewness                         | 2.081                                            | .414    |
|                     |                     | Kurtosis                         | 4.228                                            | .809    |
|                     | Yes                 | Mean                             | 2396.67                                          | 360.014 |
|                     |                     | 95% Confidence Interval for Mean | Lower Bound<br>1637.10<br>Upper Bound<br>3156.23 |         |
|                     |                     | 5% Trimmed Mean                  | 2319.63                                          |         |
|                     |                     | Median                           | 1755.00                                          |         |
|                     |                     | Variance                         | 2332976.471                                      |         |
|                     |                     | Std. Deviation                   | 1527.408                                         |         |
|                     |                     | Minimum                          | 405                                              |         |
|                     |                     | Maximum                          | 5775                                             |         |
| Range               |                     | 5370                             |                                                  |         |
| Interquartile Range |                     | 2743                             |                                                  |         |
|                     | Skewness            | .918                             | .536                                             |         |
|                     | Kurtosis            | -.328                            | 1.038                                            |         |
| HospStay            | No                  | Mean                             | 7.91                                             | .441    |
|                     |                     | 95% Confidence Interval for Mean | Lower Bound<br>7.01<br>Upper Bound<br>8.81       |         |
|                     |                     | 5% Trimmed Mean                  | 7.54                                             |         |
|                     |                     | Median                           | 7.00                                             |         |
|                     |                     | Variance                         | 6.217                                            |         |
|                     |                     | Std. Deviation                   | 2.493                                            |         |
|                     |                     | Minimum                          | 6                                                |         |



### Descriptives

| AF  |                                  | Statistic            | Std. Error |
|-----|----------------------------------|----------------------|------------|
|     | Maximum                          | 19                   |            |
|     | Range                            | 13                   |            |
|     | Interquartile Range              | 3                    |            |
|     | Skewness                         | 3.097                | .414       |
|     | Kurtosis                         | 12.477               | .809       |
| Yes | Mean                             | 9.78                 | .823       |
|     | 95% Confidence Interval for Mean | Lower Bound<br>8.04  |            |
|     |                                  | Upper Bound<br>11.51 |            |
|     | 5% Trimmed Mean                  | 9.36                 |            |
|     | Median                           | 9.00                 |            |
|     | Variance                         | 12.183               |            |
|     | Std. Deviation                   | 3.490                |            |
|     | Minimum                          | 6                    |            |
|     | Maximum                          | 21                   |            |
|     | Range                            | 15                   |            |
|     | Interquartile Range              | 3                    |            |
|     | Skewness                         | 2.067                | .536       |
|     | Kurtosis                         | 5.778                | 1.038      |

### Tests of Normality

|                       | AF  | Kolmogorov-Smirnov <sup>a</sup> |    |      | Shapiro-Wilk |    |      |
|-----------------------|-----|---------------------------------|----|------|--------------|----|------|
|                       |     | Statistic                       | df | Sig. | Statistic    | df | Sig. |
| Total hours intubated | No  | .320                            | 32 | .000 | .446         | 32 | .000 |
|                       | Yes | .334                            | 18 | .000 | .628         | 18 | .000 |
| CICUstay              | No  | .215                            | 32 | .001 | .843         | 32 | .000 |
|                       | Yes | .187                            | 18 | .097 | .888         | 18 | .036 |
| HDUstay               | No  | .300                            | 32 | .000 | .712         | 32 | .000 |
|                       | Yes | .292                            | 18 | .000 | .861         | 18 | .013 |
| HospStay              | No  | .236                            | 32 | .000 | .667         | 32 | .000 |
|                       | Yes | .252                            | 18 | .004 | .791         | 18 | .001 |

a. Lilliefors Significance Correction

## Total hours intubated

### Stem-and-Leaf Plots

Total hours intubated Stem-and-Leaf Plot for  
AF= No

```

Frequency      Stem & Leaf
      3.00      8 . 688
    
```

```

1.00      9 .  0
2.00      9 . 79
2.00     10 . 02
4.00     10 . 7889
4.00     11 . 2334
1.00     11 .  7
1.00     12 .  0
4.00     12 . 9999
.00      13 .
2.00     13 . 56
1.00     14 .  4
2.00     14 . 67
.00      15 .
.00      15 .
1.00     16 .  4
4.00 Extremes    (>=2048)

```

```

Stem width:      100
Each leaf:       1 case(s)

```

Total hours intubated Stem-and-Leaf Plot for  
AF= Yes

```

Frequency      Stem & Leaf

    2.00        0 .  69
   11.00        1 . 00001122344
    1.00        1 .  6
    .00         2 .
    1.00        2 .  6
    3.00 Extremes    (>=2750)

```

```

Stem width:      1000
Each leaf:       1 case(s)

```

## Normal Q-Q Plots

**Normal Q-Q Plot of Total hours intubated**  
for AF= No

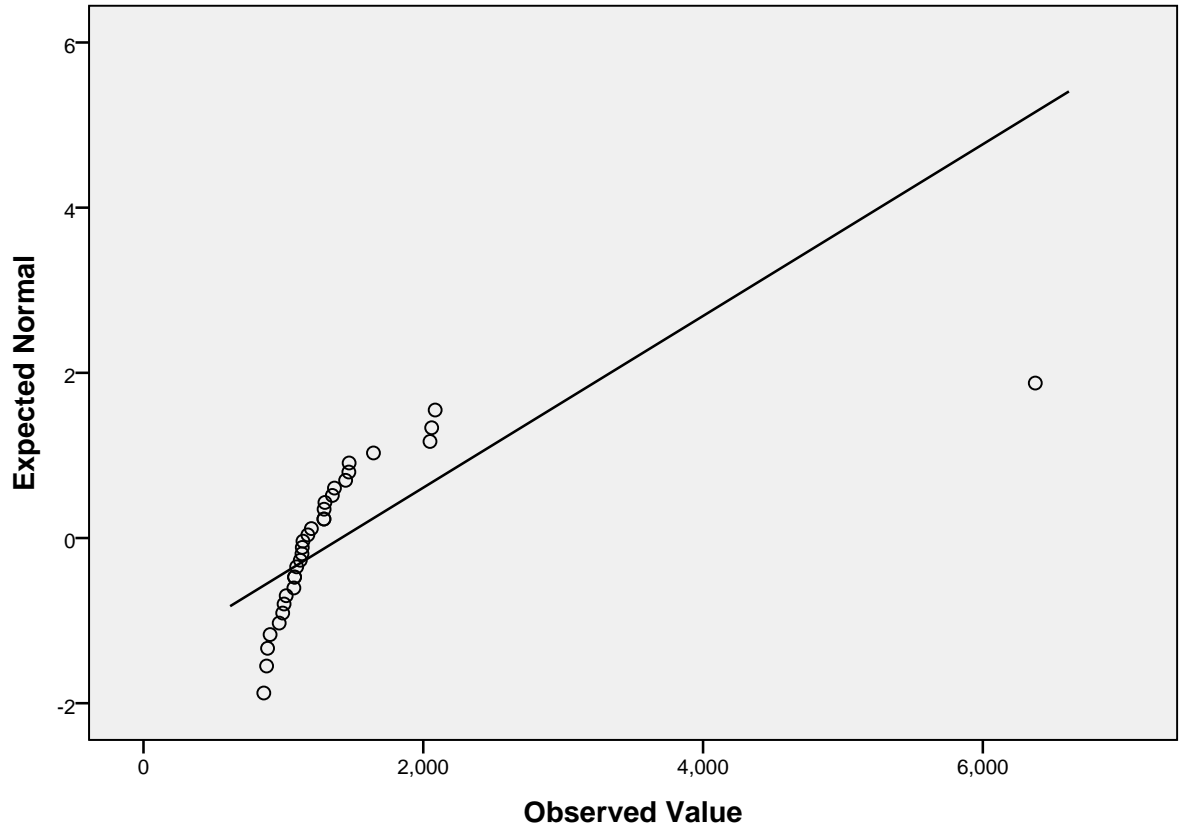

**Normal Q-Q Plot of Total hours intubated  
for AF= Yes**

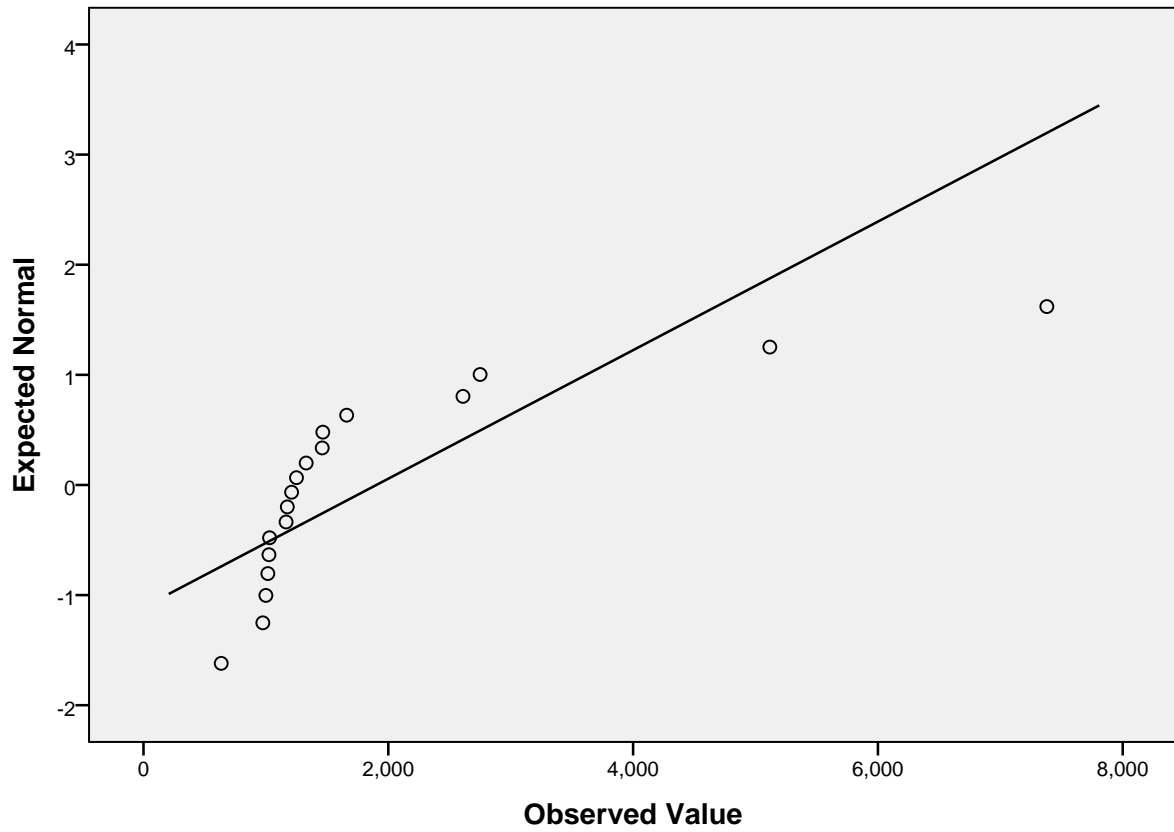

**Detrended Normal Q-Q Plots**

**Detrended Normal Q-Q Plot of Total hours intubated**  
**for AF= No**

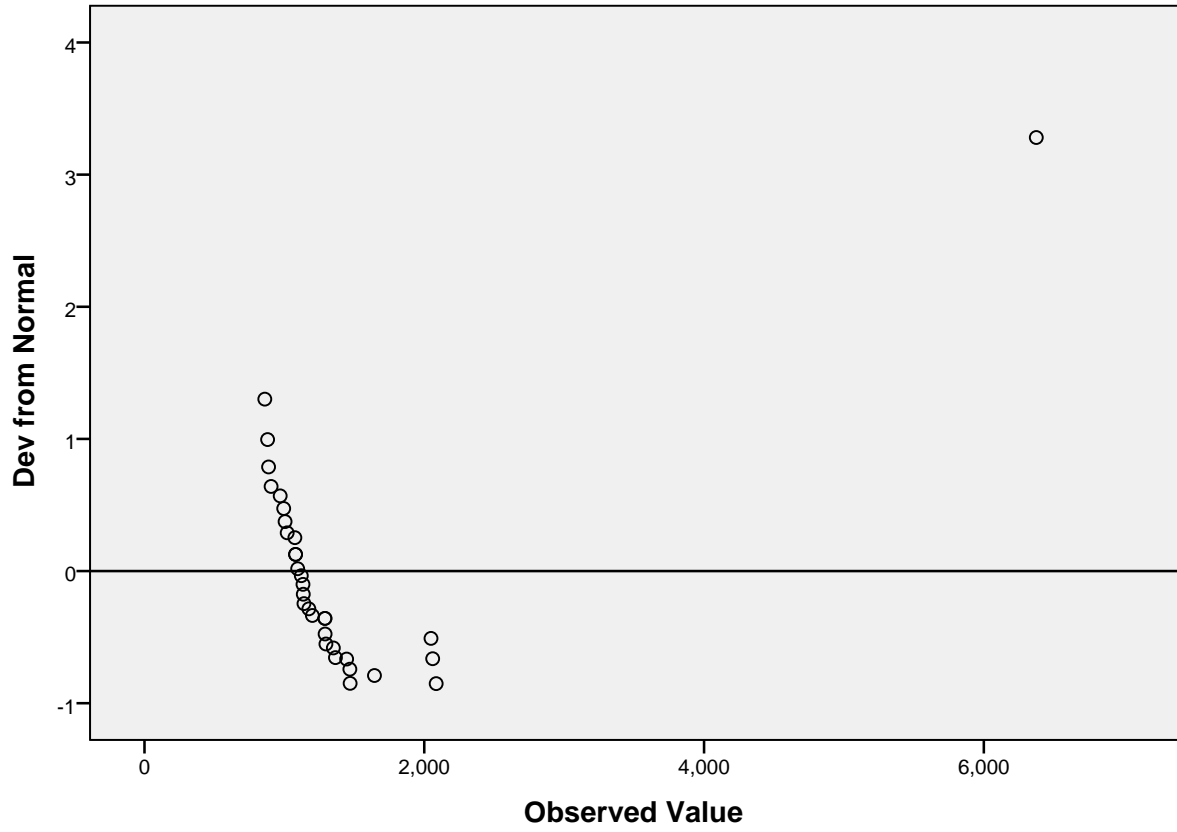

**Detrended Normal Q-Q Plot of Total hours intubated  
for AF= Yes**

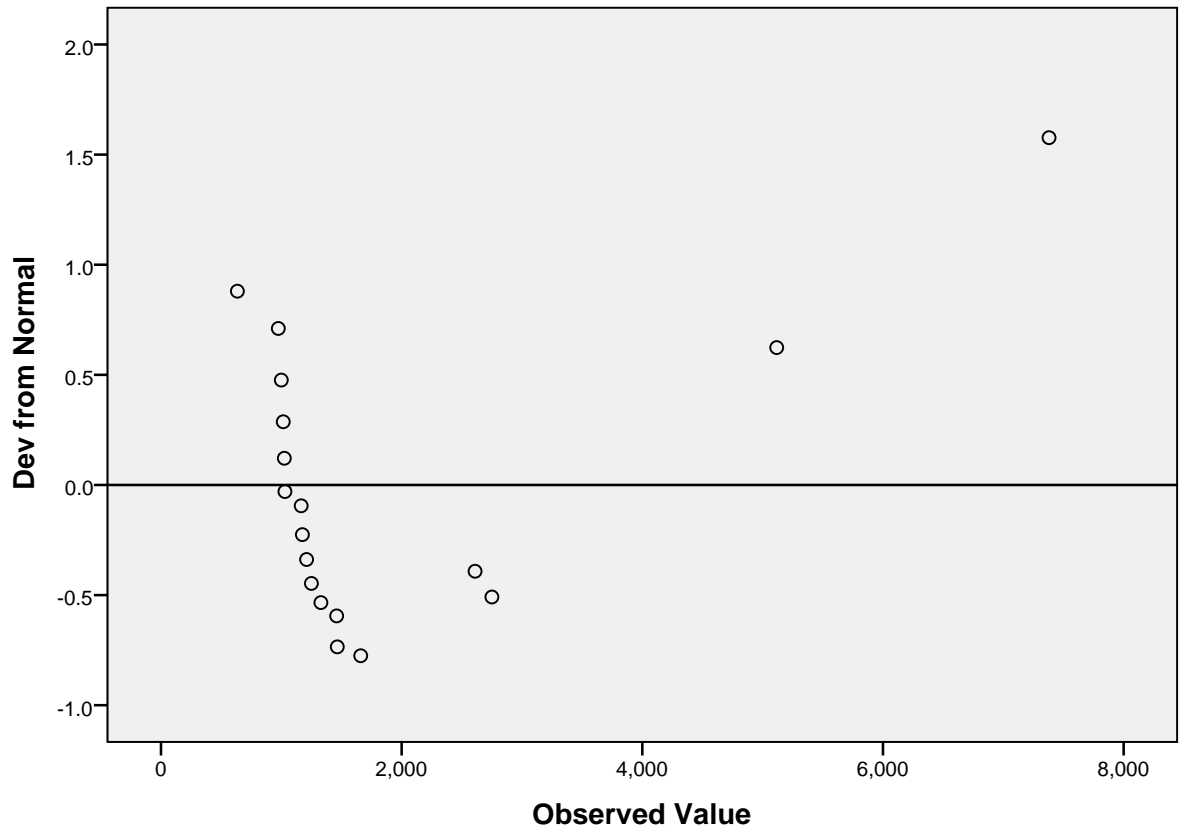

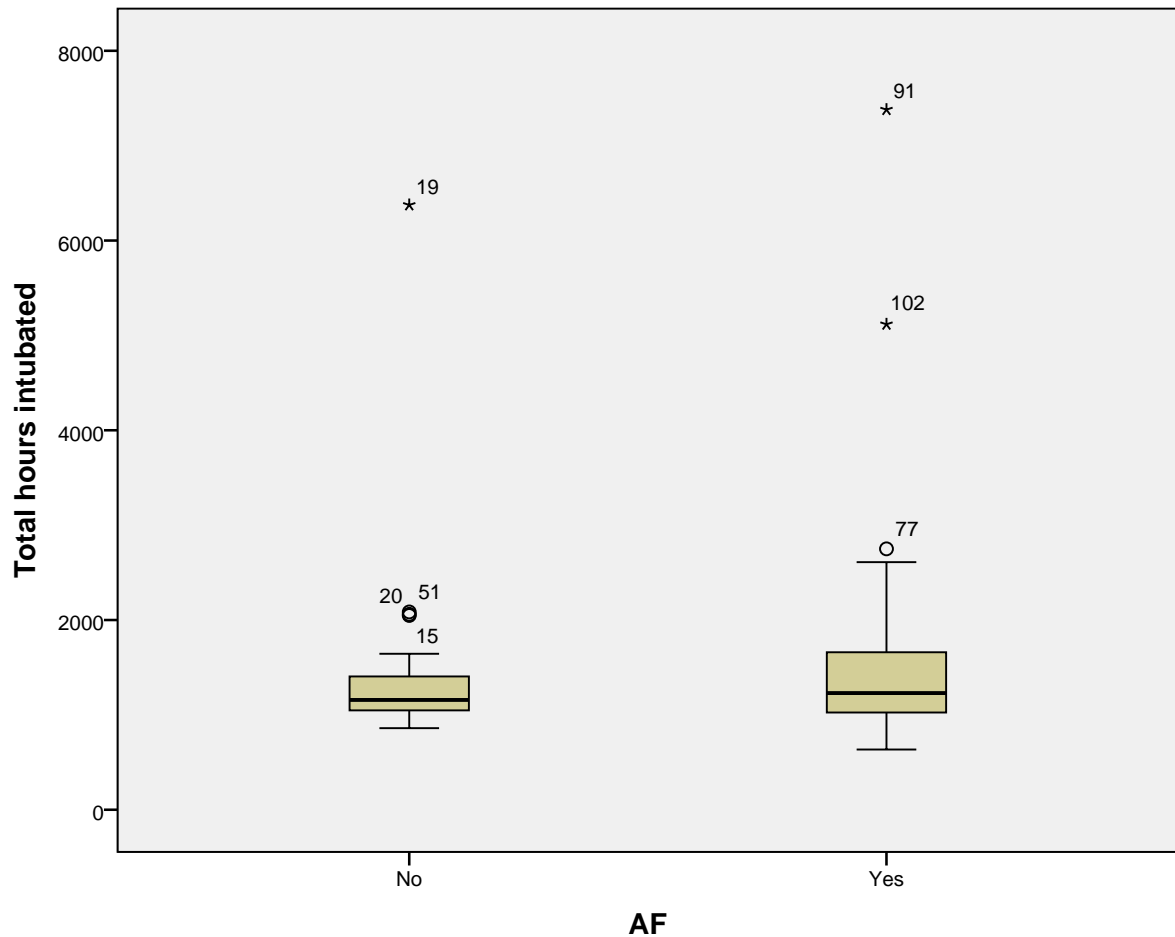

## CICUstay

### Stem-and-Leaf Plots

CICUstay Stem-and-Leaf Plot for  
AF= No

| Frequency | Stem &   | Leaf       |
|-----------|----------|------------|
| 2.00      | 0 .      | 79         |
| 10.00     | 1 .      | 0222333444 |
| 5.00      | 1 .      | 55668      |
| 1.00      | 2 .      | 1          |
| 5.00      | 2 .      | 77888      |
| 1.00      | 3 .      | 0          |
| 2.00      | 3 .      | 89         |
| .00       | 4 .      |            |
| 1.00      | 4 .      | 6          |
| 2.00      | 5 .      | 34         |
| 2.00      | 5 .      | 69         |
| 1.00      | Extremes | (>=7420)   |

Stem width: 1000  
Each leaf: 1 case(s)

CICUstay Stem-and-Leaf Plot for  
AF= Yes

| Frequency | Stem &   | Leaf      |
|-----------|----------|-----------|
| 1.00      | 0 .      | 6         |
| 3.00      | 1 .      | 157       |
| 4.00      | 2 .      | 5789      |
| 1.00      | 3 .      | 2         |
| 1.00      | 4 .      | 4         |
| 1.00      | 5 .      | 6         |
| 1.00      | 6 .      | 7         |
| 3.00      | 7 .      | 001       |
| 1.00      | 8 .      | 4         |
| 1.00      | 9 .      | 9         |
| 1.00      | Extremes | (>=15460) |

Stem width: 1000  
Each leaf: 1 case(s)

## Normal Q-Q Plots



### Normal Q-Q Plot of CICUstay

for AF= No

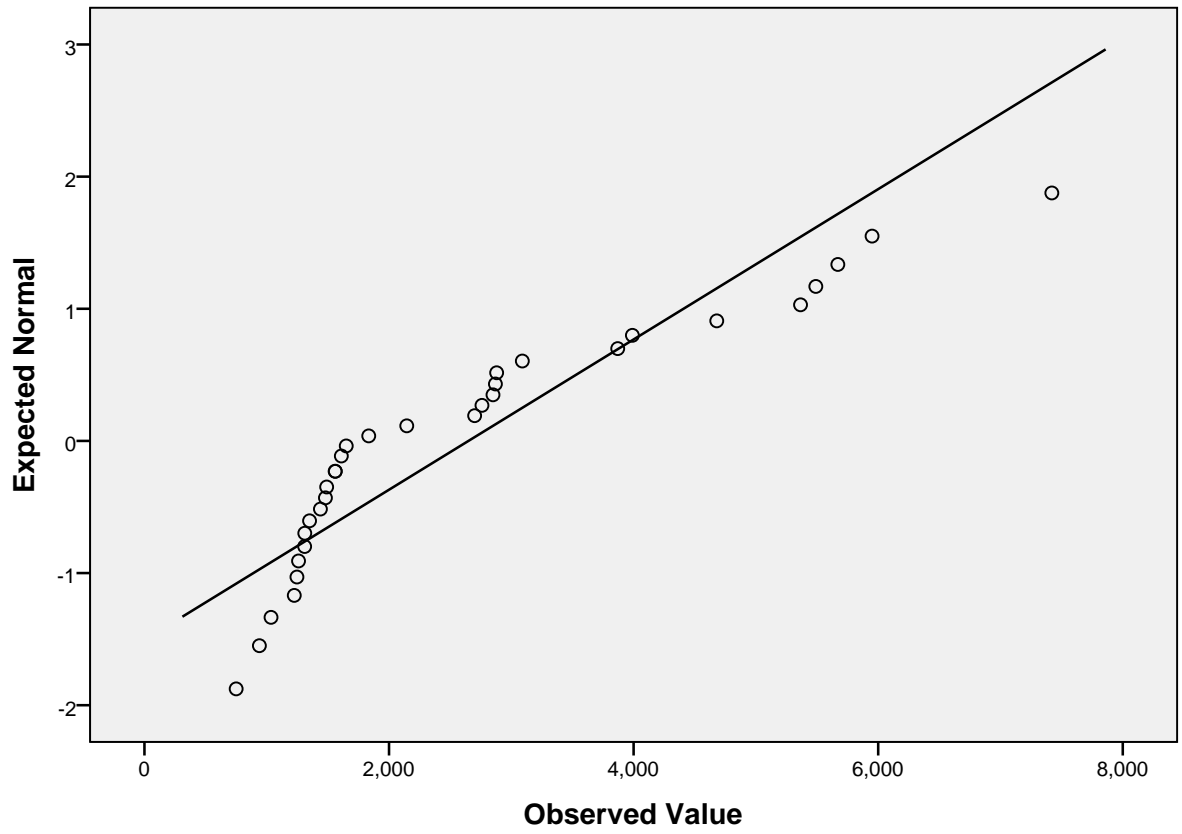

**Normal Q-Q Plot of CICUstay**  
for AF= Yes

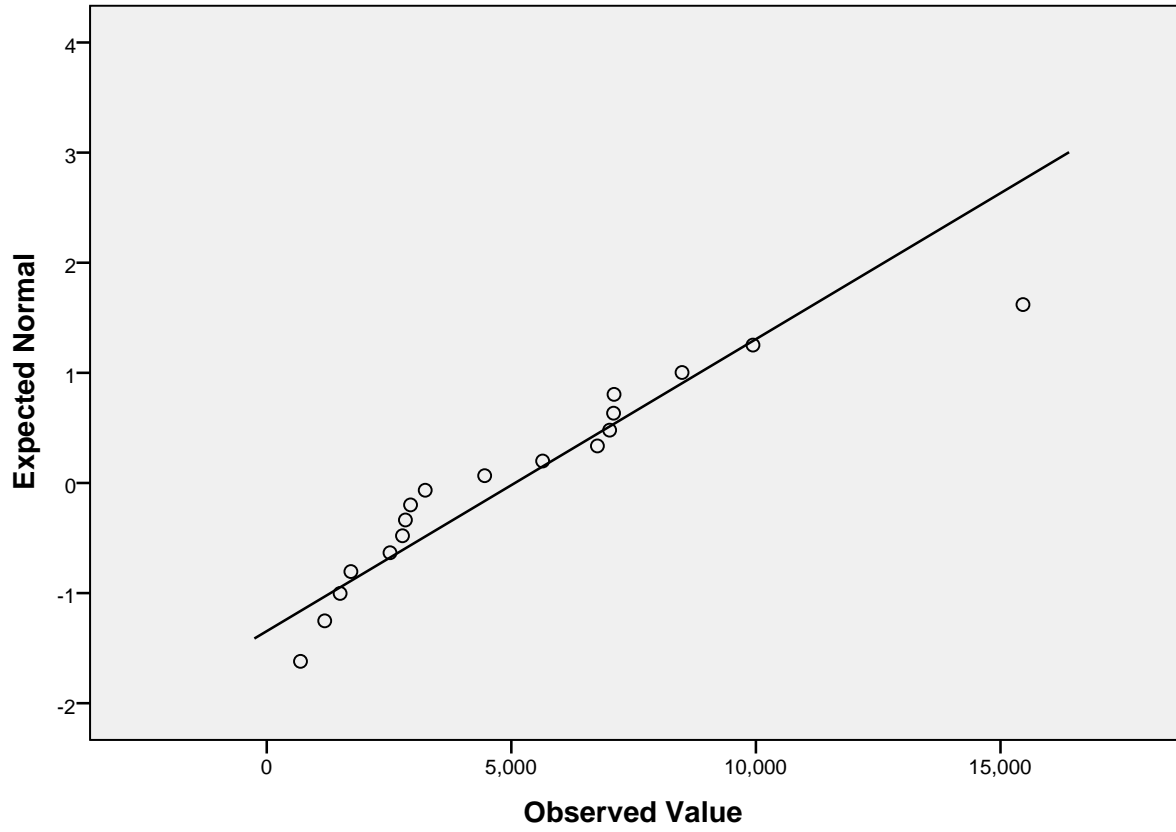

**Detrended Normal Q-Q Plots**

**Detrended Normal Q-Q Plot of CICUstay**

for AF= No

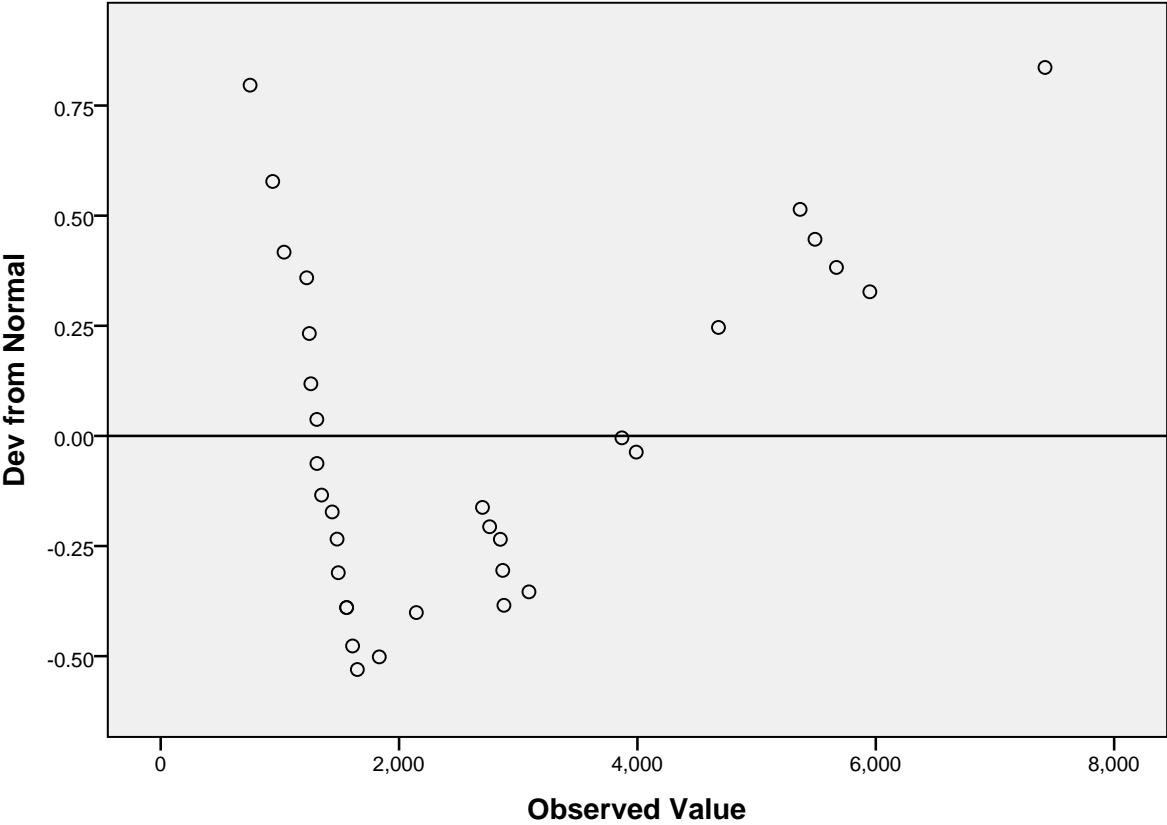

**Detrended Normal Q-Q Plot of CICUstay**

for AF= Yes

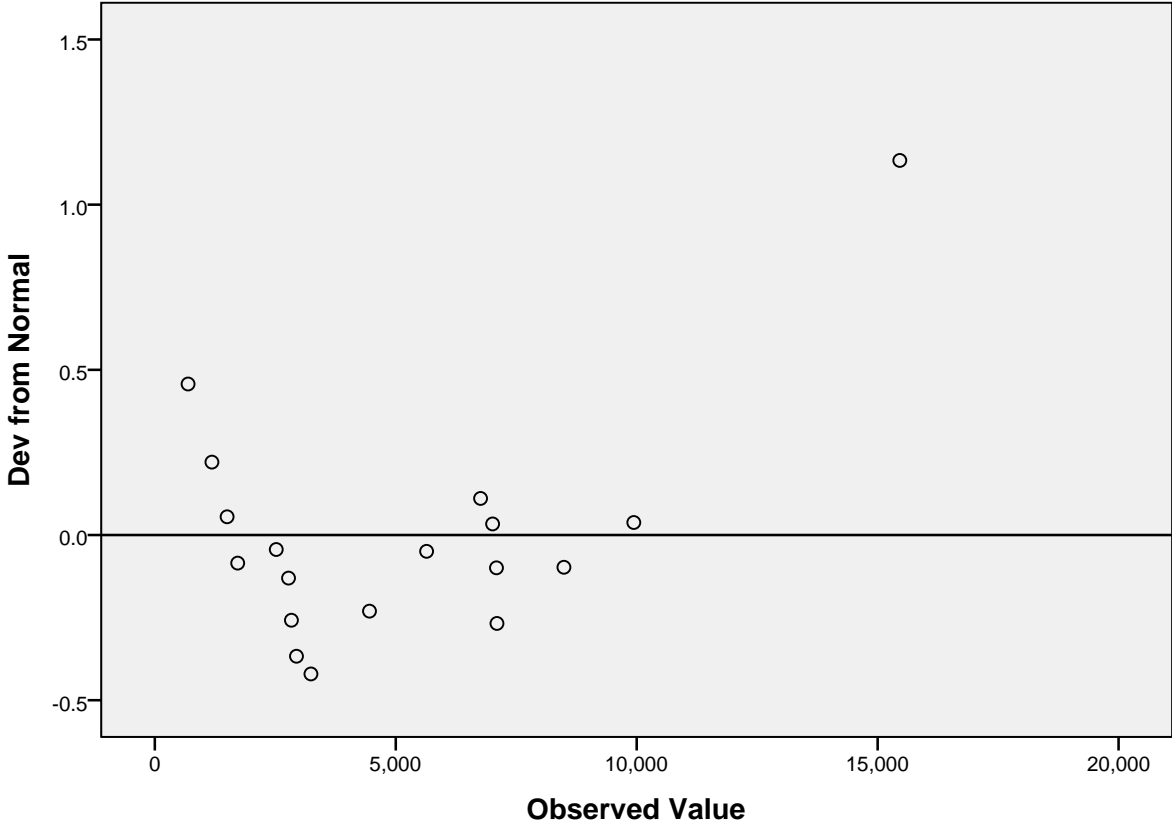

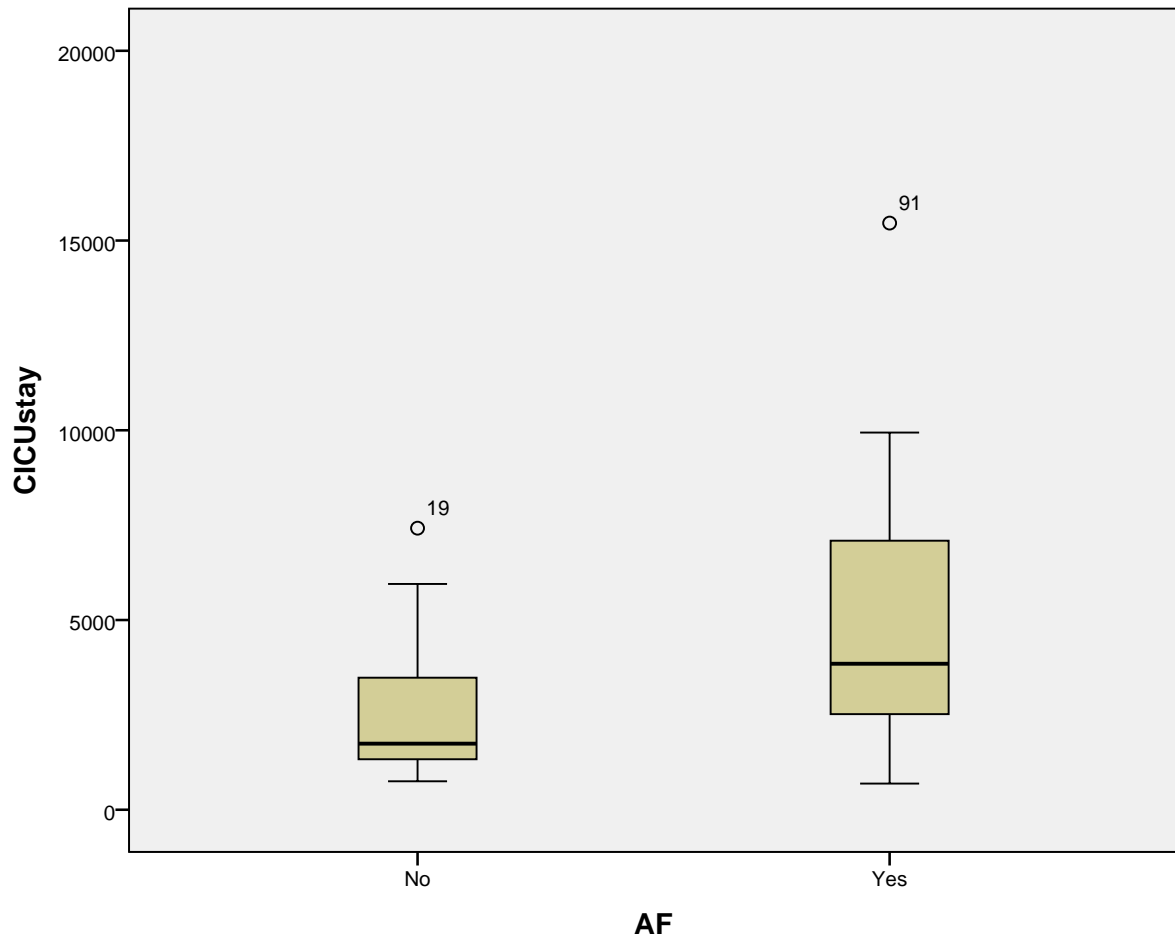

## HDUstay

### Stem-and-Leaf Plots

HDUstay Stem-and-Leaf Plot for  
AF= No

| Frequency | Stem &   | Leaf             |
|-----------|----------|------------------|
| 1.00      | 0 .      | 3                |
| .00       | 0 .      |                  |
| 16.00     | 1 .      | 1112223333344444 |
| 5.00      | 1 .      | 55569            |
| .00       | 2 .      |                  |
| 4.00      | 2 .      | 5789             |
| 1.00      | 3 .      | 1                |
| .00       | 3 .      |                  |
| 3.00      | 4 .      | 234              |
| 2.00      | Extremes | (>=7340)         |

Stem width: 1000

Each leaf: 1 case(s)

HDUstay Stem-and-Leaf Plot for  
AF= Yes

| Frequency | Stem & | Leaf   |
|-----------|--------|--------|
| 1.00      | 0 .    | 4      |
| 1.00      | 0 .    | 9      |
| 4.00      | 1 .    | 0344   |
| 6.00      | 1 .    | 566889 |
| .00       | 2 .    |        |
| 1.00      | 2 .    | 9      |
| .00       | 3 .    |        |
| .00       | 3 .    |        |
| 3.00      | 4 .    | 112    |
| 1.00      | 4 .    | 6      |
| .00       | 5 .    |        |
| 1.00      | 5 .    | 7      |

Stem width: 1000  
Each leaf: 1 case(s)

## Normal Q-Q Plots

**Normal Q-Q Plot of HDUstay**  
for AF= No

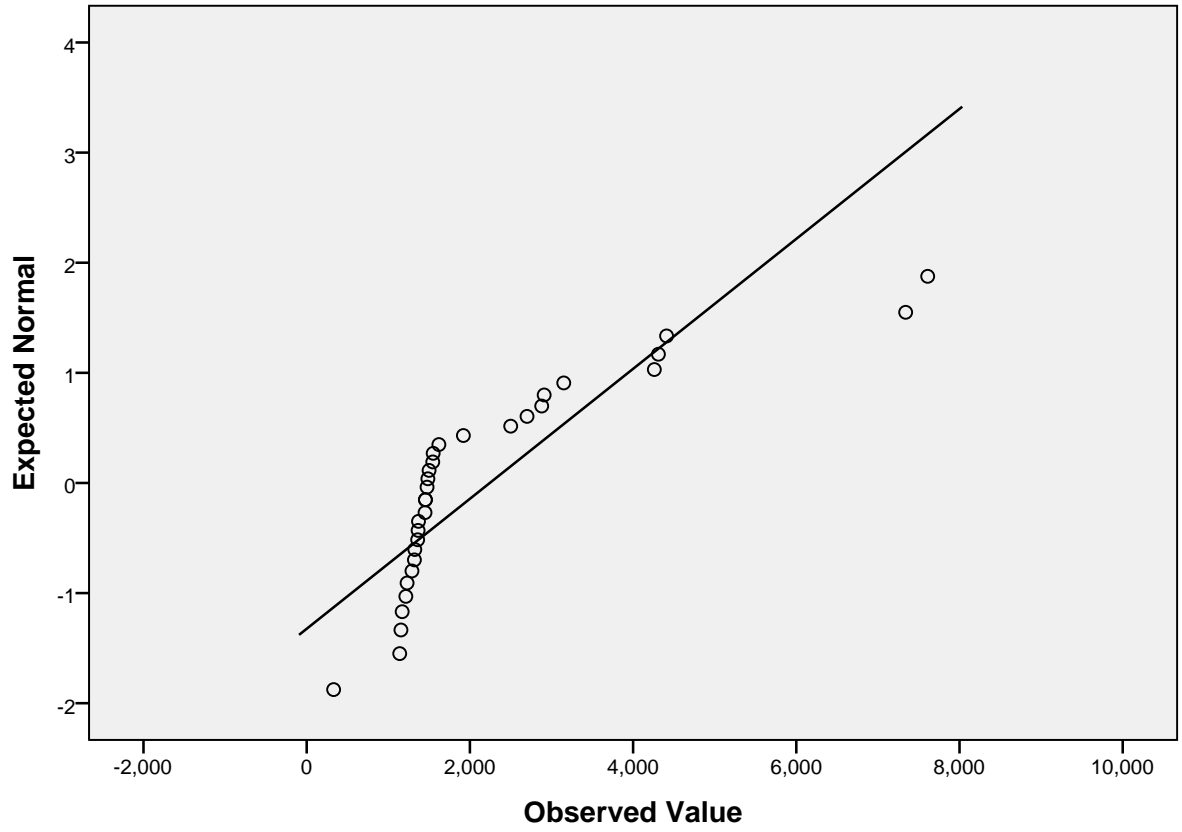

**Normal Q-Q Plot of HDUstay  
for AF= Yes**

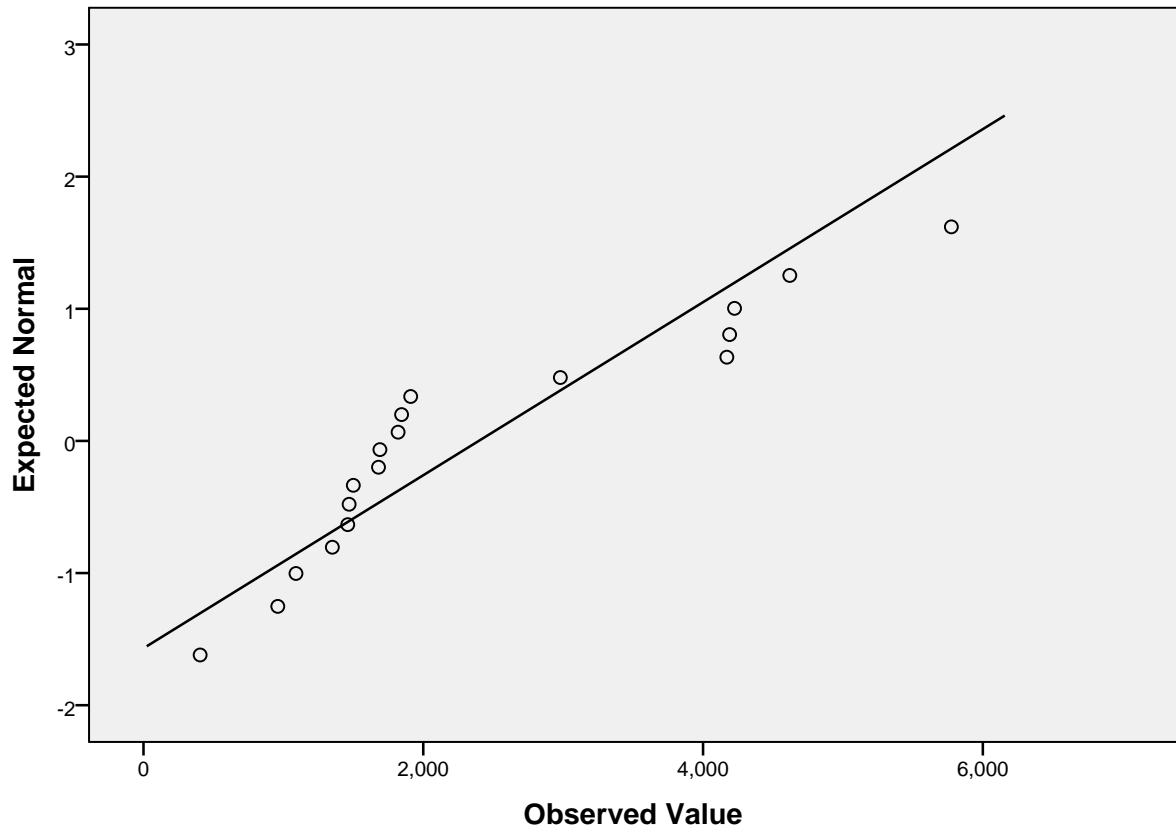

**Detrended Normal Q-Q Plots**



**Detrended Normal Q-Q Plot of HDUstay**  
for AF= No

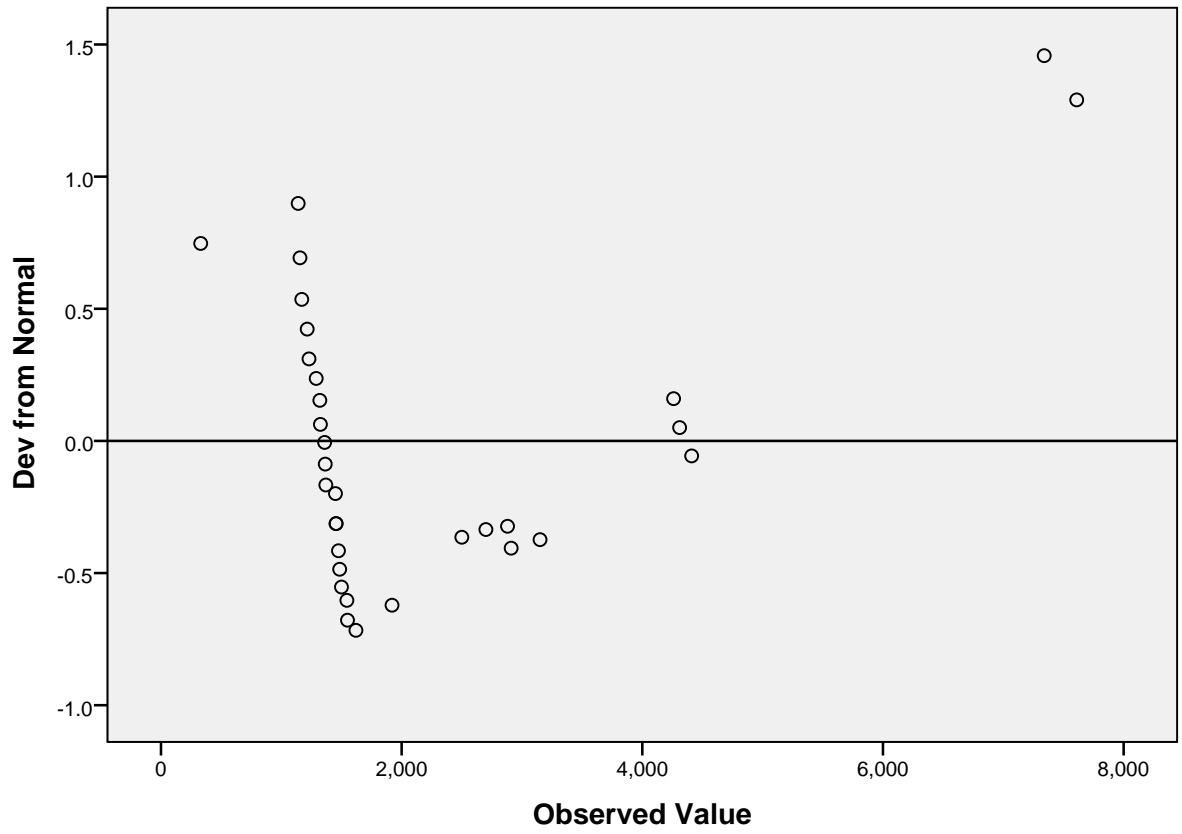

**Detrended Normal Q-Q Plot of HDUstay**  
**for AF= Yes**

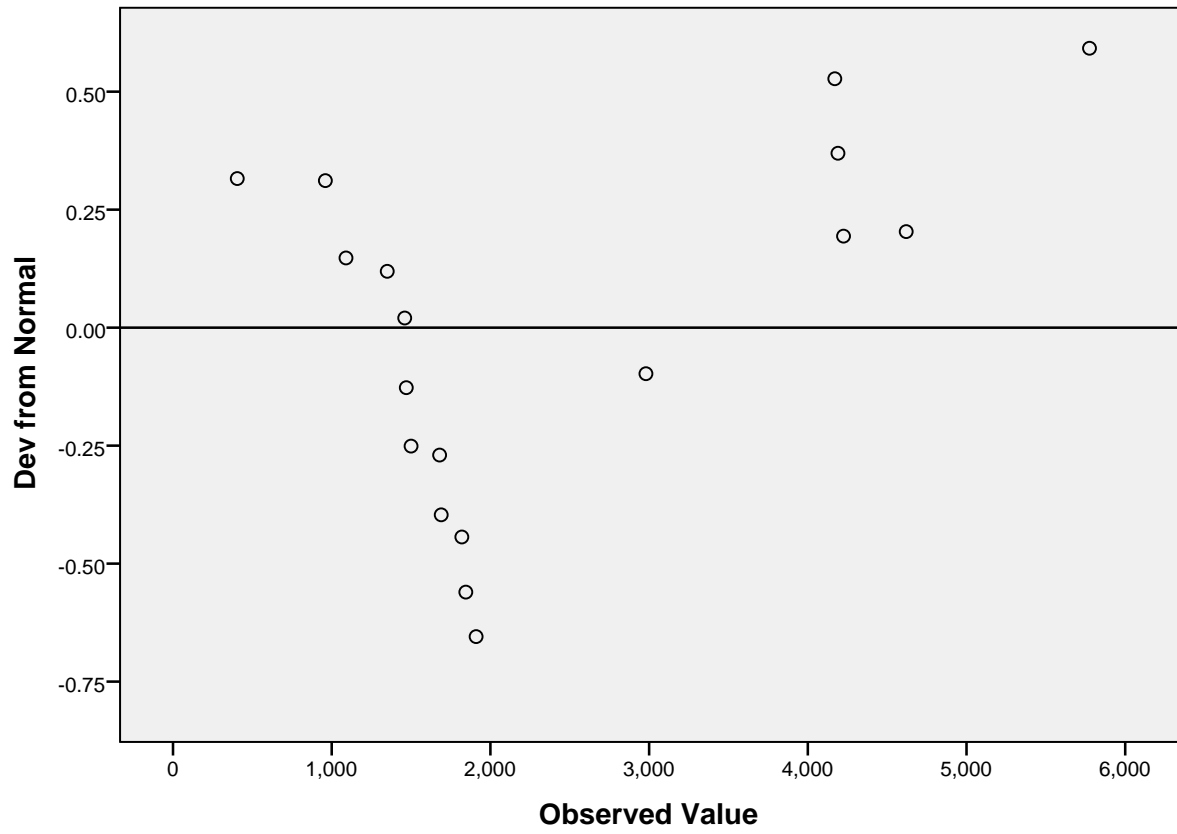

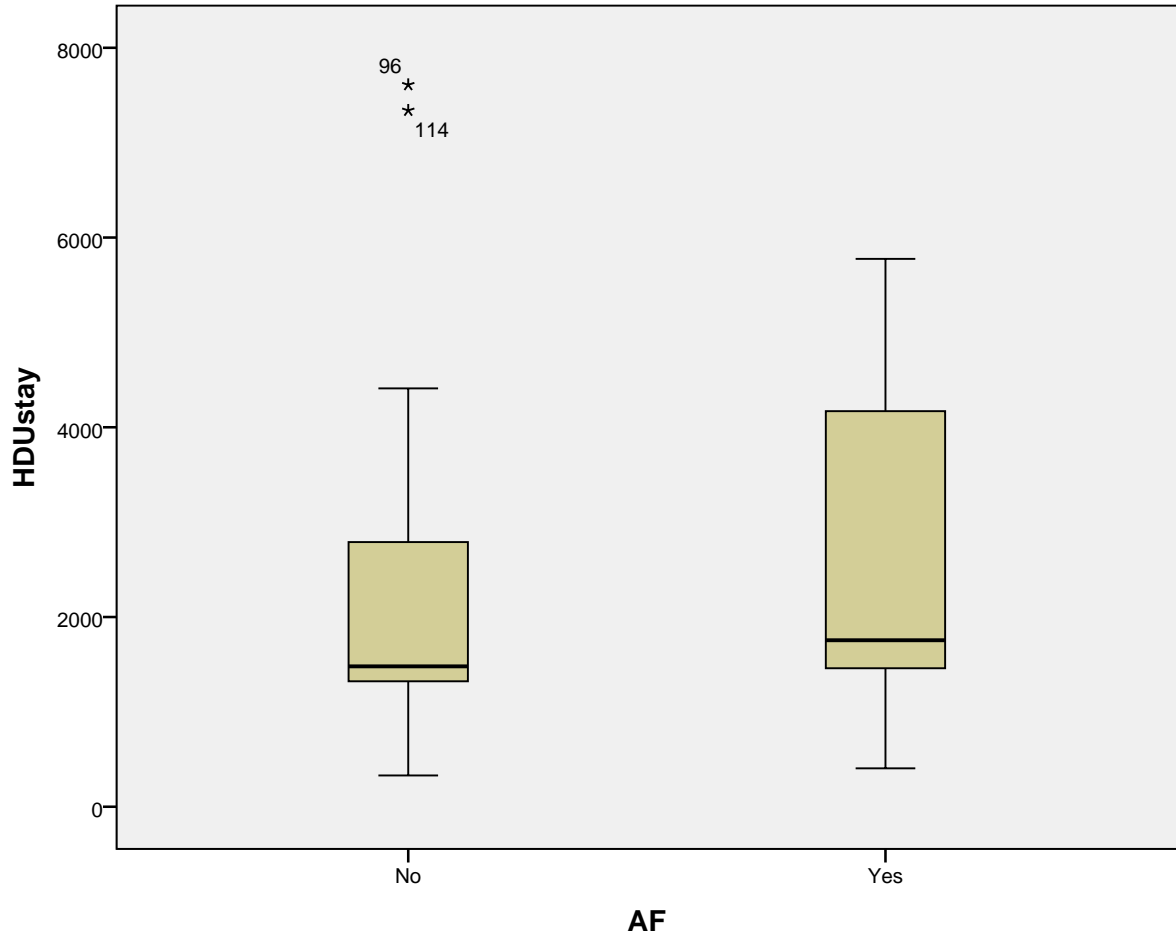

## HospStay

### Stem-and-Leaf Plots

HospStay Stem-and-Leaf Plot for  
AF= No

| Frequency | Stem & | Leaf        |
|-----------|--------|-------------|
| 8.00      | 6 .    | 00000000    |
| .00       | 6 .    |             |
| 11.00     | 7 .    | 00000000000 |
| .00       | 7 .    |             |
| 4.00      | 8 .    | 0000        |
| .00       | 8 .    |             |
| 5.00      | 9 .    | 00000       |
| .00       | 9 .    |             |
| 2.00      | 10 .   | 00          |
| .00       | 10 .   |             |
| .00       | 11 .   |             |
| .00       | 11 .   |             |

```
1.00      12 . 0
1.00 Extremes    (>=19.0)
```

```
Stem width:      1
Each leaf:       1 case(s)
```

HospStay Stem-and-Leaf Plot for  
AF= Yes

```
Frequency      Stem & Leaf

 2.00         6 . 00
 1.00         7 . 0
 6.00         8 . 000000
 .00          9 .
 5.00        10 . 00000
 .00        11 .
 1.00        12 . 0
 2.00        13 . 00
 1.00 Extremes    (>=21.0)
```

```
Stem width:      1
Each leaf:       1 case(s)
```

## Normal Q-Q Plots

Normal Q-Q Plot of HospStay  
for AF= No

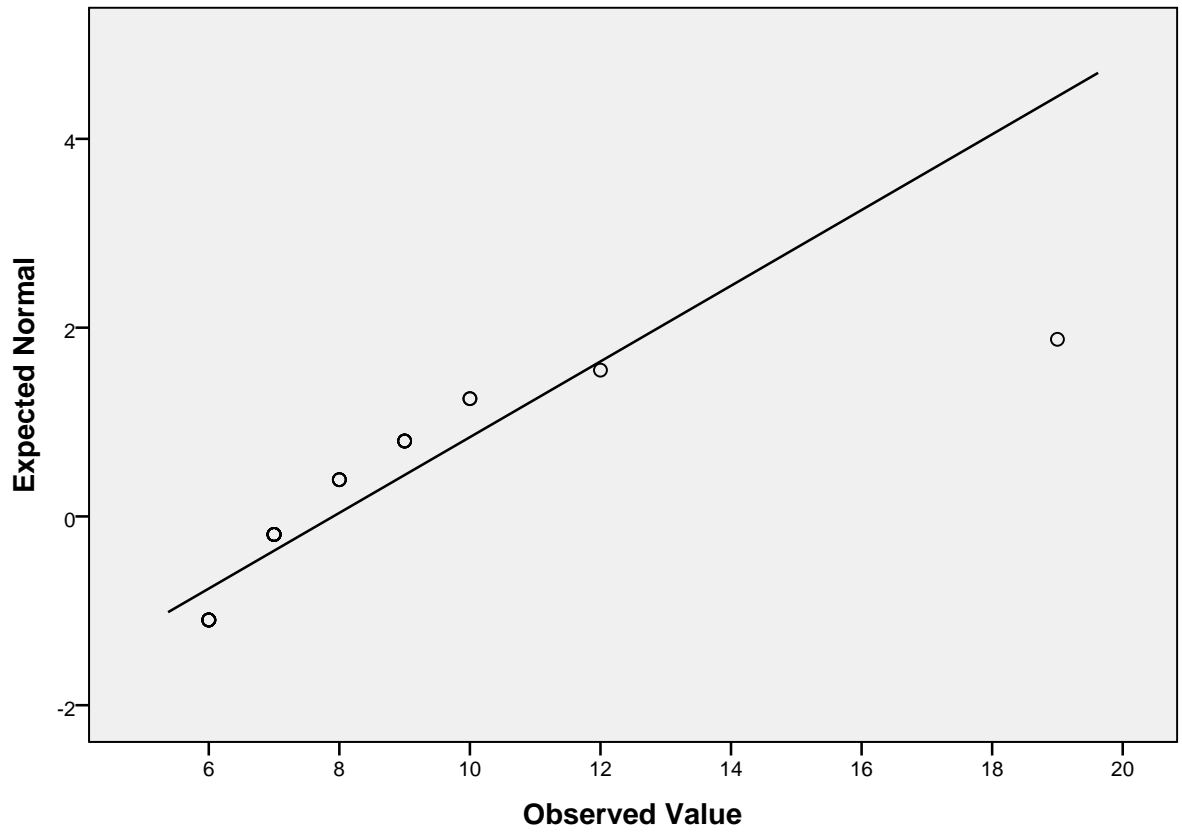

**Normal Q-Q Plot of HospStay**

for AF= Yes

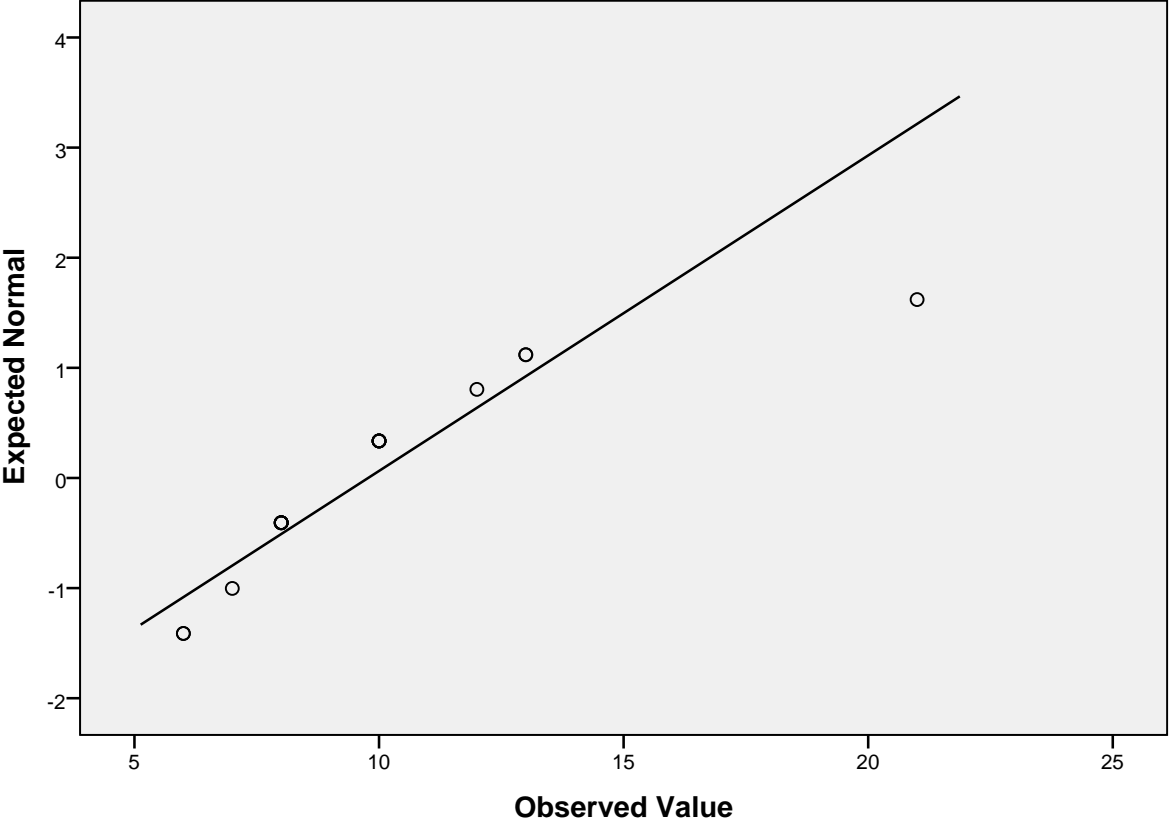

**Detrended Normal Q-Q Plots**

### Detrended Normal Q-Q Plot of HospStay

for AF= No

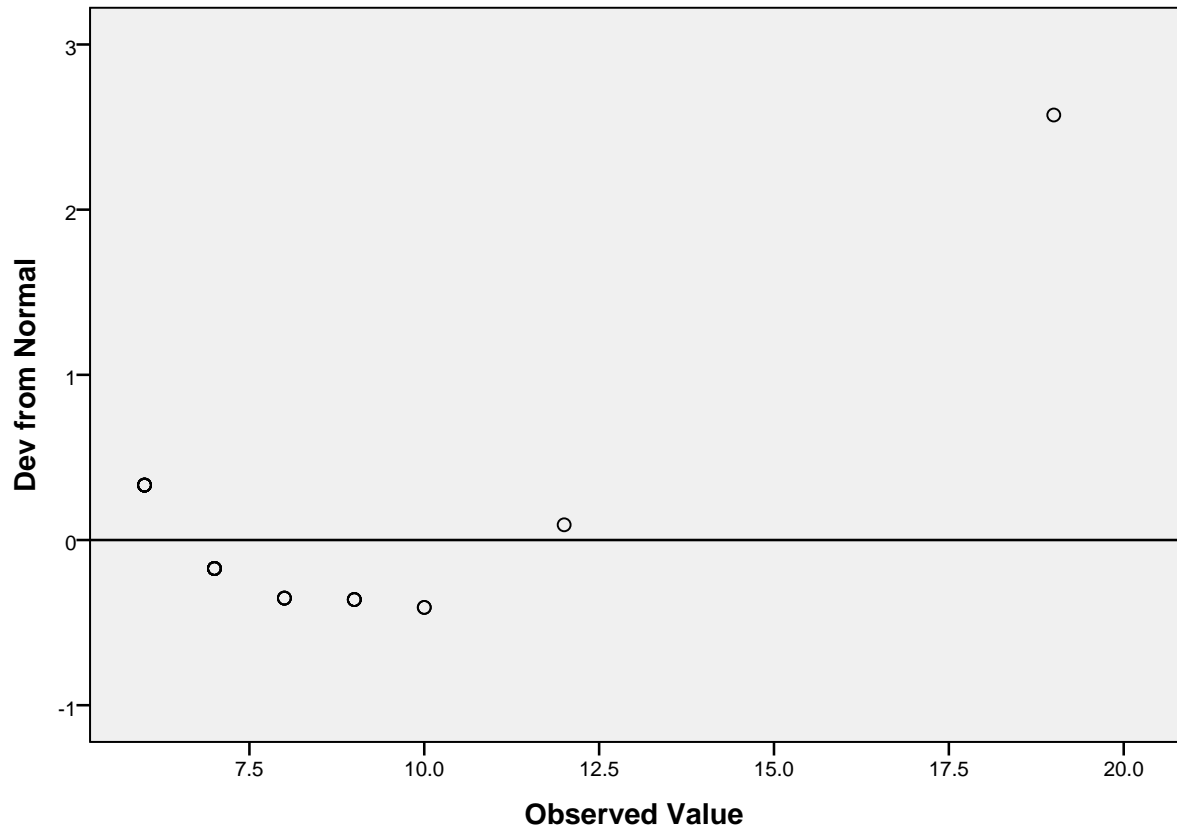

### Detrended Normal Q-Q Plot of HospStay

for AF= Yes

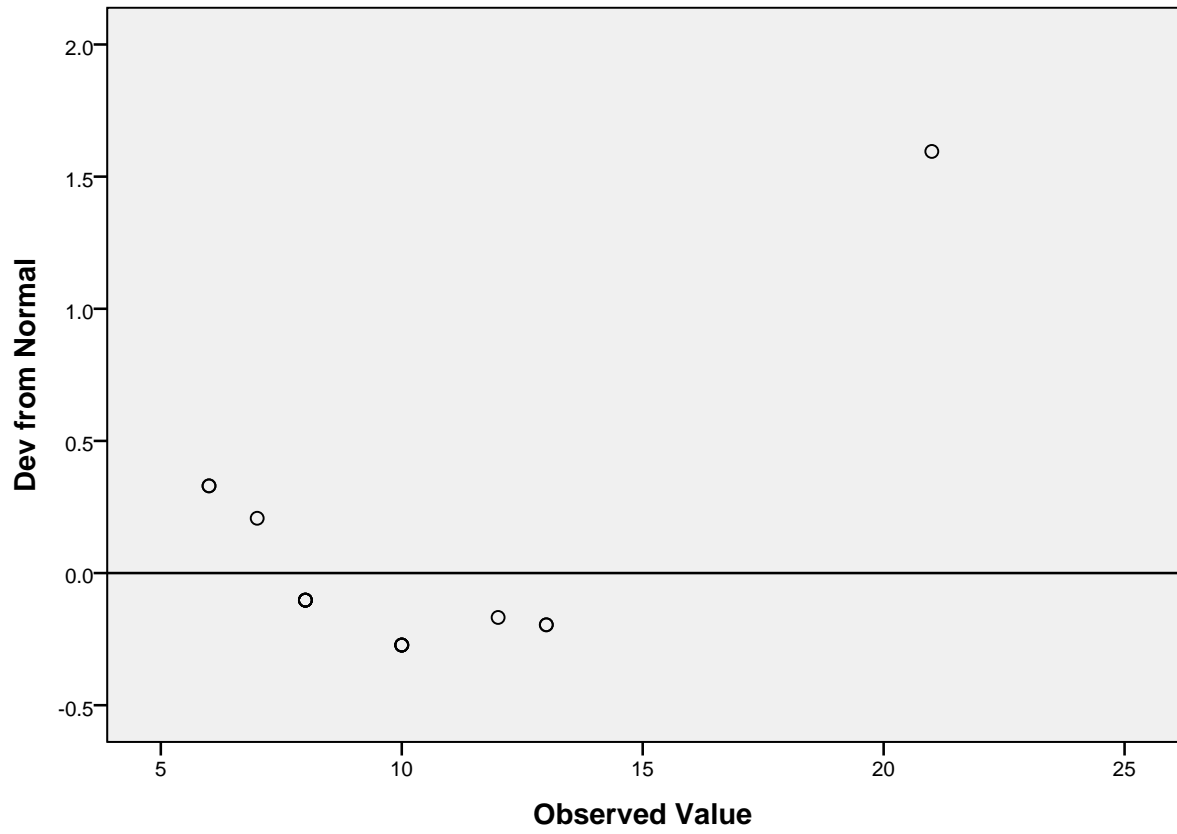



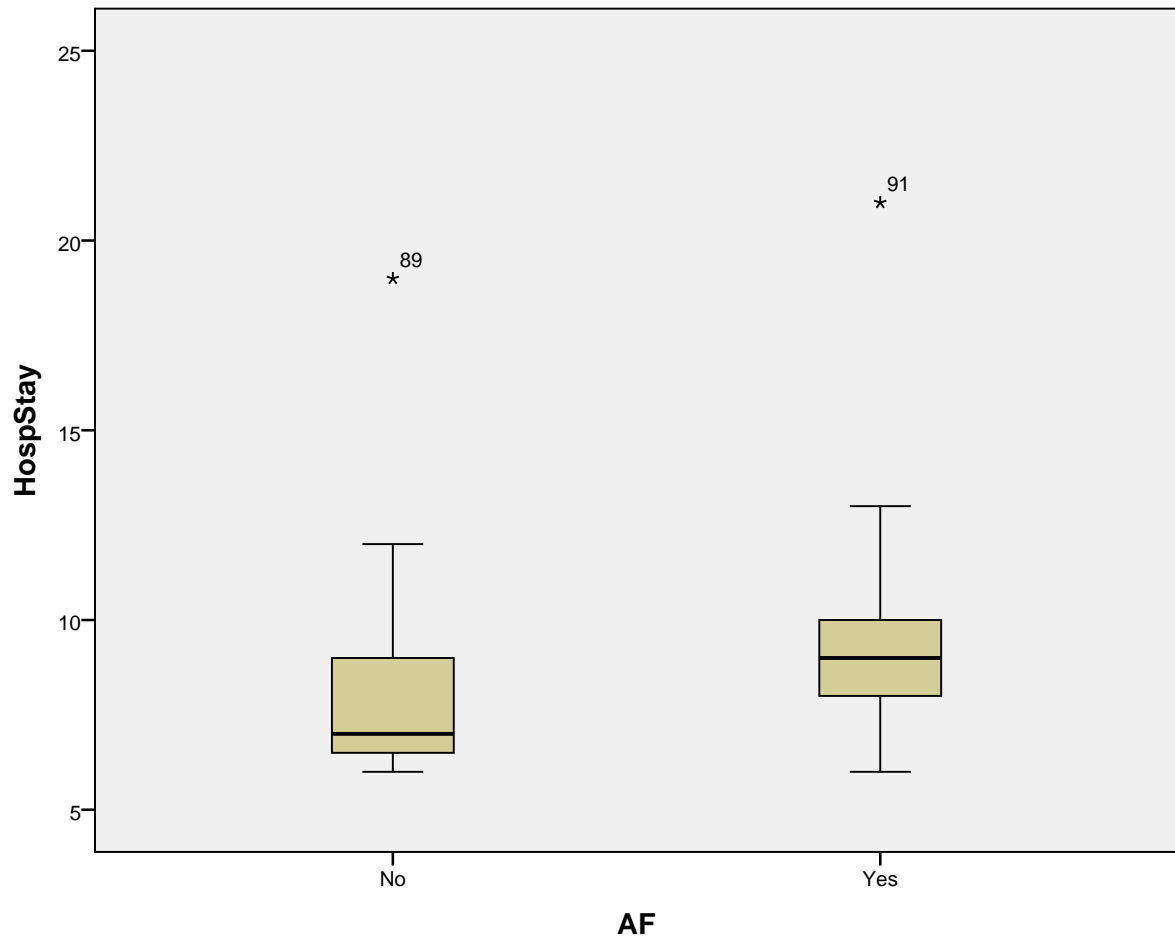

**NPAR TESTS**

```

/M-W= VENT CICUstay HDUstay HospStay BY AF(0 1)
/STATISTICS=DESCRIPTIVES
/MISSING ANALYSIS.

```

**NPar Tests**

**Notes**

|                        |                                      |                                                                                                                                       |
|------------------------|--------------------------------------|---------------------------------------------------------------------------------------------------------------------------------------|
| Output Created         |                                      | 01-MAR-2021 14:56:23                                                                                                                  |
| Comments               |                                      |                                                                                                                                       |
| Input                  | Data                                 | C:\Users\user\Downloads\ImAnisah Statistic & SPSS\TOCO T3\Data toco.sav                                                               |
|                        | Active Dataset                       | DataSet1                                                                                                                              |
|                        | Filter                               | <none>                                                                                                                                |
|                        | Weight                               | <none>                                                                                                                                |
|                        | Split File                           | <none>                                                                                                                                |
|                        | N of Rows in Working Data File       | 156                                                                                                                                   |
| Missing Value Handling | Definition of Missing                | User-defined missing values are treated as missing.                                                                                   |
|                        | Cases Used                           | Statistics for each test are based on all cases with valid data for the variable(s) used in that test.                                |
| Syntax                 |                                      | <pre> NPAR TESTS   /M-W= VENT CICUstay HDUstay   HospStay BY AF(0 1)   /STATISTICS=DESCRIPTIVES   /MISSING ANALYSIS.           </pre> |
| Resources              | Processor Time                       | 00:00:00.00                                                                                                                           |
|                        | Elapsed Time                         | 00:00:00.02                                                                                                                           |
|                        | Number of Cases Allowed <sup>a</sup> | 314572                                                                                                                                |

a. Based on availability of workspace memory.

**Descriptive Statistics**

|                       | N   | Mean    | Std. Deviation | Minimum | Maximum |
|-----------------------|-----|---------|----------------|---------|---------|
| Total hours intubated | 101 | 1421.36 | 1053.102       | 619     | 7380    |
| CICUstay              | 99  | 3505.67 | 3777.435       | 640     | 30405   |
| HDUstay               | 54  | 2274.44 | 1574.645       | 330     | 7610    |
| HospStay              | 135 | 10.81   | 11.597         | 5       | 86      |
| AF                    | 156 | .24     | .431           | 0       | 1       |

**Mann-Whitney Test**

**Ranks**

|                       | AF    | N   | Mean Rank | Sum of Ranks |
|-----------------------|-------|-----|-----------|--------------|
| Total hours intubated | No    | 72  | 48.74     | 3509.00      |
|                       | Yes   | 29  | 56.62     | 1642.00      |
|                       | Total | 101 |           |              |
| CICUstay              | No    | 72  | 45.42     | 3270.00      |
|                       | Yes   | 27  | 62.22     | 1680.00      |
|                       | Total | 99  |           |              |
| HDUstay               | No    | 33  | 25.83     | 852.50       |
|                       | Yes   | 21  | 30.12     | 632.50       |
|                       | Total | 54  |           |              |
| HospStay              | No    | 101 | 64.03     | 6467.50      |
|                       | Yes   | 34  | 79.78     | 2712.50      |
|                       | Total | 135 |           |              |

**Test Statistics<sup>a</sup>**

|                        | Total hours intubated | CICUstay | HDUstay | HospStay |
|------------------------|-----------------------|----------|---------|----------|
| Mann-Whitney U         | 881.000               | 642.000  | 291.500 | 1316.500 |
| Wilcoxon W             | 3509.000              | 3270.000 | 852.500 | 6467.500 |
| Z                      | -1.224                | -2.593   | -.976   | -2.060   |
| Asymp. Sig. (2-tailed) | .221                  | .010     | .329    | .039     |

a. Grouping Variable: AF

CROSSTABS

/TABLES=Reintubation BY AF

/FORMAT=AVALUE TABLES

/STATISTICS=CHISQ

/CELLS=COUNT ROW COLUMN

/COUNT ROUND CELL.

**Crosstabs**

**Notes**

|                        |                                   |                                                                                                                                          |
|------------------------|-----------------------------------|------------------------------------------------------------------------------------------------------------------------------------------|
| Output Created         | 01-MAR-2021 14:57:09              |                                                                                                                                          |
| Comments               |                                   |                                                                                                                                          |
| Input                  | Data                              | C:\Users\user\Downloads\ImAnisah<br>Statistic & SPSS\TOCO T3\Data<br>toco.sav                                                            |
|                        | Active Dataset                    | DataSet1                                                                                                                                 |
|                        | Filter                            | <none>                                                                                                                                   |
|                        | Weight                            | <none>                                                                                                                                   |
|                        | Split File                        | <none>                                                                                                                                   |
|                        | N of Rows in Working Data<br>File | 156                                                                                                                                      |
| Missing Value Handling | Definition of Missing             | User-defined missing values are<br>treated as missing.                                                                                   |
|                        | Cases Used                        | Statistics for each table are based<br>on all the cases with valid data in the<br>specified range(s) for all variables in<br>each table. |
| Syntax                 |                                   | CROSSTABS<br>/TABLES=Reintubation BY AF<br>/FORMAT=AVALUE TABLES<br>/STATISTICS=CHISQ<br>/CELLS=COUNT ROW COLUMN<br>/COUNT ROUND CELL.   |
| Resources              | Processor Time                    | 00:00:00.03                                                                                                                              |
|                        | Elapsed Time                      | 00:00:00.05                                                                                                                              |
|                        | Dimensions Requested              | 2                                                                                                                                        |
|                        | Cells Available                   | 524245                                                                                                                                   |

**Case Processing Summary**

|                   | Cases |         |         |         |       |         |
|-------------------|-------|---------|---------|---------|-------|---------|
|                   | Valid |         | Missing |         | Total |         |
|                   | N     | Percent | N       | Percent | N     | Percent |
| Reintubation * AF | 156   | 100.0%  | 0       | 0.0%    | 156   | 100.0%  |

**Reintubation \* AF Crosstabulation**

|              |                       |                       | AF     |        | Total  |
|--------------|-----------------------|-----------------------|--------|--------|--------|
|              |                       |                       | No     | Yes    |        |
| Reintubation | No                    | Count                 | 117    | 35     | 152    |
|              |                       | % within Reintubation | 77.0%  | 23.0%  | 100.0% |
|              |                       | % within AF           | 99.2%  | 92.1%  | 97.4%  |
|              | Yes                   | Count                 | 1      | 3      | 4      |
|              |                       | % within Reintubation | 25.0%  | 75.0%  | 100.0% |
|              |                       | % within AF           | 0.8%   | 7.9%   | 2.6%   |
| Total        | Count                 | 118                   | 38     | 156    |        |
|              | % within Reintubation | 75.6%                 | 24.4%  | 100.0% |        |
|              | % within AF           | 100.0%                | 100.0% | 100.0% |        |

**Chi-Square Tests**

|                                    | Value              | df | Asymptotic<br>Significance (2-<br>sided) | Exact Sig. (2-<br>sided) | Exact Sig. (1-<br>sided) |
|------------------------------------|--------------------|----|------------------------------------------|--------------------------|--------------------------|
| Pearson Chi-Square                 | 5.714 <sup>a</sup> | 1  | .017                                     | .045                     | .045                     |
| Continuity Correction <sup>b</sup> | 3.241              | 1  | .072                                     |                          |                          |
| Likelihood Ratio                   | 4.682              | 1  | .030                                     |                          |                          |
| Fisher's Exact Test                |                    |    |                                          |                          |                          |
| Linear-by-Linear<br>Association    | 5.677              | 1  | .017                                     |                          |                          |
| N of Valid Cases                   | 156                |    |                                          |                          |                          |

a. 2 cells (50.0%) have expected count less than 5. The minimum expected count is .97.

b. Computed only for a 2x2 table
